# Supplementary material for: PUMILIO hyperactivity drives premature aging of Norad-deficient mice
Source: eLife. 2019 Feb 8;8:e42650. doi: 10.7554/eLife.42650 (PMC6407921; doi:10.7554/eLife.42650)
Supplement: Supplementary file 1. — Genomic coordinates refer to mm10. [file elife-42650-supp1.xlsx]

## Sheet: PUM2 CLIP clusters in WT brain
Supplementary Table 1: PUM2 CLIP clusters in Norad+/+ brain
Merged clusters from both replicates shown, genomic coordinates for mm10
chr	start	stop	id	strand	gene_id	annotation_type
chr1	3200007	3200045	BRN_WT_1	-	Intergenic	Intergenic
chr1	3200049	3200143	BRN_WT_2	-	Intergenic	Intergenic
chr1	3200156	3200199	BRN_WT_3	-	Intergenic	Intergenic
chr1	3200413	3200453	BRN_WT_4	-	Intergenic	Intergenic
chr1	3200455	3200560	BRN_WT_5	-	Intergenic	Intergenic
chr1	3214370	3214412	BRN_WT_6	-	Xkr4	Noncoding_exon
chr1	3567143	3567285	BRN_WT_7	-	Xkr4	Coding_intron
chr1	3574494	3574645	BRN_WT_8	-	Xkr4	Coding_intron
chr1	3574740	3574840	BRN_WT_9	-	Xkr4	Coding_intron
chr1	4405453	4405473	BRN_WT_10	-	Rp1	Coding_intron
chr1	4493609	4493620	BRN_WT_11	+	Intergenic	Intergenic
chr1	4525813	4525825	BRN_WT_12	-	Intergenic	Intergenic
chr1	4529016	4529123	BRN_WT_13	+	Gm22307	Noncoding_exon
chr1	4807971	4807984	BRN_WT_14	-	Intergenic	Intergenic
chr1	4879565	4879579	BRN_WT_15	-	Intergenic	Intergenic
chr1	4896496	4896541	BRN_WT_16	+	Tcea1	UTR3
chr1	4896682	4896721	BRN_WT_17	+	Tcea1	UTR3
chr1	4897009	4897045	BRN_WT_18	+	Tcea1	UTR3
chr1	4946134	4946172	BRN_WT_19	-	Rgs20	Coding_intron
chr1	5109891	5109928	BRN_WT_20	+	Atp6v1h	Coding_intron
chr1	5110344	5110384	BRN_WT_21	+	Atp6v1h	Coding_intron
chr1	5111246	5111285	BRN_WT_22	+	Atp6v1h	Coding_intron
chr1	5111358	5111400	BRN_WT_23	+	Atp6v1h	Coding_intron
chr1	5111707	5111733	BRN_WT_24	+	Atp6v1h	Coding_intron
chr1	5112048	5112082	BRN_WT_25	+	Atp6v1h	Coding_intron
chr1	5112386	5112422	BRN_WT_26	+	Atp6v1h	Coding_intron
chr1	5112557	5112591	BRN_WT_27	+	Atp6v1h	Coding_intron
chr1	5112731	5112760	BRN_WT_28	+	Atp6v1h	Coding_intron
chr1	5113015	5113045	BRN_WT_29	+	Atp6v1h	Coding_intron
chr1	5113238	5113275	BRN_WT_30	+	Atp6v1h	Coding_intron
chr1	5113298	5113333	BRN_WT_31	+	Atp6v1h	Coding_intron
chr1	5113925	5113959	BRN_WT_32	+	Atp6v1h	Coding_intron
chr1	5114375	5114414	BRN_WT_33	+	Atp6v1h	Coding_intron
chr1	5114495	5114528	BRN_WT_34	+	Atp6v1h	Coding_intron
chr1	5114913	5114974	BRN_WT_35	+	Atp6v1h	Coding_intron
chr1	5170739	5170756	BRN_WT_36	-	Intergenic	Intergenic
chr1	6214720	6214733	BRN_WT_37	+	Rb1cc1	UTR5
chr1	6248800	6248962	BRN_WT_38	+	Rb1cc1	Coding_cdsexon
chr1	6274565	6274689	BRN_WT_39	+	Rb1cc1	UTR3
chr1	6274711	6274842	BRN_WT_40	+	Rb1cc1	UTR3
chr1	6275050	6275129	BRN_WT_41	+	Rb1cc1	UTR3
chr1	6620670	6620692	BRN_WT_42	+	St18	Coding_intron
chr1	7169937	7170073	BRN_WT_43	+	Pcmtd1	UTR3
chr1	7170576	7170681	BRN_WT_44	+	Pcmtd1	UTR3
chr1	7170776	7170818	BRN_WT_45	+	Pcmtd1	UTR3
chr1	7171722	7172001	BRN_WT_46	+	Pcmtd1	UTR3
chr1	7298757	7298774	BRN_WT_47	+	Intergenic	Intergenic
chr1	8359800	8359884	BRN_WT_48	-	Intergenic	Intergenic
chr1	8363163	8363221	BRN_WT_49	-	Sntg1	UTR3
chr1	9363448	9363464	BRN_WT_50	+	Intergenic	Intergenic
chr1	9575901	9576007	BRN_WT_51	+	Adhfe1	Coding_intron
chr1	9634053	9634083	BRN_WT_52	+	Intergenic	Intergenic
chr1	9644007	9644026	BRN_WT_53	-	Intergenic	Intergenic
chr1	9722045	9722153	BRN_WT_54	-	Vcpip1	UTR3
chr1	9723078	9723147	BRN_WT_55	-	Vcpip1	UTR3
chr1	9723219	9723440	BRN_WT_56	-	Vcpip1	UTR3
chr1	9723443	9723568	BRN_WT_57	-	Vcpip1	UTR3
chr1	9723587	9723728	BRN_WT_58	-	Vcpip1	UTR3
chr1	9724048	9724098	BRN_WT_59	-	Vcpip1	UTR3
chr1	9724189	9724464	BRN_WT_60	-	Vcpip1	UTR3
chr1	10100599	10100640	BRN_WT_61	+	Cspp1	Coding_intron
chr1	10101146	10101193	BRN_WT_62	+	Cspp1	Coding_intron
chr1	10137596	10137743	BRN_WT_63	-	Arfgef1	UTR3
chr1	10137788	10137923	BRN_WT_64	-	Arfgef1	UTR3
chr1	10138206	10138307	BRN_WT_65	-	Arfgef1	UTR3
chr1	10138329	10138446	BRN_WT_66	-	Arfgef1	UTR3
chr1	10232491	10232547	BRN_WT_67	-	Arfgef1	UTR5
chr1	10233064	10233084	BRN_WT_68	-	Intergenic	Intergenic
chr1	11297847	11297926	BRN_WT_69	+	Prex2	UTR3
chr1	11297938	11298118	BRN_WT_70	+	Prex2	UTR3
chr1	11298597	11298903	BRN_WT_71	+	Prex2	UTR3
chr1	11299165	11299285	BRN_WT_72	+	Prex2	UTR3
chr1	11299292	11299392	BRN_WT_73	+	Prex2	UTR3
chr1	11299773	11300128	BRN_WT_74	+	Prex2	UTR3
chr1	11300387	11300472	BRN_WT_75	+	Prex2	UTR3
chr1	11301734	11301780	BRN_WT_76	+	Prex2	UTR3
chr1	11301782	11301879	BRN_WT_77	+	Prex2	UTR3
chr1	11302058	11302145	BRN_WT_78	+	Prex2	UTR3
chr1	11302222	11302404	BRN_WT_79	+	Prex2	UTR3
chr1	11302949	11303430	BRN_WT_80	+	Prex2	UTR3
chr1	11303468	11303670	BRN_WT_81	+	Prex2	UTR3
chr1	11596399	11596546	BRN_WT_82	+	A830018L16Rik	UTR3
chr1	11596877	11596933	BRN_WT_83	+	A830018L16Rik	UTR3
chr1	11598439	11598827	BRN_WT_84	+	A830018L16Rik	UTR3
chr1	11601270	11601337	BRN_WT_85	+	A830018L16Rik	UTR3
chr1	11736006	11736021	BRN_WT_86	+	A830018L16Rik	Coding_intron
chr1	12374945	12375042	BRN_WT_87	+	Gm22633	Noncoding_exon
chr1	13139127	13139315	BRN_WT_88	-	Ncoa2	UTR3
chr1	13139338	13139532	BRN_WT_89	-	Ncoa2	UTR3
chr1	13139565	13139696	BRN_WT_90	-	Ncoa2	UTR3
chr1	13139757	13139784	BRN_WT_91	-	Ncoa2	UTR3
chr1	13139847	13139874	BRN_WT_92	-	Ncoa2	UTR3
chr1	13141452	13141591	BRN_WT_93	-	Ncoa2	UTR3
chr1	13142377	13142411	BRN_WT_94	-	Ncoa2	UTR3
chr1	13330410	13330424	BRN_WT_95	+	Intergenic	Intergenic
chr1	13541867	13541902	BRN_WT_96	+	Intergenic	Intergenic
chr1	14169873	14169932	BRN_WT_97	-	Eya1	UTR3
chr1	14170149	14170224	BRN_WT_98	-	Eya1	UTR3
chr1	15326781	15326844	BRN_WT_99	+	Kcnb2	Coding_intron
chr1	15344636	15344920	BRN_WT_100	+	Kcnb2	Coding_intron
chr1	15421626	15421922	BRN_WT_101	+	Kcnb2	Coding_intron
chr1	15421968	15422233	BRN_WT_102	+	Kcnb2	Coding_intron
chr1	15422244	15422409	BRN_WT_103	+	Kcnb2	Coding_intron
chr1	15422431	15422489	BRN_WT_104	+	Kcnb2	Coding_intron
chr1	15422579	15422613	BRN_WT_105	+	Kcnb2	Coding_intron
chr1	15422616	15422719	BRN_WT_106	+	Kcnb2	Coding_intron
chr1	15422737	15422853	BRN_WT_107	+	Kcnb2	Coding_intron
chr1	15712268	15712337	BRN_WT_108	+	Kcnb2	UTR3
chr1	16263525	16263561	BRN_WT_109	-	Stau2	Coding_intron
chr1	16328208	16328227	BRN_WT_110	+	Intergenic	Intergenic
chr1	16501954	16502017	BRN_WT_111	-	Stau2	Coding_intron
chr1	16519511	16519544	BRN_WT_112	-	Stau2	Coding_intron
chr1	16570368	16570413	BRN_WT_113	-	Ube2w	UTR3
chr1	16570508	16570566	BRN_WT_114	-	Ube2w	UTR3
chr1	16641974	16642065	BRN_WT_115	-	Tceb1	UTR3
chr1	16642727	16642790	BRN_WT_116	-	Tceb1	UTR3
chr1	16996466	16996508	BRN_WT_117	-	Jph1	UTR3
chr1	17232460	17232487	BRN_WT_118	-	Intergenic	Intergenic
chr1	17308368	17308385	BRN_WT_119	-	Intergenic	Intergenic
chr1	17327867	17327880	BRN_WT_120	+	Intergenic	Intergenic
chr1	18597391	18597450	BRN_WT_121	+	Intergenic	Intergenic
chr1	19152928	19152977	BRN_WT_122	-	Intergenic	Intergenic
chr1	19176275	19176339	BRN_WT_123	-	Intergenic	Intergenic
chr1	19986351	19986379	BRN_WT_124	-	Intergenic	Intergenic
chr1	19986409	19986436	BRN_WT_125	-	Intergenic	Intergenic
chr1	19986449	19986469	BRN_WT_126	-	Intergenic	Intergenic
chr1	20444842	20444869	BRN_WT_127	-	Pkhd1	Coding_intron
chr1	20936495	20936568	BRN_WT_128	+	Paqr8	UTR3
chr1	20936998	20937026	BRN_WT_129	+	Paqr8	UTR3
chr1	20937284	20937477	BRN_WT_130	+	Paqr8	UTR3
chr1	20938319	20938414	BRN_WT_131	+	Paqr8	UTR3
chr1	20938500	20938582	BRN_WT_132	+	Paqr8	UTR3
chr1	20938904	20938959	BRN_WT_133	+	Paqr8	UTR3
chr1	21079134	21079148	BRN_WT_134	+	Intergenic	Intergenic
chr1	21938760	21938808	BRN_WT_135	-	Kcnq5	Coding_intron
chr1	22286774	22286828	BRN_WT_136	-	Rims1	UTR3
chr1	22323822	22323840	BRN_WT_137	+	Intergenic	Intergenic
chr1	22327516	22327974	BRN_WT_138	-	Rims1	Coding_intron
chr1	22364183	22364351	BRN_WT_139	-	Rims1	Coding_intron
chr1	22364457	22364619	BRN_WT_140	-	Rims1	Coding_intron
chr1	22389611	22389715	BRN_WT_141	-	Rims1	Coding_intron
chr1	22584556	22584678	BRN_WT_142	-	Rims1	Coding_intron
chr1	22584713	22584877	BRN_WT_143	-	Rims1	Coding_intron
chr1	22721857	22721975	BRN_WT_144	-	Rims1	Coding_intron
chr1	22788104	22788188	BRN_WT_145	-	Rims1	Coding_intron
chr1	22805991	22806004	BRN_WT_146	+	Intergenic	Intergenic
chr1	22952393	22952450	BRN_WT_147	-	Intergenic	Intergenic
chr1	23117185	23117216	BRN_WT_148	-	Gm29506	Noncoding_intron
chr1	23291713	23291737	BRN_WT_149	+	Gm27028	Noncoding_exon
chr1	23366461	23366879	BRN_WT_150	-	Ogfrl1	UTR3
chr1	23366917	23367166	BRN_WT_151	-	Ogfrl1	UTR3
chr1	23367190	23367298	BRN_WT_152	-	Ogfrl1	UTR3
chr1	23367302	23367530	BRN_WT_153	-	Ogfrl1	UTR3
chr1	23367543	23367618	BRN_WT_154	-	Ogfrl1	UTR3
chr1	23368291	23368374	BRN_WT_155	-	Ogfrl1	UTR3
chr1	23368468	23368586	BRN_WT_156	-	Ogfrl1	UTR3
chr1	23368605	23368851	BRN_WT_157	-	Ogfrl1	UTR3
chr1	23368861	23368889	BRN_WT_158	-	Ogfrl1	UTR3
chr1	23369215	23369284	BRN_WT_159	-	Ogfrl1	UTR3
chr1	23369420	23369578	BRN_WT_160	-	Ogfrl1	UTR3
chr1	23628076	23628090	BRN_WT_161	+	Intergenic	Intergenic
chr1	23846306	23846369	BRN_WT_162	-	Smap1	UTR3
chr1	23873033	23873075	BRN_WT_163	+	Intergenic	Intergenic
chr1	24612440	24612683	BRN_WT_164	-	Gm10222	Noncoding_exon
chr1	24614811	24614869	BRN_WT_165	-	Intergenic	Intergenic
chr1	24626613	24626638	BRN_WT_166	-	Intergenic	Intergenic
chr1	24762876	24763168	BRN_WT_167	+	Lmbrd1	UTR3
chr1	24763843	24763918	BRN_WT_168	+	Lmbrd1	UTR3
chr1	24765236	24765406	BRN_WT_169	+	Lmbrd1	UTR3
chr1	24980385	24980397	BRN_WT_170	+	Intergenic	Intergenic
chr1	25067711	25067849	BRN_WT_171	-	Adgrb3	UTR3
chr1	25136361	25136430	BRN_WT_172	-	Adgrb3	Coding_intron
chr1	25183049	25183156	BRN_WT_173	-	Adgrb3	Coding_intron
chr1	25205736	25205822	BRN_WT_174	-	Adgrb3	Coding_intron
chr1	25458894	25458912	BRN_WT_175	-	Adgrb3	Coding_intron
chr1	25653447	25653522	BRN_WT_176	-	Adgrb3	Coding_intron
chr1	25706190	25706402	BRN_WT_177	-	Adgrb3	Coding_intron
chr1	25780040	25780053	BRN_WT_178	-	Adgrb3	Coding_intron
chr1	27260951	27260982	BRN_WT_179	+	Intergenic	Intergenic
chr1	27263905	27263923	BRN_WT_180	+	Intergenic	Intergenic
chr1	27847104	27847141	BRN_WT_181	+	Intergenic	Intergenic
chr1	27994489	27994533	BRN_WT_182	+	Intergenic	Intergenic
chr1	29544424	29544440	BRN_WT_183	-	Intergenic	Intergenic
chr1	29666100	29666112	BRN_WT_184	-	Intergenic	Intergenic
chr1	30803107	30803205	BRN_WT_185	-	Phf3	UTR3
chr1	30803393	30803454	BRN_WT_186	-	Phf3	UTR3
chr1	30803533	30803603	BRN_WT_187	-	Phf3	UTR3
chr1	30805851	30805867	BRN_WT_188	+	Intergenic	Intergenic
chr1	30940336	30940411	BRN_WT_189	-	Ptp4a1	UTR3
chr1	30941026	30941142	BRN_WT_190	-	Ptp4a1	UTR3
chr1	30941217	30941343	BRN_WT_191	-	Ptp4a1	UTR3
chr1	30941596	30941783	BRN_WT_192	-	Ptp4a1	UTR3
chr1	30941971	30942058	BRN_WT_193	-	Ptp4a1	UTR3
chr1	30942561	30942631	BRN_WT_194	-	Ptp4a1	UTR3
chr1	30942735	30942905	BRN_WT_195	-	Ptp4a1	UTR3
chr1	32359019	32359047	BRN_WT_196	+	Khdrbs2	Coding_intron
chr1	32584946	32584974	BRN_WT_197	+	Khdrbs2	Coding_intron
chr1	33038115	33038144	BRN_WT_198	-	Intergenic	Intergenic
chr1	33567154	33568893	BRN_WT_199	-	Prim2	Coding_intron
chr1	33568897	33570556	BRN_WT_200	-	Prim2	Coding_intron
chr1	33570563	33571098	BRN_WT_201	-	Prim2	Coding_intron
chr1	33795978	33796042	BRN_WT_202	-	Zfp451	UTR3
chr1	33797778	33797806	BRN_WT_203	-	Zfp451	UTR3
chr1	33797859	33797981	BRN_WT_204	-	Zfp451	UTR3
chr1	33798365	33798419	BRN_WT_205	-	Zfp451	UTR3
chr1	33798564	33798634	BRN_WT_206	-	Zfp451	UTR3
chr1	33798750	33798861	BRN_WT_207	-	Zfp451	UTR3
chr1	33800408	33800458	BRN_WT_208	-	Zfp451	UTR3
chr1	33921103	33921219	BRN_WT_209	+	Dst	Coding_intron
chr1	34201009	34201056	BRN_WT_210	+	Dst	Coding_cdsexon
chr1	34228656	34228754	BRN_WT_211	+	Dst	Coding_cdsexon
chr1	34228924	34229033	BRN_WT_212	+	Dst	Coding_cdsexon
chr1	34270944	34271015	BRN_WT_213	+	Dst	Coding_cdsexon
chr1	34275286	34275338	BRN_WT_214	+	Dst	Coding_cdsexon
chr1	34308020	34308131	BRN_WT_215	+	Dst	UTR3
chr1	34351853	34351867	BRN_WT_216	-	Intergenic	Intergenic
chr1	34580553	34580568	BRN_WT_217	-	Intergenic	Intergenic
chr1	34816224	34816370	BRN_WT_218	-	Fam168b	UTR3
chr1	35140805	35140823	BRN_WT_219	-	Intergenic	Intergenic
chr1	36472052	36472069	BRN_WT_220	-	Intergenic	Intergenic
chr1	36556115	36556130	BRN_WT_221	+	Intergenic	Intergenic
chr1	36807057	36807073	BRN_WT_222	-	Tmem131	Coding_intron
chr1	37303731	37303748	BRN_WT_223	-	Intergenic	Intergenic
chr1	37403845	37403916	BRN_WT_224	+	Inpp4a	UTR3
chr1	37408949	37408989	BRN_WT_225	+	Inpp4a	UTR3
chr1	37409157	37409192	BRN_WT_226	+	Inpp4a	UTR3
chr1	37410599	37410722	BRN_WT_227	+	Inpp4a	UTR3
chr1	37417649	37417711	BRN_WT_228	-	Coa5	UTR3
chr1	37434460	37434910	BRN_WT_229	+	Unc50	Coding_intron
chr1	37434983	37435101	BRN_WT_230	+	Unc50	Coding_intron
chr1	37435120	37435163	BRN_WT_231	+	Unc50	Coding_intron
chr1	37435164	37435330	BRN_WT_232	+	Unc50	Coding_intron
chr1	37438837	37438973	BRN_WT_233	+	Unc50	UTR3
chr1	37439405	37439461	BRN_WT_234	-	Mgat4a	UTR3
chr1	37443104	37443201	BRN_WT_235	-	Mgat4a	UTR3
chr1	37444036	37444075	BRN_WT_236	-	Mgat4a	UTR3
chr1	37444118	37444212	BRN_WT_237	-	Mgat4a	UTR3
chr1	37444358	37444396	BRN_WT_238	-	Mgat4a	UTR3
chr1	37578341	37578358	BRN_WT_239	+	Intergenic	Intergenic
chr1	37695421	37695434	BRN_WT_240	+	Intergenic	Intergenic
chr1	38052862	38052932	BRN_WT_241	+	Eif5b	UTR3
chr1	38397913	38397935	BRN_WT_242	+	Intergenic	Intergenic
chr1	38627230	38627246	BRN_WT_243	+	Intergenic	Intergenic
chr1	38730842	38730859	BRN_WT_244	+	Intergenic	Intergenic
chr1	38732764	38732781	BRN_WT_245	-	Intergenic	Intergenic
chr1	38793685	38793738	BRN_WT_246	-	Lonrf2	UTR3
chr1	38793947	38794014	BRN_WT_247	-	Lonrf2	UTR3
chr1	38797339	38797499	BRN_WT_248	-	Lonrf2	UTR3
chr1	38808966	38809207	BRN_WT_249	-	Lonrf2	Coding_intron
chr1	38809590	38809832	BRN_WT_250	-	Lonrf2	Coding_intron
chr1	38809953	38810231	BRN_WT_251	-	Lonrf2	Coding_intron
chr1	38810260	38810353	BRN_WT_252	-	Lonrf2	Coding_intron
chr1	38916532	38916600	BRN_WT_253	+	Intergenic	Intergenic
chr1	38916623	38916650	BRN_WT_254	+	Intergenic	Intergenic
chr1	39363024	39363081	BRN_WT_255	+	Npas2	UTR3
chr1	39684561	39684574	BRN_WT_256	-	Rfx8	Coding_intron
chr1	39779622	39779634	BRN_WT_257	-	Intergenic	Intergenic
chr1	39803430	39803473	BRN_WT_258	-	Intergenic	Intergenic
chr1	39901389	39901408	BRN_WT_259	-	Intergenic	Intergenic
chr1	40141880	40141900	BRN_WT_260	-	Intergenic	Intergenic
chr1	40215717	40215744	BRN_WT_261	-	Intergenic	Intergenic
chr1	40440647	40440661	BRN_WT_262	-	Intergenic	Intergenic
chr1	40590704	40590720	BRN_WT_263	-	Intergenic	Intergenic
chr1	41127686	41127699	BRN_WT_264	+	Intergenic	Intergenic
chr1	41381118	41381158	BRN_WT_265	+	Intergenic	Intergenic
chr1	42696931	42696959	BRN_WT_266	+	Pou3f3	UTR5
chr1	42697215	42697303	BRN_WT_267	+	Pou3f3	Coding_cdsexon
chr1	42697438	42697490	BRN_WT_268	+	Pou3f3	Coding_cdsexon
chr1	42697841	42697873	BRN_WT_269	+	Pou3f3	Coding_cdsexon
chr1	42702547	42702624	BRN_WT_270	+	Pou3f3	UTR3
chr1	42741006	42741024	BRN_WT_271	+	Gm20646	Noncoding_intron
chr1	42782775	42782794	BRN_WT_272	-	Intergenic	Intergenic
chr1	42944675	42944688	BRN_WT_273	+	Intergenic	Intergenic
chr1	43084413	43084430	BRN_WT_274	+	Intergenic	Intergenic
chr1	43114351	43114404	BRN_WT_275	+	AI597479	UTR3
chr1	43114416	43114487	BRN_WT_276	+	AI597479	UTR3
chr1	43115827	43115943	BRN_WT_277	+	AI597479	UTR3
chr1	43140719	43140749	BRN_WT_278	+	Intergenic	Intergenic
chr1	43701024	43701047	BRN_WT_279	+	Intergenic	Intergenic
chr1	43888717	43888853	BRN_WT_280	+	Intergenic	Intergenic
chr1	43888881	43888912	BRN_WT_281	+	Intergenic	Intergenic
chr1	43889312	43889362	BRN_WT_282	+	Intergenic	Intergenic
chr1	43889438	43889488	BRN_WT_283	+	Intergenic	Intergenic
chr1	43889670	43889727	BRN_WT_284	+	Intergenic	Intergenic
chr1	44165766	44165778	BRN_WT_285	+	Ercc5	Coding_intron
chr1	44461005	44461093	BRN_WT_286	-	Intergenic	Intergenic
chr1	44461266	44461402	BRN_WT_287	-	Intergenic	Intergenic
chr1	45452048	45452061	BRN_WT_288	+	Intergenic	Intergenic
chr1	45603682	45603700	BRN_WT_289	-	Intergenic	Intergenic
chr1	45925580	45925593	BRN_WT_290	-	Slc40a1	Coding_intron
chr1	46075936	46075985	BRN_WT_291	-	Intergenic	Intergenic
chr1	46076015	46076046	BRN_WT_292	-	Intergenic	Intergenic
chr1	46236711	46236726	BRN_WT_293	-	Intergenic	Intergenic
chr1	46732582	46732623	BRN_WT_294	+	Dnah7c	Coding_intron
chr1	46807564	46807658	BRN_WT_295	-	Slc39a10	UTR3
chr1	46807696	46807826	BRN_WT_296	-	Slc39a10	UTR3
chr1	46807899	46808091	BRN_WT_297	-	Slc39a10	UTR3
chr1	46808435	46808486	BRN_WT_298	-	Slc39a10	UTR3
chr1	46808742	46808817	BRN_WT_299	-	Slc39a10	UTR3
chr1	46809177	46809334	BRN_WT_300	-	Slc39a10	UTR3
chr1	46809352	46809410	BRN_WT_301	-	Slc39a10	UTR3
chr1	46809839	46809935	BRN_WT_302	-	Slc39a10	UTR3
chr1	48190575	48190593	BRN_WT_303	-	Intergenic	Intergenic
chr1	48256927	48256943	BRN_WT_304	-	Intergenic	Intergenic
chr1	48389909	48389925	BRN_WT_305	-	Intergenic	Intergenic
chr1	48596961	48596988	BRN_WT_306	-	Intergenic	Intergenic
chr1	49830620	49830696	BRN_WT_307	-	Intergenic	Intergenic
chr1	50076287	50076312	BRN_WT_308	+	Intergenic	Intergenic
chr1	50512680	50512694	BRN_WT_309	-	Intergenic	Intergenic
chr1	51783095	51783173	BRN_WT_310	-	Myo1b	Coding_intron
chr1	52110602	52110624	BRN_WT_311	+	Gm28177	Noncoding_intron
chr1	52113965	52113977	BRN_WT_312	+	Gm28177	Noncoding_exon
chr1	52163647	52163800	BRN_WT_313	-	Gls	UTR3
chr1	52163828	52163989	BRN_WT_314	-	Gls	UTR3
chr1	52164412	52164495	BRN_WT_315	-	Gls	UTR3
chr1	52165478	52165514	BRN_WT_316	-	Gls	UTR3
chr1	52165727	52165947	BRN_WT_317	-	Gls	UTR3
chr1	52165996	52166102	BRN_WT_318	-	Gls	UTR3
chr1	52178713	52178833	BRN_WT_319	-	Gls	Coding_intron
chr1	52225780	52225816	BRN_WT_320	-	Gls	Coding_intron
chr1	52585488	52585554	BRN_WT_321	+	Intergenic	Intergenic
chr1	52598740	52598757	BRN_WT_322	+	Intergenic	Intergenic
chr1	52727417	52727434	BRN_WT_323	-	Mfsd6	UTR5
chr1	52750055	52750070	BRN_WT_324	+	Intergenic	Intergenic
chr1	52788870	52788965	BRN_WT_325	-	Inpp1	UTR3
chr1	53234466	53234481	BRN_WT_326	-	Pms1	Coding_intron
chr1	53396821	53396911	BRN_WT_327	+	Intergenic	Intergenic
chr1	53807121	53807146	BRN_WT_328	-	Hecw2	UTR3
chr1	53812353	53812409	BRN_WT_329	-	Hecw2	UTR3
chr1	53812592	53812616	BRN_WT_330	-	Hecw2	UTR3
chr1	54098883	54099045	BRN_WT_331	-	Hecw2	Coding_intron
chr1	54099054	54099235	BRN_WT_332	-	Hecw2	Coding_intron
chr1	54249101	54249208	BRN_WT_333	-	Gm25829	Noncoding_exon
chr1	54250781	54250801	BRN_WT_334	+	Ccdc150	UTR5
chr1	54259061	54259075	BRN_WT_335	-	Intergenic	Intergenic
chr1	54986776	54986845	BRN_WT_336	-	Sf3b1	UTR3
chr1	55050328	55050346	BRN_WT_337	+	Intergenic	Intergenic
chr1	55072170	55072240	BRN_WT_338	+	Coq10b	UTR3
chr1	55077879	55077923	BRN_WT_339	-	Hspd1	UTR3
chr1	55152862	55152953	BRN_WT_340	+	Mob4	UTR3
chr1	55153296	55153329	BRN_WT_341	+	Mob4	UTR3
chr1	55153934	55153999	BRN_WT_342	+	Mob4	UTR3
chr1	55244374	55244446	BRN_WT_343	+	Mars2	UTR3
chr1	55245443	55245475	BRN_WT_344	+	Mars2	UTR3
chr1	55245739	55245804	BRN_WT_345	+	Mars2	UTR3
chr1	55446738	55446786	BRN_WT_346	+	Plcl1	Coding_intron
chr1	55458136	55458153	BRN_WT_347	-	Intergenic	Intergenic
chr1	55497797	55497813	BRN_WT_348	+	Plcl1	Coding_intron
chr1	55502654	55502667	BRN_WT_349	-	Intergenic	Intergenic
chr1	55550111	55550127	BRN_WT_350	+	Plcl1	Coding_intron
chr1	55574079	55574161	BRN_WT_351	+	Plcl1	Coding_intron
chr1	56131681	56131745	BRN_WT_352	-	Intergenic	Intergenic
chr1	56407511	56407525	BRN_WT_353	+	Intergenic	Intergenic
chr1	57091601	57091633	BRN_WT_354	+	Intergenic	Intergenic
chr1	57534804	57534816	BRN_WT_355	-	Intergenic	Intergenic
chr1	58113463	58113480	BRN_WT_356	-	Intergenic	Intergenic
chr1	58393489	58393501	BRN_WT_357	-	Intergenic	Intergenic
chr1	58406610	58406700	BRN_WT_358	+	Bzw1	UTR3
chr1	58522862	58523170	BRN_WT_359	-	Fam126b	UTR3
chr1	58523392	58523422	BRN_WT_360	-	Fam126b	UTR3
chr1	58523979	58524028	BRN_WT_361	-	Fam126b	UTR3
chr1	58524059	58524221	BRN_WT_362	-	Fam126b	UTR3
chr1	58525561	58525598	BRN_WT_363	-	Fam126b	UTR3
chr1	58525613	58525807	BRN_WT_364	-	Fam126b	UTR3
chr1	58526742	58526804	BRN_WT_365	-	Fam126b	UTR3
chr1	58526866	58526951	BRN_WT_366	-	Fam126b	UTR3
chr1	58527034	58527096	BRN_WT_367	-	Fam126b	UTR3
chr1	58527134	58527213	BRN_WT_368	-	Fam126b	UTR3
chr1	58527385	58527500	BRN_WT_369	-	Fam126b	UTR3
chr1	58527573	58527692	BRN_WT_370	-	Fam126b	UTR3
chr1	58527810	58528020	BRN_WT_371	-	Fam126b	UTR3
chr1	58528030	58528086	BRN_WT_372	-	Fam126b	UTR3
chr1	58528725	58528750	BRN_WT_373	-	Fam126b	UTR3
chr1	58529376	58529492	BRN_WT_374	-	Fam126b	UTR3
chr1	58533115	58533181	BRN_WT_375	-	Fam126b	Coding_intron
chr1	58647703	58647742	BRN_WT_376	+	Intergenic	Intergenic
chr1	58647848	58647955	BRN_WT_377	+	Intergenic	Intergenic
chr1	58648222	58648310	BRN_WT_378	+	Intergenic	Intergenic
chr1	58754205	58754298	BRN_WT_379	+	Cflar	UTR3
chr1	58755224	58755331	BRN_WT_380	+	Cflar	UTR3
chr1	58755546	58755597	BRN_WT_381	+	Cflar	UTR3
chr1	58757893	58757921	BRN_WT_382	+	Cflar	UTR3
chr1	58758038	58758075	BRN_WT_383	+	Cflar	UTR3
chr1	58900850	58900937	BRN_WT_384	-	Trak2	UTR3
chr1	58902354	58902437	BRN_WT_385	-	Trak2	UTR3
chr1	58902581	58902663	BRN_WT_386	-	Trak2	UTR3
chr1	58902744	58902841	BRN_WT_387	-	Trak2	UTR3
chr1	59486762	59486875	BRN_WT_388	+	Fzd7	UTR3
chr1	59506610	59506627	BRN_WT_389	+	Intergenic	Intergenic
chr1	59704807	59704826	BRN_WT_390	+	Nop58	Coding_intron
chr1	59804215	59804230	BRN_WT_391	+	Bmpr2	Coding_intron
chr1	59870565	59870620	BRN_WT_392	+	Bmpr2	UTR3
chr1	59871364	59871448	BRN_WT_393	+	Bmpr2	UTR3
chr1	59875499	59875566	BRN_WT_394	+	Bmpr2	UTR3
chr1	59876563	59876595	BRN_WT_395	+	Bmpr2	UTR3
chr1	59876694	59876835	BRN_WT_396	+	Bmpr2	UTR3
chr1	59876924	59877070	BRN_WT_397	+	Bmpr2	UTR3
chr1	59877343	59877399	BRN_WT_398	+	Bmpr2	UTR3
chr1	59877459	59877599	BRN_WT_399	+	Bmpr2	UTR3
chr1	59947851	59947869	BRN_WT_400	-	Intergenic	Intergenic
chr1	59982390	59982453	BRN_WT_401	+	Fam117b	UTR3
chr1	59982601	59982624	BRN_WT_402	+	Fam117b	UTR3
chr1	59984264	59984323	BRN_WT_403	+	Fam117b	UTR3
chr1	60151845	60151878	BRN_WT_404	+	Carf	UTR3
chr1	60153518	60153560	BRN_WT_405	+	Carf	UTR3
chr1	60153867	60153947	BRN_WT_406	+	Carf	UTR3
chr1	60332215	60332368	BRN_WT_407	+	Nbeal1	UTR3
chr1	60338097	60338308	BRN_WT_408	+	Nbeal1	UTR3
chr1	60477397	60477482	BRN_WT_409	+	Abi2	UTR3
chr1	60479242	60479411	BRN_WT_410	+	Abi2	UTR3
chr1	60479670	60479748	BRN_WT_411	+	Abi2	UTR3
chr1	60479822	60479944	BRN_WT_412	+	Abi2	UTR3
chr1	60480296	60480333	BRN_WT_413	+	Abi2	UTR3
chr1	60483633	60483739	BRN_WT_414	-	Raph1	UTR3
chr1	60484112	60484155	BRN_WT_415	-	Raph1	UTR3
chr1	60487966	60488044	BRN_WT_416	-	Raph1	UTR3
chr1	60488068	60488108	BRN_WT_417	-	Raph1	UTR3
chr1	60488147	60488187	BRN_WT_418	-	Raph1	UTR3
chr1	61915902	61915915	BRN_WT_419	+	Pard3b	Coding_intron
chr1	62530783	62530800	BRN_WT_420	-	Intergenic	Intergenic
chr1	62571438	62571475	BRN_WT_421	+	Pard3b	Coding_intron
chr1	63047815	63048007	BRN_WT_422	-	Ino80d	UTR3
chr1	63049394	63049512	BRN_WT_423	-	Ino80d	UTR3
chr1	63049594	63049652	BRN_WT_424	-	Ino80d	UTR3
chr1	63050522	63050694	BRN_WT_425	-	Ino80d	UTR3
chr1	63051463	63051539	BRN_WT_426	-	Ino80d	UTR3
chr1	63051707	63051758	BRN_WT_427	-	Ino80d	UTR3
chr1	63057620	63057682	BRN_WT_428	-	Ino80d	UTR3
chr1	63312250	63312299	BRN_WT_429	+	Zdbf2	UTR3
chr1	63323581	63323612	BRN_WT_430	-	Intergenic	Intergenic
chr1	63323657	63323683	BRN_WT_431	-	Intergenic	Intergenic
chr1	63326009	63326029	BRN_WT_432	-	Intergenic	Intergenic
chr1	63592858	63592907	BRN_WT_433	+	Adam23	UTR3
chr1	63593566	63593673	BRN_WT_434	+	Adam23	UTR3
chr1	63593709	63593867	BRN_WT_435	+	Adam23	UTR3
chr1	63993145	63993158	BRN_WT_436	-	Intergenic	Intergenic
chr1	64021271	64021294	BRN_WT_437	+	Intergenic	Intergenic
chr1	64029508	64029682	BRN_WT_438	-	Klf7	UTR3
chr1	64035434	64035502	BRN_WT_439	-	Klf7	UTR3
chr1	64121976	64121990	BRN_WT_440	-	Klf7	Coding_intron
chr1	64134032	64134076	BRN_WT_441	-	Intergenic	Intergenic
chr1	64599726	64599861	BRN_WT_442	+	Creb1	UTR3
chr1	64599908	64599990	BRN_WT_443	+	Creb1	UTR3
chr1	64600044	64600209	BRN_WT_444	+	Creb1	UTR3
chr1	64600319	64600398	BRN_WT_445	+	Creb1	UTR3
chr1	64601228	64601294	BRN_WT_446	+	Creb1	UTR3
chr1	64601443	64601510	BRN_WT_447	+	Creb1	UTR3
chr1	64601825	64601887	BRN_WT_448	+	Creb1	UTR3
chr1	64602248	64602341	BRN_WT_449	+	Creb1	UTR3
chr1	64602342	64602438	BRN_WT_450	+	Creb1	UTR3
chr1	64602711	64602950	BRN_WT_451	+	Creb1	UTR3
chr1	64639172	64639199	BRN_WT_452	-	Intergenic	Intergenic
chr1	65186892	65186910	BRN_WT_453	-	Intergenic	Intergenic
chr1	65275802	65275905	BRN_WT_454	+	Pikfyve	UTR3
chr1	65276464	65276527	BRN_WT_455	+	Pikfyve	UTR3
chr1	65276548	65276790	BRN_WT_456	+	Pikfyve	UTR3
chr1	65438114	65438133	BRN_WT_457	-	Intergenic	Intergenic
chr1	65523685	65523702	BRN_WT_458	+	Intergenic	Intergenic
chr1	66326522	66326599	BRN_WT_459	+	Map2	Coding_intron
chr1	66358296	66358462	BRN_WT_460	+	Map2	Coding_intron
chr1	66414988	66415068	BRN_WT_461	+	Map2	Coding_cdsexon
chr1	66439036	66439087	BRN_WT_462	+	Map2	Coding_cdsexon
chr1	66439092	66439211	BRN_WT_463	+	Map2	UTR3
chr1	66439219	66439475	BRN_WT_464	+	Map2	UTR3
chr1	66439528	66439573	BRN_WT_465	+	Map2	UTR3
chr1	66439588	66439786	BRN_WT_466	+	Map2	UTR3
chr1	66439790	66440132	BRN_WT_467	+	Map2	UTR3
chr1	66440241	66440367	BRN_WT_468	+	Map2	UTR3
chr1	66440740	66440846	BRN_WT_469	+	Map2	UTR3
chr1	66441057	66441092	BRN_WT_470	+	Map2	UTR3
chr1	66442228	66442369	BRN_WT_471	+	Map2	UTR3
chr1	66442375	66442459	BRN_WT_472	+	Map2	UTR3
chr1	66442478	66442584	BRN_WT_473	+	Map2	UTR3
chr1	66676867	66676942	BRN_WT_474	+	Unc80	Coding_intron
chr1	66695812	66695916	BRN_WT_475	+	Unc80	UTR3
chr1	66695964	66696071	BRN_WT_476	+	Unc80	UTR3
chr1	66696294	66696366	BRN_WT_477	+	Unc80	UTR3
chr1	66696443	66696741	BRN_WT_478	+	Unc80	UTR3
chr1	66696802	66696984	BRN_WT_479	+	Unc80	UTR3
chr1	66697257	66697478	BRN_WT_480	+	Unc80	UTR3
chr1	66699056	66699126	BRN_WT_481	+	Unc80	UTR3
chr1	66719122	66719221	BRN_WT_482	+	Rpe	UTR3
chr1	66830863	66830952	BRN_WT_483	-	Acadl	UTR3
chr1	67262734	67262753	BRN_WT_484	+	Gm15668	Noncoding_intron
chr1	67345103	67345120	BRN_WT_485	-	Intergenic	Intergenic
chr1	67956750	67956767	BRN_WT_486	-	Intergenic	Intergenic
chr1	68032377	68032409	BRN_WT_487	-	Erbb4	UTR3
chr1	68032426	68032562	BRN_WT_488	-	Erbb4	UTR3
chr1	68032632	68032863	BRN_WT_489	-	Erbb4	UTR3
chr1	68033358	68033513	BRN_WT_490	-	Erbb4	UTR3
chr1	68033717	68033787	BRN_WT_491	-	Erbb4	UTR3
chr1	68033799	68033928	BRN_WT_492	-	Erbb4	UTR3
chr1	68034109	68034360	BRN_WT_493	-	Erbb4	UTR3
chr1	68035798	68035870	BRN_WT_494	-	Erbb4	UTR3
chr1	68036954	68037053	BRN_WT_495	-	Erbb4	UTR3
chr1	68037210	68037240	BRN_WT_496	-	Erbb4	UTR3
chr1	68917245	68917301	BRN_WT_497	-	Erbb4	Coding_intron
chr1	68926679	68926748	BRN_WT_498	-	Erbb4	Coding_intron
chr1	68947706	68947808	BRN_WT_499	-	Erbb4	Coding_intron
chr1	69031961	69031998	BRN_WT_500	-	Erbb4	Coding_intron
chr1	69456740	69456785	BRN_WT_501	+	Intergenic	Intergenic
chr1	69456799	69456843	BRN_WT_502	+	Intergenic	Intergenic
chr1	71602933	71602947	BRN_WT_503	-	Fn1	Coding_intron
chr1	71870100	71870131	BRN_WT_504	-	Intergenic	Intergenic
chr1	72226239	72226359	BRN_WT_505	+	Gm25360	Noncoding_exon
chr1	72284609	72284622	BRN_WT_506	+	Tmem169	Coding_intron
chr1	73177694	73177709	BRN_WT_507	+	Intergenic	Intergenic
chr1	73459816	73459829	BRN_WT_508	-	Intergenic	Intergenic
chr1	73580612	73580625	BRN_WT_509	-	Intergenic	Intergenic
chr1	73804356	73804372	BRN_WT_510	+	Intergenic	Intergenic
chr1	73863422	73863438	BRN_WT_511	-	6030407O03Rik	Noncoding_intron
chr1	73910349	73910437	BRN_WT_512	-	Tns1	UTR3
chr1	73914338	73914404	BRN_WT_513	-	Tns1	UTR3
chr1	74204061	74204079	BRN_WT_514	-	Intergenic	Intergenic
chr1	74294405	74294423	BRN_WT_515	-	Tmbim1	Coding_intron
chr1	74353475	74353528	BRN_WT_516	+	Pnkd	UTR3
chr1	74353550	74353661	BRN_WT_517	+	Pnkd	UTR3
chr1	74396240	74396333	BRN_WT_518	+	Ctdsp1	UTR3
chr1	74396339	74396411	BRN_WT_519	+	Ctdsp1	UTR3
chr1	74396429	74396479	BRN_WT_520	+	Ctdsp1	UTR3
chr1	74788834	74788852	BRN_WT_521	+	Intergenic	Intergenic
chr1	74816782	74816817	BRN_WT_522	-	Intergenic	Intergenic
chr1	74855010	74855033	BRN_WT_523	+	Cdk5r2	UTR5
chr1	74857290	74857353	BRN_WT_524	+	Cdk5r2	UTR3
chr1	75214978	75215064	BRN_WT_525	-	Tuba4a	UTR3
chr1	75215446	75215547	BRN_WT_526	-	Tuba4a	UTR3
chr1	75309341	75309354	BRN_WT_527	-	Dnpep	Coding_cdsexon
chr1	75367753	75367771	BRN_WT_528	-	Intergenic	Intergenic
chr1	75450671	75450687	BRN_WT_529	-	Intergenic	Intergenic
chr1	75473882	75474060	BRN_WT_530	+	Asic4	UTR3
chr1	75507161	75507215	BRN_WT_531	+	Inha	UTR5
chr1	77368971	77369128	BRN_WT_532	-	Epha4	UTR3
chr1	77440303	77440319	BRN_WT_533	+	Intergenic	Intergenic
chr1	77603485	77603566	BRN_WT_534	-	Intergenic	Intergenic
chr1	77725348	77725363	BRN_WT_535	+	Intergenic	Intergenic
chr1	78664885	78664900	BRN_WT_536	+	Utp14b	Coding_cdsexon
chr1	78679280	78679345	BRN_WT_537	+	Acsl3	Coding_intron
chr1	78706386	78706508	BRN_WT_538	+	Acsl3	UTR3
chr1	78706526	78706618	BRN_WT_539	+	Acsl3	UTR3
chr1	78706716	78706980	BRN_WT_540	+	Acsl3	UTR3
chr1	78782699	78782807	BRN_WT_541	-	Intergenic	Intergenic
chr1	79288229	79288244	BRN_WT_542	+	Intergenic	Intergenic
chr1	79361978	79361993	BRN_WT_543	+	Intergenic	Intergenic
chr1	79434761	79434797	BRN_WT_544	-	Scg2	UTR3
chr1	79435048	79435077	BRN_WT_545	-	Scg2	UTR3
chr1	79589654	79589669	BRN_WT_546	-	Intergenic	Intergenic
chr1	79749570	79749587	BRN_WT_547	+	Intergenic	Intergenic
chr1	79794653	79794668	BRN_WT_548	-	Serpine2	UTR3
chr1	80135465	80135573	BRN_WT_549	+	Gm23934	Noncoding_exon
chr1	80142474	80142528	BRN_WT_550	-	Intergenic	Intergenic
chr1	80265192	80265258	BRN_WT_551	-	Cul3	UTR3
chr1	80265746	80265828	BRN_WT_552	-	Cul3	UTR3
chr1	80266137	80266260	BRN_WT_553	-	Cul3	UTR3
chr1	80266262	80266415	BRN_WT_554	-	Cul3	UTR3
chr1	80266419	80266521	BRN_WT_555	-	Cul3	UTR3
chr1	80266584	80266654	BRN_WT_556	-	Cul3	UTR3
chr1	80266687	80266824	BRN_WT_557	-	Cul3	UTR3
chr1	80267085	80267127	BRN_WT_558	-	Cul3	UTR3
chr1	80287028	80287112	BRN_WT_559	-	Cul3	Coding_cdsexon
chr1	80501301	80501394	BRN_WT_560	-	Dock10	UTR3
chr1	80649286	80649312	BRN_WT_561	+	Intergenic	Intergenic
chr1	80705431	80705479	BRN_WT_562	+	Intergenic	Intergenic
chr1	81336967	81337194	BRN_WT_563	+	Nyap2	UTR3
chr1	81338439	81338480	BRN_WT_564	+	Nyap2	UTR3
chr1	81340609	81340657	BRN_WT_565	+	Nyap2	UTR3
chr1	81340699	81340770	BRN_WT_566	+	Nyap2	UTR3
chr1	81341006	81341032	BRN_WT_567	+	Nyap2	UTR3
chr1	81341043	81341179	BRN_WT_568	+	Nyap2	UTR3
chr1	81341210	81341270	BRN_WT_569	+	Nyap2	UTR3
chr1	81341451	81341559	BRN_WT_570	+	Nyap2	UTR3
chr1	81341597	81341686	BRN_WT_571	+	Nyap2	UTR3
chr1	81341706	81341759	BRN_WT_572	+	Nyap2	UTR3
chr1	81611480	81611505	BRN_WT_573	+	Intergenic	Intergenic
chr1	81894401	81894414	BRN_WT_574	-	Intergenic	Intergenic
chr1	81987762	81987775	BRN_WT_575	-	Intergenic	Intergenic
chr1	82233120	82233163	BRN_WT_576	-	Irs1	UTR3
chr1	82233229	82233307	BRN_WT_577	-	Irs1	UTR3
chr1	82233352	82233387	BRN_WT_578	-	Irs1	UTR3
chr1	82648504	82648519	BRN_WT_579	-	Intergenic	Intergenic
chr1	82751908	82752010	BRN_WT_580	+	Mff	UTR3
chr1	82752306	82752387	BRN_WT_581	+	Mff	UTR3
chr1	82786625	82786689	BRN_WT_582	+	Intergenic	Intergenic
chr1	82857376	82857656	BRN_WT_583	+	Agfg1	Coding_intron
chr1	82895128	82895186	BRN_WT_584	+	Agfg1	UTR3
chr1	82895329	82895403	BRN_WT_585	+	Agfg1	UTR3
chr1	82895683	82895764	BRN_WT_586	+	Agfg1	UTR3
chr1	82895862	82895997	BRN_WT_587	+	Agfg1	UTR3
chr1	82897791	82897866	BRN_WT_588	+	Agfg1	UTR3
chr1	82899898	82899942	BRN_WT_589	+	Agfg1	UTR3
chr1	83103674	83103736	BRN_WT_590	-	Intergenic	Intergenic
chr1	83170961	83171019	BRN_WT_591	-	Intergenic	Intergenic
chr1	83225188	83225243	BRN_WT_592	-	Intergenic	Intergenic
chr1	84277606	84277877	BRN_WT_593	-	Pid1	Coding_intron
chr1	84277944	84278262	BRN_WT_594	-	Pid1	Coding_intron
chr1	84370137	84370182	BRN_WT_595	-	Dner	UTR3
chr1	84370218	84370251	BRN_WT_596	-	Dner	UTR3
chr1	84370342	84370446	BRN_WT_597	-	Dner	UTR3
chr1	84385732	84385747	BRN_WT_598	-	Dner	Coding_intron
chr1	84724134	84724242	BRN_WT_599	-	Trip12	UTR3
chr1	84897567	84897580	BRN_WT_600	+	Fbxo36	Coding_intron
chr1	85161383	85161422	BRN_WT_601	-	C130026I21Rik	Coding_intron
chr1	85691467	85691571	BRN_WT_602	+	Sp100	Coding_intron
chr1	85849358	85849422	BRN_WT_603	+	Cab39	UTR3
chr1	85849764	85850079	BRN_WT_604	+	Cab39	UTR3
chr1	85850338	85850413	BRN_WT_605	+	Cab39	UTR3
chr1	85851458	85851515	BRN_WT_606	+	Cab39	UTR3
chr1	85907682	85907798	BRN_WT_607	+	Itm2c	UTR3
chr1	85907799	85907855	BRN_WT_608	+	Itm2c	UTR3
chr1	85908498	85908553	BRN_WT_609	+	Itm2c	UTR3
chr1	85908563	85908613	BRN_WT_610	+	Itm2c	UTR3
chr1	85908624	85908674	BRN_WT_611	+	Itm2c	UTR3
chr1	86269985	86270000	BRN_WT_612	+	Armc9	Coding_intron
chr1	86527746	86527762	BRN_WT_613	-	Intergenic	Intergenic
chr1	86529488	86529534	BRN_WT_614	+	Ptma	Coding_cdsexon
chr1	86530067	86530137	BRN_WT_615	+	Ptma	UTR3
chr1	86530299	86530409	BRN_WT_616	+	Ptma	UTR3
chr1	86530478	86530659	BRN_WT_617	+	Ptma	UTR3
chr1	87312357	87312369	BRN_WT_618	-	Intergenic	Intergenic
chr1	87543162	87543285	BRN_WT_619	-	Ngef	Coding_intron
chr1	87543324	87543381	BRN_WT_620	-	Ngef	Coding_intron
chr1	87549479	87549492	BRN_WT_621	-	Ngef	Coding_intron
chr1	87736189	87736206	BRN_WT_622	-	Intergenic	Intergenic
chr1	87866595	87866614	BRN_WT_623	+	Dgkd	Coding_intron
chr1	87944409	87944477	BRN_WT_624	+	Dgkd	UTR3
chr1	87999443	87999460	BRN_WT_625	-	Usp40	Coding_intron
chr1	88022292	88022309	BRN_WT_626	+	Intergenic	Intergenic
chr1	88533049	88533067	BRN_WT_627	+	Intergenic	Intergenic
chr1	88669315	88669331	BRN_WT_628	+	Intergenic	Intergenic
chr1	89539672	89539757	BRN_WT_629	+	Agap1	Coding_intron
chr1	89798135	89798148	BRN_WT_630	+	Agap1	Coding_intron
chr1	89848590	89848604	BRN_WT_631	+	Agap1	Coding_intron
chr1	89890910	89891311	BRN_WT_632	+	Agap1	UTR3
chr1	89893759	89893840	BRN_WT_633	+	Agap1	UTR3
chr1	89895053	89895106	BRN_WT_634	+	Agap1	UTR3
chr1	89895163	89895233	BRN_WT_635	+	Agap1	UTR3
chr1	90152142	90152158	BRN_WT_636	-	Iqca	Coding_intron
chr1	91072059	91072072	BRN_WT_637	-	Intergenic	Intergenic
chr1	91339784	91339799	BRN_WT_638	-	Intergenic	Intergenic
chr1	91425941	91425954	BRN_WT_639	-	Per2	Coding_intron
chr1	91928883	91928941	BRN_WT_640	-	Hdac4	UTR3
chr1	91929491	91929531	BRN_WT_641	-	Hdac4	UTR3
chr1	91929813	91929933	BRN_WT_642	-	Hdac4	UTR3
chr1	91931577	91931687	BRN_WT_643	-	Hdac4	UTR3
chr1	91931825	91931919	BRN_WT_644	-	Hdac4	UTR3
chr1	91932063	91932102	BRN_WT_645	-	Hdac4	UTR3
chr1	91932682	91932714	BRN_WT_646	-	Hdac4	UTR3
chr1	92143742	92143873	BRN_WT_647	-	Hdac4	Coding_intron
chr1	92858548	92858561	BRN_WT_648	+	Gpc1	Coding_cdsexon
chr1	92980711	92980734	BRN_WT_649	-	Intergenic	Intergenic
chr1	93015475	93015682	BRN_WT_650	-	Kif1a	UTR3
chr1	93018025	93018065	BRN_WT_651	-	Kif1a	UTR3
chr1	93018071	93018170	BRN_WT_652	-	Kif1a	UTR3
chr1	93018354	93018400	BRN_WT_653	-	Kif1a	UTR3
chr1	93068870	93068914	BRN_WT_654	-	Kif1a	Coding_intron
chr1	93256198	93256214	BRN_WT_655	-	Intergenic	Intergenic
chr1	93406430	93406448	BRN_WT_656	-	Hdlbp	UTR3
chr1	93410637	93410654	BRN_WT_657	-	Hdlbp	Coding_intron
chr1	93444761	93444777	BRN_WT_658	+	Intergenic	Intergenic
chr1	93504980	93504996	BRN_WT_659	+	2018-09-02	Coding_intron
chr1	93508331	93508422	BRN_WT_660	+	2018-09-02	UTR3
chr1	93508710	93508755	BRN_WT_661	+	2018-09-02	UTR3
chr1	93509243	93509318	BRN_WT_662	+	2018-09-02	UTR3
chr1	93563856	93563875	BRN_WT_663	-	Intergenic	Intergenic
chr1	93686002	93686016	BRN_WT_664	-	Intergenic	Intergenic
chr1	94080829	94080843	BRN_WT_665	-	Intergenic	Intergenic
chr1	94467553	94467644	BRN_WT_666	-	Intergenic	Intergenic
chr1	94467839	94467937	BRN_WT_667	-	Intergenic	Intergenic
chr1	94570264	94570279	BRN_WT_668	-	Intergenic	Intergenic
chr1	95334098	95334159	BRN_WT_669	+	Fam174a	UTR3
chr1	95334211	95334234	BRN_WT_670	+	Fam174a	UTR3
chr1	95334254	95334343	BRN_WT_671	+	Fam174a	UTR3
chr1	95334404	95334505	BRN_WT_672	+	Fam174a	UTR3
chr1	95830754	95830848	BRN_WT_673	-	Intergenic	Intergenic
chr1	95830851	95830981	BRN_WT_674	-	Intergenic	Intergenic
chr1	95831040	95831334	BRN_WT_675	-	Intergenic	Intergenic
chr1	95831412	95831530	BRN_WT_676	-	Intergenic	Intergenic
chr1	95831562	95831606	BRN_WT_677	-	Intergenic	Intergenic
chr1	95832128	95832235	BRN_WT_678	-	Gm22360	Noncoding_exon
chr1	96044618	96044647	BRN_WT_679	-	Intergenic	Intergenic
chr1	96762409	96762442	BRN_WT_680	-	Intergenic	Intergenic
chr1	97645033	97645069	BRN_WT_681	-	D1Ertd622e	UTR3
chr1	97754706	97754752	BRN_WT_682	-	Ppip5k2	Coding_intron
chr1	97821350	97821451	BRN_WT_683	-	Pam	UTR3
chr1	97821636	97821721	BRN_WT_684	-	Pam	UTR3
chr1	98638962	98638986	BRN_WT_685	-	Intergenic	Intergenic
chr1	100180096	100180122	BRN_WT_686	-	Intergenic	Intergenic
chr1	100738881	100738945	BRN_WT_687	+	Intergenic	Intergenic
chr1	102030606	102030619	BRN_WT_688	-	Intergenic	Intergenic
chr1	102817027	102817043	BRN_WT_689	-	Intergenic	Intergenic
chr1	103844651	103844701	BRN_WT_690	+	Intergenic	Intergenic
chr1	104078974	104078989	BRN_WT_691	-	Intergenic	Intergenic
chr1	104355240	104355253	BRN_WT_692	+	Intergenic	Intergenic
chr1	104995292	104995419	BRN_WT_693	+	Cdh20	UTR3
chr1	105070040	105070058	BRN_WT_694	-	Intergenic	Intergenic
chr1	105276973	105277016	BRN_WT_695	-	Rnf152	UTR3
chr1	105280245	105280321	BRN_WT_696	-	Rnf152	UTR3
chr1	105281635	105281704	BRN_WT_697	-	Rnf152	UTR3
chr1	105283671	105283738	BRN_WT_698	-	Rnf152	UTR3
chr1	105699132	105699150	BRN_WT_699	-	Intergenic	Intergenic
chr1	105753898	105753956	BRN_WT_700	+	2310035C23Rik	UTR3
chr1	105764960	105765023	BRN_WT_701	+	Intergenic	Intergenic
chr1	105765065	105765124	BRN_WT_702	+	Intergenic	Intergenic
chr1	106041333	106041346	BRN_WT_703	+	Intergenic	Intergenic
chr1	106132630	106132643	BRN_WT_704	-	Intergenic	Intergenic
chr1	106260288	106260309	BRN_WT_705	+	Phlpp1	Coding_intron
chr1	106393889	106394019	BRN_WT_706	+	Phlpp1	UTR3
chr1	106394101	106394176	BRN_WT_707	+	Phlpp1	UTR3
chr1	106771557	106771657	BRN_WT_708	-	Vps4b	UTR3
chr1	107004928	107004959	BRN_WT_709	-	Intergenic	Intergenic
chr1	107756600	107756670	BRN_WT_710	-	Gm24267	Noncoding_exon
chr1	108266894	108266942	BRN_WT_711	+	Intergenic	Intergenic
chr1	108575158	108575173	BRN_WT_712	-	Intergenic	Intergenic
chr1	109086524	109086564	BRN_WT_713	-	Intergenic	Intergenic
chr1	109225290	109225352	BRN_WT_714	-	Intergenic	Intergenic
chr1	109497530	109497548	BRN_WT_715	-	Intergenic	Intergenic
chr1	110138638	110138683	BRN_WT_716	+	Cdh7	UTR3
chr1	110884471	110884505	BRN_WT_717	-	Intergenic	Intergenic
chr1	110884629	110884691	BRN_WT_718	-	Intergenic	Intergenic
chr1	110884896	110884970	BRN_WT_719	-	Intergenic	Intergenic
chr1	110887411	110887568	BRN_WT_720	-	Intergenic	Intergenic
chr1	111561233	111561252	BRN_WT_721	+	Intergenic	Intergenic
chr1	111758115	111758179	BRN_WT_722	-	Intergenic	Intergenic
chr1	112854100	112854113	BRN_WT_723	+	Intergenic	Intergenic
chr1	113903962	113904151	BRN_WT_724	-	9330185C12Rik	Noncoding_intron
chr1	113932256	113932283	BRN_WT_725	-	9330185C12Rik	Noncoding_intron
chr1	114644232	114644307	BRN_WT_726	+	Intergenic	Intergenic
chr1	116587233	116587286	BRN_WT_727	+	Cntnap5a	UTR3
chr1	116746841	116746921	BRN_WT_728	+	Intergenic	Intergenic
chr1	118730424	118730444	BRN_WT_729	+	Intergenic	Intergenic
chr1	118827322	118827336	BRN_WT_730	-	Intergenic	Intergenic
chr1	119134216	119134234	BRN_WT_731	-	Intergenic	Intergenic
chr1	119303283	119303296	BRN_WT_732	+	Intergenic	Intergenic
chr1	119368744	119368774	BRN_WT_733	-	Intergenic	Intergenic
chr1	119652500	119652556	BRN_WT_734	-	Ptpn4	UTR3
chr1	119652667	119652796	BRN_WT_735	-	Ptpn4	UTR3
chr1	119652867	119653114	BRN_WT_736	-	Ptpn4	UTR3
chr1	119653128	119653194	BRN_WT_737	-	Ptpn4	UTR3
chr1	119653253	119653323	BRN_WT_738	-	Ptpn4	UTR3
chr1	119653369	119653470	BRN_WT_739	-	Ptpn4	UTR3
chr1	119653492	119653788	BRN_WT_740	-	Ptpn4	UTR3
chr1	119653797	119653925	BRN_WT_741	-	Ptpn4	UTR3
chr1	119653928	119654032	BRN_WT_742	-	Ptpn4	UTR3
chr1	119654164	119654365	BRN_WT_743	-	Ptpn4	UTR3
chr1	119654523	119654719	BRN_WT_744	-	Ptpn4	UTR3
chr1	119654822	119655005	BRN_WT_745	-	Ptpn4	UTR3
chr1	119655121	119655529	BRN_WT_746	-	Ptpn4	UTR3
chr1	119655543	119655598	BRN_WT_747	-	Ptpn4	UTR3
chr1	119655753	119655969	BRN_WT_748	-	Ptpn4	UTR3
chr1	119656447	119656556	BRN_WT_749	-	Ptpn4	UTR3
chr1	119656562	119656648	BRN_WT_750	-	Ptpn4	UTR3
chr1	119657025	119657163	BRN_WT_751	-	Ptpn4	UTR3
chr1	119657182	119657243	BRN_WT_752	-	Ptpn4	UTR3
chr1	119657351	119657577	BRN_WT_753	-	Ptpn4	UTR3
chr1	119658089	119658184	BRN_WT_754	-	Ptpn4	UTR3
chr1	119658197	119658314	BRN_WT_755	-	Ptpn4	UTR3
chr1	119658414	119658527	BRN_WT_756	-	Ptpn4	UTR3
chr1	119658577	119658766	BRN_WT_757	-	Ptpn4	UTR3
chr1	119658784	119658856	BRN_WT_758	-	Ptpn4	UTR3
chr1	119658948	119659073	BRN_WT_759	-	Ptpn4	UTR3
chr1	119659098	119659167	BRN_WT_760	-	Ptpn4	UTR3
chr1	119659351	119659390	BRN_WT_761	-	Ptpn4	UTR3
chr1	120141428	120141441	BRN_WT_762	+	3110009E18Rik	Coding_intron
chr1	120459557	120459584	BRN_WT_763	-	Intergenic	Intergenic
chr1	120537328	120537387	BRN_WT_764	+	Intergenic	Intergenic
chr1	121009532	121009555	BRN_WT_765	-	Intergenic	Intergenic
chr1	122193825	122193915	BRN_WT_766	-	Intergenic	Intergenic
chr1	123070293	123070310	BRN_WT_767	-	Intergenic	Intergenic
chr1	123333276	123333388	BRN_WT_768	-	Dpp10	UTR3
chr1	123333512	123333575	BRN_WT_769	-	Dpp10	UTR3
chr1	123333906	123333966	BRN_WT_770	-	Dpp10	UTR3
chr1	123339918	123340065	BRN_WT_771	-	Dpp10	Coding_intron
chr1	123366100	123366117	BRN_WT_772	-	Dpp10	Coding_intron
chr1	123591024	123591139	BRN_WT_773	-	Dpp10	Coding_intron
chr1	123815595	123815677	BRN_WT_774	-	Dpp10	Coding_intron
chr1	123992530	123992711	BRN_WT_775	-	Dpp10	Coding_intron
chr1	124369095	124369134	BRN_WT_776	-	Intergenic	Intergenic
chr1	124406850	124407012	BRN_WT_777	-	Intergenic	Intergenic
chr1	124468431	124468504	BRN_WT_778	-	Intergenic	Intergenic
chr1	124468817	124468888	BRN_WT_779	-	Intergenic	Intergenic
chr1	124480127	124480202	BRN_WT_780	-	Intergenic	Intergenic
chr1	124524812	124524867	BRN_WT_781	-	Gm28928	Noncoding_intron
chr1	124524875	124524950	BRN_WT_782	-	Gm28928	Noncoding_intron
chr1	124585572	124585644	BRN_WT_783	-	Gm28928	Noncoding_intron
chr1	124694518	124694607	BRN_WT_784	-	Gm28928	Noncoding_intron
chr1	124754588	124754624	BRN_WT_785	-	Gm28928	Noncoding_intron
chr1	124784686	124784884	BRN_WT_786	-	Gm28928	Noncoding_intron
chr1	125365991	125366006	BRN_WT_787	-	Intergenic	Intergenic
chr1	125409654	125409725	BRN_WT_788	-	Actr3	Coding_intron
chr1	125722607	125722623	BRN_WT_789	+	Gpr39	Coding_intron
chr1	125914480	125914530	BRN_WT_790	-	Nckap5	UTR3
chr1	127222507	127222522	BRN_WT_791	+	Mgat5	Coding_intron
chr1	127278774	127278835	BRN_WT_792	+	Mgat5	Coding_intron
chr1	127295432	127295487	BRN_WT_793	+	Mgat5	Coding_intron
chr1	127579122	127579193	BRN_WT_794	-	Tmem163	Coding_intron
chr1	127610327	127610407	BRN_WT_795	-	Tmem163	Coding_intron
chr1	127619676	127619810	BRN_WT_796	-	Tmem163	Coding_intron
chr1	127619935	127620105	BRN_WT_797	-	Tmem163	Coding_intron
chr1	127688869	127688882	BRN_WT_798	-	Intergenic	Intergenic
chr1	127789530	127789617	BRN_WT_799	+	Ccnt2	Coding_intron
chr1	127805148	127805172	BRN_WT_800	+	Ccnt2	UTR3
chr1	127838818	127838836	BRN_WT_801	-	Map3k19	Coding_intron
chr1	127847549	127847598	BRN_WT_802	-	Intergenic	Intergenic
chr1	127928884	127928943	BRN_WT_803	+	Rab3gap1	Coding_intron
chr1	128170865	128170931	BRN_WT_804	+	R3hdm1	Coding_intron
chr1	128197008	128197022	BRN_WT_805	-	Intergenic	Intergenic
chr1	128202403	128202426	BRN_WT_806	+	R3hdm1	Coding_intron
chr1	128278403	128278447	BRN_WT_807	+	Ubxn4	UTR3
chr1	128358479	128358494	BRN_WT_808	-	Mcm6	Coding_intron
chr1	128793652	128793666	BRN_WT_809	+	Intergenic	Intergenic
chr1	129468932	129469064	BRN_WT_810	+	Thsd7b	Coding_intron
chr1	130121960	130122022	BRN_WT_811	-	Intergenic	Intergenic
chr1	130158866	130158900	BRN_WT_812	+	Thsd7b	Coding_intron
chr1	130568569	130568583	BRN_WT_813	+	Intergenic	Intergenic
chr1	130721410	130721463	BRN_WT_814	+	Yod1	UTR3
chr1	131101091	131101104	BRN_WT_815	+	Intergenic	Intergenic
chr1	131147091	131147120	BRN_WT_816	+	Intergenic	Intergenic
chr1	131161948	131161962	BRN_WT_817	+	Eif2d	Coding_intron
chr1	131268213	131268227	BRN_WT_818	+	Intergenic	Intergenic
chr1	131340658	131340675	BRN_WT_819	-	Srgap2	Coding_intron
chr1	131398201	131398220	BRN_WT_820	-	Srgap2	Coding_intron
chr1	131642509	131642538	BRN_WT_821	+	Ctse	Coding_intron
chr1	131757806	131757861	BRN_WT_822	-	Intergenic	Intergenic
chr1	131932674	131932822	BRN_WT_823	+	Nucks1	UTR3
chr1	131935176	131935546	BRN_WT_824	+	Nucks1	UTR3
chr1	132030151	132030227	BRN_WT_825	+	Elk4	Coding_intron
chr1	132296082	132296103	BRN_WT_826	+	Intergenic	Intergenic
chr1	132298973	132298992	BRN_WT_827	-	Intergenic	Intergenic
chr1	132356717	132356766	BRN_WT_828	-	Tmcc2	UTR3
chr1	132465043	132465095	BRN_WT_829	+	Dstyk	UTR3
chr1	132466604	132466706	BRN_WT_830	+	Dstyk	UTR3
chr1	132505482	132505588	BRN_WT_831	+	Rbbp5	UTR3
chr1	132584675	132584692	BRN_WT_832	-	Nfasc	Coding_intron
chr1	133034326	133034362	BRN_WT_833	-	Intergenic	Intergenic
chr1	133139520	133139563	BRN_WT_834	+	Ppp1r15b	UTR3
chr1	133171941	133171975	BRN_WT_835	+	Intergenic	Intergenic
chr1	133172148	133172180	BRN_WT_836	+	Intergenic	Intergenic
chr1	133296128	133296141	BRN_WT_837	-	Intergenic	Intergenic
chr1	133303085	133303151	BRN_WT_838	+	Plekha6	UTR3
chr1	133702715	133702758	BRN_WT_839	-	Atp2b4	UTR3
chr1	133702777	133703205	BRN_WT_840	-	Atp2b4	UTR3
chr1	133703312	133703494	BRN_WT_841	-	Atp2b4	UTR3
chr1	133704184	133704318	BRN_WT_842	-	Atp2b4	UTR3
chr1	133704468	133704512	BRN_WT_843	-	Atp2b4	UTR3
chr1	133704595	133704693	BRN_WT_844	-	Atp2b4	UTR3
chr1	133705345	133705408	BRN_WT_845	-	Atp2b4	UTR3
chr1	133706537	133706588	BRN_WT_846	-	Atp2b4	UTR3
chr1	134143458	134143475	BRN_WT_847	-	Intergenic	Intergenic
chr1	134751604	134751661	BRN_WT_848	+	Syt2	UTR3
chr1	134953076	134953183	BRN_WT_849	-	Ppp1r12b	Coding_intron
chr1	135155443	135155632	BRN_WT_850	+	Arl8a	UTR3
chr1	135155653	135155735	BRN_WT_851	+	Arl8a	UTR3
chr1	135155964	135156026	BRN_WT_852	+	Arl8a	UTR3
chr1	135156132	135156215	BRN_WT_853	+	Arl8a	UTR3
chr1	135411431	135411451	BRN_WT_854	+	Intergenic	Intergenic
chr1	135932292	135932305	BRN_WT_855	+	Intergenic	Intergenic
chr1	135964702	135964720	BRN_WT_856	-	Igfn1	Coding_cdsexon
chr1	136093335	136093348	BRN_WT_857	+	Cacna1s	Coding_intron
chr1	136174998	136175082	BRN_WT_858	+	Kif21b	UTR3
chr1	136177853	136177978	BRN_WT_859	+	Kif21b	UTR3
chr1	136229267	136229282	BRN_WT_860	-	5730559C18Rik	Coding_intron
chr1	136268681	136268875	BRN_WT_861	-	Camsap2	UTR3
chr1	136268961	136269063	BRN_WT_862	-	Camsap2	UTR3
chr1	136269069	136269651	BRN_WT_863	-	Camsap2	UTR3
chr1	136269760	136269858	BRN_WT_864	-	Camsap2	UTR3
chr1	136270150	136270286	BRN_WT_865	-	Camsap2	UTR3
chr1	136270361	136270493	BRN_WT_866	-	Camsap2	UTR3
chr1	136298277	136298335	BRN_WT_867	-	Camsap2	Coding_intron
chr1	136345487	136345550	BRN_WT_868	-	Camsap2	UTR5
chr1	136365161	136365187	BRN_WT_869	+	Intergenic	Intergenic
chr1	136495856	136495871	BRN_WT_870	+	Kif14	Coding_cdsexon
chr1	136602663	136602679	BRN_WT_871	-	Intergenic	Intergenic
chr1	136628109	136628148	BRN_WT_872	+	Zfp281	UTR3
chr1	136846974	136846988	BRN_WT_873	+	Intergenic	Intergenic
chr1	137966467	137966490	BRN_WT_874	+	Mir181a-1	Noncoding_exon
chr1	138245996	138246009	BRN_WT_875	-	Intergenic	Intergenic
chr1	138291138	138291172	BRN_WT_876	-	Intergenic	Intergenic
chr1	138484133	138484315	BRN_WT_877	-	Nek7	UTR3
chr1	138485372	138485394	BRN_WT_878	-	Nek7	UTR3
chr1	138486083	138486270	BRN_WT_879	-	Nek7	UTR3
chr1	138486488	138486590	BRN_WT_880	-	Nek7	UTR3
chr1	139174603	139174671	BRN_WT_881	+	Dennd1b	UTR3
chr1	139356134	139356183	BRN_WT_882	-	Crb1	Coding_intron
chr1	139422266	139422288	BRN_WT_883	+	Intergenic	Intergenic
chr1	139447843	139447957	BRN_WT_884	+	Zbtb41	UTR3
chr1	139449063	139449156	BRN_WT_885	+	Zbtb41	UTR3
chr1	139449341	139449393	BRN_WT_886	+	Zbtb41	UTR3
chr1	139449624	139449705	BRN_WT_887	+	Zbtb41	UTR3
chr1	139449789	139449844	BRN_WT_888	+	Zbtb41	UTR3
chr1	139450246	139450308	BRN_WT_889	+	Zbtb41	UTR3
chr1	139450350	139450554	BRN_WT_890	+	Zbtb41	UTR3
chr1	139450664	139450707	BRN_WT_891	+	Zbtb41	UTR3
chr1	139452709	139452736	BRN_WT_892	+	Zbtb41	UTR3
chr1	140256561	140256575	BRN_WT_893	-	Intergenic	Intergenic
chr1	140722583	140722600	BRN_WT_894	+	Intergenic	Intergenic
chr1	143608114	143608265	BRN_WT_895	-	Cdc73	UTR3
chr1	143647377	143647535	BRN_WT_896	+	B3galt2	UTR3
chr1	143647869	143647922	BRN_WT_897	+	B3galt2	UTR3
chr1	143648347	143648406	BRN_WT_898	+	B3galt2	UTR3
chr1	143684553	143684617	BRN_WT_899	+	Intergenic	Intergenic
chr1	143739696	143739710	BRN_WT_900	+	Glrx2	Coding_cdsexon
chr1	143752499	143752562	BRN_WT_901	-	Trove2	UTR3
chr1	143753223	143753285	BRN_WT_902	-	Trove2	UTR3
chr1	143754678	143754752	BRN_WT_903	-	Trove2	UTR3
chr1	143755025	143755139	BRN_WT_904	-	Trove2	UTR3
chr1	143755290	143755412	BRN_WT_905	-	Trove2	UTR3
chr1	143755741	143755798	BRN_WT_906	-	Trove2	UTR3
chr1	143755863	143756032	BRN_WT_907	-	Trove2	UTR3
chr1	143756214	143756568	BRN_WT_908	-	Trove2	UTR3
chr1	143756701	143756918	BRN_WT_909	-	Trove2	UTR3
chr1	143756924	143756987	BRN_WT_910	-	Trove2	UTR3
chr1	145133389	145133408	BRN_WT_911	-	Intergenic	Intergenic
chr1	146363772	146363784	BRN_WT_912	-	Intergenic	Intergenic
chr1	146452888	146452969	BRN_WT_913	-	Gm29514	Noncoding_intron
chr1	146600633	146600698	BRN_WT_914	+	Brinp3	Coding_intron
chr1	146610891	146610918	BRN_WT_915	+	Brinp3	Coding_intron
chr1	147151069	147151084	BRN_WT_916	+	Intergenic	Intergenic
chr1	147607277	147607292	BRN_WT_917	+	Intergenic	Intergenic
chr1	148094758	148094802	BRN_WT_918	-	Intergenic	Intergenic
chr1	149558013	149558036	BRN_WT_919	-	Intergenic	Intergenic
chr1	150362143	150362207	BRN_WT_920	-	BC003331	UTR3
chr1	151062003	151062075	BRN_WT_921	-	Gm22756	Noncoding_exon
chr1	151122757	151122770	BRN_WT_922	+	Intergenic	Intergenic
chr1	151363371	151363557	BRN_WT_923	+	Ivns1abp	UTR3
chr1	151691401	151691449	BRN_WT_924	-	Intergenic	Intergenic
chr1	151821529	151821666	BRN_WT_925	+	Edem3	UTR3
chr1	151821939	151822173	BRN_WT_926	+	Intergenic	Intergenic
chr1	152516989	152517054	BRN_WT_927	-	Rgl1	UTR3
chr1	152517407	152517475	BRN_WT_928	-	Rgl1	UTR3
chr1	152518665	152518716	BRN_WT_929	-	Rgl1	UTR3
chr1	152880008	152880094	BRN_WT_930	-	Smg7	Coding_intron
chr1	153026663	153026694	BRN_WT_931	-	Intergenic	Intergenic
chr1	153219945	153219996	BRN_WT_932	-	Lamc1	UTR3
chr1	153456290	153456362	BRN_WT_933	-	Dhx9	Coding_cdsexon
chr1	153693241	153693272	BRN_WT_934	+	Rgs8	UTR3
chr1	153900033	153900052	BRN_WT_935	+	Glul	UTR5
chr1	153902994	153903067	BRN_WT_936	+	Glul	Coding_cdsexon
chr1	153908175	153908552	BRN_WT_937	+	Glul	UTR3
chr1	153908723	153909052	BRN_WT_938	+	Glul	UTR3
chr1	153909062	153909131	BRN_WT_939	+	Glul	UTR3
chr1	153909177	153909433	BRN_WT_940	+	Glul	UTR3
chr1	153909460	153909689	BRN_WT_941	+	Glul	UTR3
chr1	154394555	154394590	BRN_WT_942	-	Cacna1e	UTR3
chr1	154395866	154395920	BRN_WT_943	-	Cacna1e	UTR3
chr1	154460850	154460913	BRN_WT_944	-	Cacna1e	Coding_intron
chr1	154597962	154598025	BRN_WT_945	-	Cacna1e	Coding_intron
chr1	154831365	154831382	BRN_WT_946	-	Cacna1e	Noncoding_intron
chr1	154859332	154859394	BRN_WT_947	+	Intergenic	Intergenic
chr1	155060586	155060600	BRN_WT_948	+	Intergenic	Intergenic
chr1	155180860	155180873	BRN_WT_949	+	Stx6	Coding_intron
chr1	155240594	155240607	BRN_WT_950	-	BC034090	Coding_intron
chr1	155278785	155278838	BRN_WT_951	-	Xpr1	UTR3
chr1	155417049	155417061	BRN_WT_952	+	Intergenic	Intergenic
chr1	155545185	155545201	BRN_WT_953	-	Intergenic	Intergenic
chr1	155844970	155845055	BRN_WT_954	-	Cep350	UTR3
chr1	155906452	155906468	BRN_WT_955	-	Cep350	Coding_intron
chr1	155954573	155954650	BRN_WT_956	+	Gm23744	Noncoding_exon
chr1	156005752	156005856	BRN_WT_957	-	Tor1aip1	UTR3
chr1	156018555	156018575	BRN_WT_958	-	Tor1aip1	Coding_intron
chr1	156307853	156307891	BRN_WT_959	+	Intergenic	Intergenic
chr1	156425134	156425166	BRN_WT_960	-	Soat1	UTR3
chr1	156526392	156526443	BRN_WT_961	+	Gm10031	UTR3
chr1	156526554	156526601	BRN_WT_962	+	Gm10031	UTR3
chr1	156533871	156533979	BRN_WT_963	+	Intergenic	Intergenic
chr1	156602901	156602962	BRN_WT_964	+	Abl2	Coding_intron
chr1	156912004	156912221	BRN_WT_965	-	Ralgps2	Coding_intron
chr1	156934047	156934063	BRN_WT_966	-	Ralgps2	Coding_intron
chr1	157135217	157135353	BRN_WT_967	-	Rasal2	UTR3
chr1	157136063	157136194	BRN_WT_968	-	Rasal2	UTR3
chr1	157139219	157139288	BRN_WT_969	-	Rasal2	UTR3
chr1	157140232	157140395	BRN_WT_970	-	Rasal2	UTR3
chr1	157140414	157140510	BRN_WT_971	-	Rasal2	UTR3
chr1	157394044	157394083	BRN_WT_972	-	Rasal2	Coding_intron
chr1	157540323	157540385	BRN_WT_973	-	Intergenic	Intergenic
chr1	158261870	158262023	BRN_WT_974	-	Brinp2	Coding_intron
chr1	158595829	158595897	BRN_WT_975	+	Astn1	Coding_intron
chr1	158679464	158679549	BRN_WT_976	+	Astn1	Coding_intron
chr1	158689572	158689649	BRN_WT_977	+	Astn1	UTR3
chr1	158728306	158728326	BRN_WT_978	+	Intergenic	Intergenic
chr1	159067573	159067586	BRN_WT_979	-	Intergenic	Intergenic
chr1	159578405	159578422	BRN_WT_980	-	Intergenic	Intergenic
chr1	159820871	159820963	BRN_WT_981	+	Tnr	Coding_intron
chr1	159867204	159867329	BRN_WT_982	+	Tnr	Coding_intron
chr1	160025478	160025491	BRN_WT_983	+	Intergenic	Intergenic
chr1	160156046	160156059	BRN_WT_984	+	Intergenic	Intergenic
chr1	160223033	160223129	BRN_WT_985	-	Rabgap1l	UTR3
chr1	160331706	160331721	BRN_WT_986	-	Rabgap1l	Coding_intron
chr1	160968146	160968214	BRN_WT_987	+	Rc3h1	UTR3
chr1	161170179	161170211	BRN_WT_988	+	Ankrd45	UTR3
chr1	161170327	161170420	BRN_WT_989	+	Ankrd45	UTR3
chr1	161241206	161241313	BRN_WT_990	-	Prdx6	UTR3
chr1	161351398	161351416	BRN_WT_991	-	Intergenic	Intergenic
chr1	161987582	161987661	BRN_WT_992	-	Dnm3	UTR3
chr1	161987899	161988066	BRN_WT_993	-	Dnm3	UTR3
chr1	161988689	161988778	BRN_WT_994	-	Dnm3	UTR3
chr1	161988830	161989089	BRN_WT_995	-	Dnm3	UTR3
chr1	161989093	161989291	BRN_WT_996	-	Dnm3	UTR3
chr1	161989757	161989801	BRN_WT_997	-	Dnm3	UTR3
chr1	161990018	161990121	BRN_WT_998	-	Dnm3	UTR3
chr1	161991723	161991793	BRN_WT_999	-	Dnm3	UTR3
chr1	161991849	161991956	BRN_WT_1000	-	Dnm3	UTR3
chr1	162594781	162594940	BRN_WT_1001	+	Vamp4	UTR3
chr1	162595099	162595120	BRN_WT_1002	+	Vamp4	UTR3
chr1	162598736	162598816	BRN_WT_1003	+	Vamp4	UTR3
chr1	162598850	162598877	BRN_WT_1004	+	Vamp4	UTR3
chr1	162649576	162649655	BRN_WT_1005	+	Myoc	UTR3
chr1	162671796	162672003	BRN_WT_1006	-	Prrc2c	UTR3
chr1	162672060	162672153	BRN_WT_1007	-	Prrc2c	UTR3
chr1	162672243	162672446	BRN_WT_1008	-	Prrc2c	UTR3
chr1	162673088	162673192	BRN_WT_1009	-	Prrc2c	UTR3
chr1	162681267	162681280	BRN_WT_1010	-	Prrc2c	Coding_cdsexon
chr1	162697646	162697711	BRN_WT_1011	-	Prrc2c	Coding_cdsexon
chr1	162705624	162705684	BRN_WT_1012	-	Prrc2c	Coding_cdsexon
chr1	162710391	162710521	BRN_WT_1013	-	Prrc2c	Coding_cdsexon
chr1	162710560	162710606	BRN_WT_1014	-	Prrc2c	Coding_cdsexon
chr1	163245139	163245224	BRN_WT_1015	-	Prrx1	UTR3
chr1	163246890	163246919	BRN_WT_1016	-	Prrx1	UTR3
chr1	163247935	163248033	BRN_WT_1017	-	Prrx1	UTR3
chr1	163894810	163894832	BRN_WT_1018	-	Intergenic	Intergenic
chr1	163915957	163915978	BRN_WT_1019	+	Kifap3	UTR3
chr1	163916325	163916435	BRN_WT_1020	+	Kifap3	UTR3
chr1	163930301	163930314	BRN_WT_1021	-	Intergenic	Intergenic
chr1	163943072	163943220	BRN_WT_1022	+	Scyl3	Coding_intron
chr1	164437123	164438338	BRN_WT_1023	-	Atp1b1	UTR3
chr1	164457732	164457760	BRN_WT_1024	-	Atp1b1	Coding_intron
chr1	164667913	164667927	BRN_WT_1025	+	Intergenic	Intergenic
chr1	165288189	165288205	BRN_WT_1026	+	Intergenic	Intergenic
chr1	165641642	165641665	BRN_WT_1027	+	Intergenic	Intergenic
chr1	165642310	165642333	BRN_WT_1028	-	Intergenic	Intergenic
chr1	165832583	165832665	BRN_WT_1029	-	Intergenic	Intergenic
chr1	165865664	165865728	BRN_WT_1030	-	Pou2f1	UTR3
chr1	165866225	165866289	BRN_WT_1031	-	Pou2f1	UTR3
chr1	165866342	165866449	BRN_WT_1032	-	Pou2f1	UTR3
chr1	165866479	165866515	BRN_WT_1033	-	Pou2f1	UTR3
chr1	165867127	165867196	BRN_WT_1034	-	Pou2f1	UTR3
chr1	165875151	165875215	BRN_WT_1035	-	Pou2f1	UTR3
chr1	165906684	165906756	BRN_WT_1036	-	Pou2f1	Coding_cdsexon
chr1	166379669	166379683	BRN_WT_1037	+	Tada1	Coding_intron
chr1	166385040	166385058	BRN_WT_1038	+	Tada1	Coding_intron
chr1	167029749	167029778	BRN_WT_1039	+	Fam78b	Coding_intron
chr1	167284131	167284145	BRN_WT_1040	-	Uck2	Coding_intron
chr1	167349025	167349131	BRN_WT_1041	+	Gm24182	Noncoding_exon
chr1	167502771	167502916	BRN_WT_1042	+	Intergenic	Intergenic
chr1	167560476	167560494	BRN_WT_1043	+	Intergenic	Intergenic
chr1	167811302	167811321	BRN_WT_1044	+	Lmx1a	Coding_intron
chr1	167816698	167816716	BRN_WT_1045	+	Lmx1a	Coding_intron
chr1	168082348	168082365	BRN_WT_1046	+	Gm20711	Noncoding_intron
chr1	168342685	168342739	BRN_WT_1047	-	Pbx1	Coding_intron
chr1	168965114	168965126	BRN_WT_1048	-	Intergenic	Intergenic
chr1	169693386	169693489	BRN_WT_1049	+	Rgs5	UTR3
chr1	169694021	169694156	BRN_WT_1050	+	Rgs5	UTR3
chr1	169694170	169694207	BRN_WT_1051	+	Rgs5	UTR3
chr1	169741540	169741669	BRN_WT_1052	-	Rgs4	UTR3
chr1	169741730	169741911	BRN_WT_1053	-	Rgs4	UTR3
chr1	169742080	169742197	BRN_WT_1054	-	Rgs4	UTR3
chr1	169743088	169743299	BRN_WT_1055	-	Rgs4	UTR3
chr1	169743419	169743608	BRN_WT_1056	-	Rgs4	UTR3
chr1	170193568	170193777	BRN_WT_1057	-	Uhmk1	UTR3
chr1	170195514	170195609	BRN_WT_1058	-	Uhmk1	UTR3
chr1	170198202	170198387	BRN_WT_1059	-	Uhmk1	UTR3
chr1	170199147	170199257	BRN_WT_1060	-	Uhmk1	UTR3
chr1	170199302	170199514	BRN_WT_1061	-	Uhmk1	UTR3
chr1	170199585	170199695	BRN_WT_1062	-	Uhmk1	UTR3
chr1	170314341	170314372	BRN_WT_1063	-	Nos1ap	Noncoding_intron
chr1	170324043	170324218	BRN_WT_1064	-	Nos1ap	Coding_intron
chr1	170470396	170470449	BRN_WT_1065	-	Nos1ap	Coding_intron
chr1	170707494	170707538	BRN_WT_1066	-	Atf6	UTR3
chr1	171037026	171037091	BRN_WT_1067	-	Intergenic	Intergenic
chr1	171057865	171057882	BRN_WT_1068	-	Fcgr3	Coding_cdsexon
chr1	171065355	171065423	BRN_WT_1069	-	Intergenic	Intergenic
chr1	171072990	171073055	BRN_WT_1070	-	Intergenic	Intergenic
chr1	171073686	171073701	BRN_WT_1071	+	Intergenic	Intergenic
chr1	171074301	171074373	BRN_WT_1072	+	Intergenic	Intergenic
chr1	171079945	171080019	BRN_WT_1073	-	Intergenic	Intergenic
chr1	171080604	171080669	BRN_WT_1074	-	Intergenic	Intergenic
chr1	171081875	171081947	BRN_WT_1075	+	Intergenic	Intergenic
chr1	171192449	171192463	BRN_WT_1076	-	Pcp4l1	Coding_intron
chr1	171231311	171231328	BRN_WT_1077	+	Intergenic	Intergenic
chr1	171281988	171282070	BRN_WT_1078	-	Usp21	UTR3
chr1	171533101	171533178	BRN_WT_1079	+	Intergenic	Intergenic
chr1	171695374	171695410	BRN_WT_1080	+	Cd48	Coding_intron
chr1	172179276	172179294	BRN_WT_1081	-	Intergenic	Intergenic
chr1	172197214	172197328	BRN_WT_1082	-	Pea15a	UTR3
chr1	172197345	172197522	BRN_WT_1083	-	Pea15a	UTR3
chr1	172197676	172197715	BRN_WT_1084	-	Pea15a	UTR3
chr1	172274070	172274163	BRN_WT_1085	-	Atp1a2	UTR3
chr1	172370176	172370336	BRN_WT_1086	+	Kcnj10	UTR3
chr1	172371148	172371212	BRN_WT_1087	+	Kcnj10	UTR3
chr1	172372804	172373026	BRN_WT_1088	+	Kcnj10	UTR3
chr1	172373698	172373774	BRN_WT_1089	+	Kcnj10	UTR3
chr1	172373903	172373950	BRN_WT_1090	+	Kcnj10	UTR3
chr1	172633127	172633140	BRN_WT_1091	+	Intergenic	Intergenic
chr1	173334883	173335028	BRN_WT_1092	-	Cadm3	UTR3
chr1	173335780	173335920	BRN_WT_1093	-	Cadm3	UTR3
chr1	173336022	173336105	BRN_WT_1094	-	Cadm3	UTR3
chr1	173336696	173336891	BRN_WT_1095	-	Cadm3	UTR3
chr1	173336898	173336959	BRN_WT_1096	-	Cadm3	UTR3
chr1	173362775	173362910	BRN_WT_1097	-	Cadm3	Coding_intron
chr1	173466700	173466715	BRN_WT_1098	+	Intergenic	Intergenic
chr1	173851913	173851961	BRN_WT_1099	-	Intergenic	Intergenic
chr1	174504216	174504229	BRN_WT_1100	-	Intergenic	Intergenic
chr1	174590578	174590637	BRN_WT_1101	+	Fmn2	Coding_intron
chr1	174634543	174634739	BRN_WT_1102	+	Fmn2	Coding_intron
chr1	174755493	174755506	BRN_WT_1103	-	Intergenic	Intergenic
chr1	174821855	174821925	BRN_WT_1104	+	Fmn2	UTR3
chr1	174822493	174822638	BRN_WT_1105	+	Fmn2	UTR3
chr1	175179877	175179977	BRN_WT_1106	-	Rgs7	Coding_intron
chr1	175266820	175266914	BRN_WT_1107	-	Rgs7	Coding_intron
chr1	175322620	175322638	BRN_WT_1108	-	Rgs7	Coding_intron
chr1	175419790	175419882	BRN_WT_1109	-	Rgs7	Coding_intron
chr1	175602996	175603072	BRN_WT_1110	+	Intergenic	Intergenic
chr1	175734463	175734476	BRN_WT_1111	-	Intergenic	Intergenic
chr1	175904544	175904628	BRN_WT_1112	+	Exo1	Coding_intron
chr1	176734547	176734680	BRN_WT_1113	-	Cep170	UTR3
chr1	176734733	176734768	BRN_WT_1114	-	Cep170	UTR3
chr1	176734977	176735100	BRN_WT_1115	-	Cep170	UTR3
chr1	176937844	176937861	BRN_WT_1116	+	Sdccag8	Coding_intron
chr1	177374579	177374640	BRN_WT_1117	+	Intergenic	Intergenic
chr1	177442416	177442514	BRN_WT_1118	+	Zbtb18	UTR5
chr1	177448111	177448168	BRN_WT_1119	+	Zbtb18	Coding_cdsexon
chr1	177448720	177448923	BRN_WT_1120	+	Zbtb18	UTR3
chr1	177448950	177449177	BRN_WT_1121	+	Zbtb18	UTR3
chr1	177449257	177449606	BRN_WT_1122	+	Zbtb18	UTR3
chr1	177449638	177449711	BRN_WT_1123	+	Zbtb18	UTR3
chr1	177449741	177449782	BRN_WT_1124	+	Zbtb18	UTR3
chr1	177449866	177449962	BRN_WT_1125	+	Zbtb18	UTR3
chr1	177450219	177450296	BRN_WT_1126	+	Zbtb18	UTR3
chr1	177450307	177450384	BRN_WT_1127	+	Zbtb18	UTR3
chr1	177450551	177450681	BRN_WT_1128	+	Zbtb18	UTR3
chr1	177450695	177450752	BRN_WT_1129	+	Zbtb18	UTR3
chr1	177985543	177985605	BRN_WT_1130	+	Gm16432	Noncoding_intron
chr1	178028032	178028139	BRN_WT_1131	-	Gm25312	Noncoding_exon
chr1	178299830	178299917	BRN_WT_1132	+	Intergenic	Intergenic
chr1	178300077	178300191	BRN_WT_1133	+	Intergenic	Intergenic
chr1	178329086	178329180	BRN_WT_1134	-	Hnrnpu	UTR3
chr1	178335713	178335784	BRN_WT_1135	-	Gm28062	Coding_intron
chr1	178349538	178349551	BRN_WT_1136	-	Intergenic	Intergenic
chr1	178539697	178539768	BRN_WT_1137	+	Kif26b	Coding_intron
chr1	178738183	178738199	BRN_WT_1138	+	Kif26b	Coding_intron
chr1	179152204	179152221	BRN_WT_1139	+	Intergenic	Intergenic
chr1	179280886	179280898	BRN_WT_1140	-	Smyd3	Coding_intron
chr1	179960875	179960952	BRN_WT_1141	+	Cdc42bpa	UTR5
chr1	179966641	179967023	BRN_WT_1142	+	Cdc42bpa	Coding_intron
chr1	179967073	179967128	BRN_WT_1143	+	Cdc42bpa	Coding_intron
chr1	180162267	180162397	BRN_WT_1144	+	Cdc42bpa	UTR3
chr1	180162460	180162572	BRN_WT_1145	+	Cdc42bpa	UTR3
chr1	180162599	180162659	BRN_WT_1146	+	Cdc42bpa	UTR3
chr1	180164536	180164634	BRN_WT_1147	+	Cdc42bpa	UTR3
chr1	180164740	180164768	BRN_WT_1148	+	Cdc42bpa	UTR3
chr1	180165246	180165415	BRN_WT_1149	+	Cdc42bpa	UTR3
chr1	180198148	180198166	BRN_WT_1150	-	Adck3	Coding_intron
chr1	180301926	180301939	BRN_WT_1151	+	Intergenic	Intergenic
chr1	180432390	180432630	BRN_WT_1152	-	6330403A02Rik	UTR3
chr1	180432860	180432930	BRN_WT_1153	-	6330403A02Rik	UTR3
chr1	180432963	180433095	BRN_WT_1154	-	6330403A02Rik	UTR3
chr1	180435467	180435515	BRN_WT_1155	-	6330403A02Rik	UTR3
chr1	180435566	180435616	BRN_WT_1156	-	6330403A02Rik	UTR3
chr1	180556303	180556336	BRN_WT_1157	+	Intergenic	Intergenic
chr1	180753471	180753528	BRN_WT_1158	+	Acbd3	UTR3
chr1	180753804	180753894	BRN_WT_1159	+	Acbd3	UTR3
chr1	180762297	180762312	BRN_WT_1160	+	Intergenic	Intergenic
chr1	181093334	181093376	BRN_WT_1161	+	Intergenic	Intergenic
chr1	181093505	181093524	BRN_WT_1162	+	Intergenic	Intergenic
chr1	181211383	181211423	BRN_WT_1163	-	Wdr26	Coding_cdsexon
chr1	181688351	181688366	BRN_WT_1164	+	Intergenic	Intergenic
chr1	181813606	181813644	BRN_WT_1165	-	Gm23690	Noncoding_exon
chr1	181898950	181898986	BRN_WT_1166	-	Enah	UTR3
chr1	181904356	181904482	BRN_WT_1167	-	Enah	UTR3
chr1	181904839	181904961	BRN_WT_1168	-	Enah	UTR3
chr1	181904988	181905090	BRN_WT_1169	-	Enah	UTR3
chr1	181905393	181905459	BRN_WT_1170	-	Enah	UTR3
chr1	182020116	182020137	BRN_WT_1171	-	Intergenic	Intergenic
chr1	182467895	182468003	BRN_WT_1172	-	Capn2	UTR3
chr1	182482353	182482368	BRN_WT_1173	+	Intergenic	Intergenic
chr1	182629722	182629751	BRN_WT_1174	+	Capn8	Coding_intron
chr1	182629852	182629901	BRN_WT_1175	+	Capn8	Coding_intron
chr1	182774322	182774341	BRN_WT_1176	-	Intergenic	Intergenic
chr1	182786764	182786778	BRN_WT_1177	+	Susd4	Coding_intron
chr1	183205001	183205030	BRN_WT_1178	-	Disp1	Coding_intron
chr1	183231952	183231975	BRN_WT_1179	-	Intergenic	Intergenic
chr1	183252509	183252528	BRN_WT_1180	+	Intergenic	Intergenic
chr1	183838588	183838633	BRN_WT_1181	+	Intergenic	Intergenic
chr1	184328110	184328123	BRN_WT_1182	-	Intergenic	Intergenic
chr1	184453379	184453393	BRN_WT_1183	-	Intergenic	Intergenic
chr1	184813702	184813764	BRN_WT_1184	-	2018-03-02	UTR3
chr1	184896889	184897005	BRN_WT_1185	-	Mark1	UTR3
chr1	184898192	184898335	BRN_WT_1186	-	Mark1	UTR3
chr1	184898339	184898399	BRN_WT_1187	-	Mark1	UTR3
chr1	185089134	185089147	BRN_WT_1188	+	4930433J02Rik	Noncoding_intron
chr1	185284255	185284328	BRN_WT_1189	+	Rab3gap2	UTR3
chr1	185286320	185286460	BRN_WT_1190	+	Rab3gap2	UTR3
chr1	185286765	185286916	BRN_WT_1191	-	Iars2	UTR3
chr1	186405646	186405662	BRN_WT_1192	+	Intergenic	Intergenic
chr1	186608271	186608285	BRN_WT_1193	-	Intergenic	Intergenic
chr1	186731913	186731976	BRN_WT_1194	-	Rrp15	Coding_intron
chr1	187214518	187214531	BRN_WT_1195	+	Intergenic	Intergenic
chr1	187289421	187289437	BRN_WT_1196	-	Intergenic	Intergenic
chr1	187997677	187997689	BRN_WT_1197	-	Intergenic	Intergenic
chr1	188130873	188131022	BRN_WT_1198	+	Esrrg	Coding_intron
chr1	188211991	188212101	BRN_WT_1199	+	Esrrg	UTR3
chr1	188212915	188212941	BRN_WT_1200	+	Esrrg	UTR3
chr1	188213026	188213181	BRN_WT_1201	+	Esrrg	UTR3
chr1	188213313	188213416	BRN_WT_1202	+	Esrrg	UTR3
chr1	188213419	188213447	BRN_WT_1203	+	Esrrg	UTR3
chr1	188213546	188213665	BRN_WT_1204	+	Esrrg	UTR3
chr1	188214181	188214249	BRN_WT_1205	+	Esrrg	UTR3
chr1	188214633	188214685	BRN_WT_1206	+	Esrrg	UTR3
chr1	188246356	188246385	BRN_WT_1207	-	Intergenic	Intergenic
chr1	188935613	188935630	BRN_WT_1208	+	Ush2a	Coding_intron
chr1	188986142	188986177	BRN_WT_1209	-	Kctd3	Coding_intron
chr1	189208073	189208138	BRN_WT_1210	-	Kcnk2	UTR3
chr1	190118301	190118441	BRN_WT_1211	-	Prox1	UTR3
chr1	190118555	190118675	BRN_WT_1212	-	Prox1	UTR3
chr1	190343605	190343622	BRN_WT_1213	+	Intergenic	Intergenic
chr1	190397270	190397284	BRN_WT_1214	-	Intergenic	Intergenic
chr1	190483056	190483111	BRN_WT_1215	-	Gm23153	Noncoding_exon
chr1	190690642	190690659	BRN_WT_1216	+	Intergenic	Intergenic
chr1	191050668	191050732	BRN_WT_1217	-	Tatdn3	Coding_intron
chr1	191051667	191051764	BRN_WT_1218	-	Tatdn3	Coding_intron
chr1	191051988	191052090	BRN_WT_1219	-	Tatdn3	Coding_intron
chr1	191121078	191121176	BRN_WT_1220	+	Intergenic	Intergenic
chr1	191224342	191224355	BRN_WT_1221	-	Intergenic	Intergenic
chr1	191224691	191224707	BRN_WT_1222	-	Intergenic	Intergenic
chr1	191263221	191263238	BRN_WT_1223	-	Intergenic	Intergenic
chr1	191388751	191388795	BRN_WT_1224	+	Intergenic	Intergenic
chr1	191389389	191389431	BRN_WT_1225	+	Intergenic	Intergenic
chr1	191396135	191396152	BRN_WT_1226	-	Ppp2r5a	Coding_intron
chr1	191779973	191780051	BRN_WT_1227	+	Lpgat1	UTR3
chr1	191780924	191780980	BRN_WT_1228	+	Lpgat1	UTR3
chr1	191783338	191783467	BRN_WT_1229	+	Lpgat1	UTR3
chr1	192138071	192138093	BRN_WT_1230	-	Intergenic	Intergenic
chr1	192317777	192317864	BRN_WT_1231	+	Kcnh1	Coding_intron
chr1	192454037	192454094	BRN_WT_1232	-	Intergenic	Intergenic
chr1	192666098	192666216	BRN_WT_1233	-	Hhat	Coding_intron
chr1	192792981	192792996	BRN_WT_1234	-	Intergenic	Intergenic
chr1	192805852	192805868	BRN_WT_1235	+	Intergenic	Intergenic
chr1	192995800	192995812	BRN_WT_1236	+	Intergenic	Intergenic
chr1	193137434	193137469	BRN_WT_1237	-	Intergenic	Intergenic
chr1	193227818	193227932	BRN_WT_1238	+	Lamb3	Coding_intron
chr1	194812467	194812575	BRN_WT_1239	+	Plxna2	UTR3
chr1	194816759	194816844	BRN_WT_1240	+	Plxna2	UTR3
chr1	195017018	195017200	BRN_WT_1241	+	A330023F24Rik	Noncoding_intron
chr1	195037089	195037114	BRN_WT_1242	+	Mir29b-2	Noncoding_exon
chr1	195129780	195129794	BRN_WT_1243	-	Cr1l	Coding_intron
chr1	195279221	195279281	BRN_WT_1244	-	Intergenic	Intergenic
chr1	195371656	195371702	BRN_WT_1245	+	Intergenic	Intergenic
chr1	195371729	195371833	BRN_WT_1246	+	Intergenic	Intergenic
chr10	3967020	3967118	BRN_WT_1247	+	Plekhg1	UTR3
chr10	3967181	3967253	BRN_WT_1248	+	Plekhg1	UTR3
chr10	4034973	4034991	BRN_WT_1249	-	Intergenic	Intergenic
chr10	4358815	4358851	BRN_WT_1250	+	Akap12	UTR3
chr10	4386564	4386580	BRN_WT_1251	-	Zbtb2	Coding_intron
chr10	4484255	4484294	BRN_WT_1252	+	Ccdc170	Coding_intron
chr10	4614420	4614464	BRN_WT_1253	+	Esr1	Coding_intron
chr10	5099473	5099594	BRN_WT_1254	-	Intergenic	Intergenic
chr10	5162333	5162428	BRN_WT_1255	-	Intergenic	Intergenic
chr10	5172980	5173044	BRN_WT_1256	-	Intergenic	Intergenic
chr10	5185460	5185527	BRN_WT_1257	-	Intergenic	Intergenic
chr10	5206878	5206894	BRN_WT_1258	-	Intergenic	Intergenic
chr10	5215202	5215344	BRN_WT_1259	-	Intergenic	Intergenic
chr10	5217580	5217694	BRN_WT_1260	-	Intergenic	Intergenic
chr10	5218527	5218587	BRN_WT_1261	-	Intergenic	Intergenic
chr10	5228080	5228192	BRN_WT_1262	-	Intergenic	Intergenic
chr10	5228383	5228502	BRN_WT_1263	-	Intergenic	Intergenic
chr10	5228569	5228671	BRN_WT_1264	-	Intergenic	Intergenic
chr10	5229281	5229333	BRN_WT_1265	-	Intergenic	Intergenic
chr10	5231575	5231628	BRN_WT_1266	-	Intergenic	Intergenic
chr10	5234580	5234656	BRN_WT_1267	-	Intergenic	Intergenic
chr10	5249635	5249717	BRN_WT_1268	-	Intergenic	Intergenic
chr10	5298949	5299043	BRN_WT_1269	-	Intergenic	Intergenic
chr10	5322580	5322652	BRN_WT_1270	-	Intergenic	Intergenic
chr10	5323924	5324041	BRN_WT_1271	-	Intergenic	Intergenic
chr10	5330196	5330290	BRN_WT_1272	-	Intergenic	Intergenic
chr10	5339304	5339379	BRN_WT_1273	-	Syne1	Coding_cdsexon
chr10	5348928	5349004	BRN_WT_1274	-	Syne1	Coding_cdsexon
chr10	5368202	5368268	BRN_WT_1275	-	Syne1	Coding_cdsexon
chr10	5825854	5825882	BRN_WT_1276	-	Rgs17	UTR3
chr10	5826333	5826409	BRN_WT_1277	-	Rgs17	UTR3
chr10	5830504	5830571	BRN_WT_1278	-	Rgs17	UTR3
chr10	5830758	5830882	BRN_WT_1279	-	Rgs17	UTR3
chr10	6039683	6039700	BRN_WT_1280	-	Intergenic	Intergenic
chr10	6064511	6064524	BRN_WT_1281	-	Intergenic	Intergenic
chr10	6662887	6662904	BRN_WT_1282	-	Intergenic	Intergenic
chr10	6853087	6853123	BRN_WT_1283	+	Oprm1	Coding_intron
chr10	6858670	6858759	BRN_WT_1284	+	Oprm1	Coding_intron
chr10	6859328	6859390	BRN_WT_1285	+	Oprm1	Coding_intron
chr10	6859634	6859680	BRN_WT_1286	+	Oprm1	Coding_intron
chr10	6859685	6859752	BRN_WT_1287	+	Oprm1	Coding_intron
chr10	6859943	6860008	BRN_WT_1288	+	Oprm1	Coding_intron
chr10	6885818	6886133	BRN_WT_1289	-	Ipcef1	UTR3
chr10	6889104	6889210	BRN_WT_1290	-	Ipcef1	UTR3
chr10	6889276	6889490	BRN_WT_1291	-	Ipcef1	UTR3
chr10	6889619	6889668	BRN_WT_1292	-	Ipcef1	UTR3
chr10	6976816	6976902	BRN_WT_1293	-	Ipcef1	Coding_intron
chr10	7119348	7119430	BRN_WT_1294	-	Cnksr3	UTR3
chr10	7237475	7237509	BRN_WT_1295	+	Intergenic	Intergenic
chr10	7328184	7328197	BRN_WT_1296	+	Intergenic	Intergenic
chr10	7629738	7629775	BRN_WT_1297	-	Pcmt1	UTR3
chr10	7630413	7630499	BRN_WT_1298	-	Pcmt1	UTR3
chr10	7645612	7645765	BRN_WT_1299	-	Pcmt1	Coding_intron
chr10	7713292	7713331	BRN_WT_1300	+	Lats1	UTR3
chr10	7713717	7713815	BRN_WT_1301	+	Lats1	UTR3
chr10	7714448	7714583	BRN_WT_1302	+	Lats1	UTR3
chr10	7714592	7714721	BRN_WT_1303	+	Lats1	UTR3
chr10	7714727	7714777	BRN_WT_1304	+	Lats1	UTR3
chr10	7715767	7715883	BRN_WT_1305	+	Lats1	UTR3
chr10	7715995	7716088	BRN_WT_1306	+	Lats1	UTR3
chr10	7716137	7716172	BRN_WT_1307	+	Lats1	UTR3
chr10	7716226	7716280	BRN_WT_1308	+	Lats1	UTR3
chr10	7821683	7821795	BRN_WT_1309	+	Ppil4	UTR3
chr10	7821874	7821947	BRN_WT_1310	+	Ppil4	UTR3
chr10	7905539	7905562	BRN_WT_1311	+	Intergenic	Intergenic
chr10	7906099	7906160	BRN_WT_1312	-	Tab2	UTR3
chr10	8722241	8722266	BRN_WT_1313	-	Sash1	UTR3
chr10	8722379	8722444	BRN_WT_1314	-	Sash1	UTR3
chr10	8724846	8724962	BRN_WT_1315	-	Sash1	UTR3
chr10	8724969	8725013	BRN_WT_1316	-	Sash1	UTR3
chr10	8829842	8829888	BRN_WT_1317	-	Sash1	Coding_intron
chr10	9116921	9116995	BRN_WT_1318	-	Intergenic	Intergenic
chr10	9609889	9610036	BRN_WT_1319	-	Intergenic	Intergenic
chr10	9653247	9653262	BRN_WT_1320	+	Intergenic	Intergenic
chr10	9747571	9747637	BRN_WT_1321	+	Intergenic	Intergenic
chr10	9756024	9756169	BRN_WT_1322	-	Stxbp5	UTR3
chr10	9756257	9756313	BRN_WT_1323	-	Stxbp5	UTR3
chr10	9828196	9828266	BRN_WT_1324	-	Stxbp5	Coding_intron
chr10	9828375	9828437	BRN_WT_1325	-	Stxbp5	Coding_intron
chr10	9901182	9901194	BRN_WT_1326	+	Intergenic	Intergenic
chr10	9968383	9968426	BRN_WT_1327	-	Intergenic	Intergenic
chr10	10100980	10101000	BRN_WT_1328	+	Gm25682	Noncoding_exon
chr10	10423176	10423192	BRN_WT_1329	+	Intergenic	Intergenic
chr10	10874358	10874539	BRN_WT_1330	-	Grm1	Coding_intron
chr10	10880431	10880614	BRN_WT_1331	-	Grm1	Coding_intron
chr10	10932750	10932982	BRN_WT_1332	-	Grm1	Coding_intron
chr10	11213804	11214243	BRN_WT_1333	+	Shprh	UTR3
chr10	11214246	11214362	BRN_WT_1334	+	Shprh	UTR3
chr10	11214568	11214606	BRN_WT_1335	+	Shprh	UTR3
chr10	11214698	11214755	BRN_WT_1336	+	Shprh	UTR3
chr10	11215123	11215194	BRN_WT_1337	+	Shprh	UTR3
chr10	11533106	11533126	BRN_WT_1338	+	Intergenic	Intergenic
chr10	12058517	12058534	BRN_WT_1339	+	Intergenic	Intergenic
chr10	12060326	12060358	BRN_WT_1340	-	Intergenic	Intergenic
chr10	12382664	12382732	BRN_WT_1341	-	Utrn	UTR3
chr10	12383722	12383788	BRN_WT_1342	-	Utrn	UTR3
chr10	12383832	12383995	BRN_WT_1343	-	Utrn	UTR3
chr10	12629263	12629276	BRN_WT_1344	-	Utrn	Coding_intron
chr10	12630436	12630455	BRN_WT_1345	+	Intergenic	Intergenic
chr10	12793924	12793974	BRN_WT_1346	-	Utrn	Coding_intron
chr10	12922569	12922603	BRN_WT_1347	-	B230208H11Rik	Noncoding_exon
chr10	13112001	13112018	BRN_WT_1348	-	Intergenic	Intergenic
chr10	13129452	13129537	BRN_WT_1349	+	Plagl1	UTR3
chr10	13129730	13129773	BRN_WT_1350	+	Plagl1	UTR3
chr10	13200392	13200409	BRN_WT_1351	-	Intergenic	Intergenic
chr10	13402097	13402164	BRN_WT_1352	+	Intergenic	Intergenic
chr10	13402180	13402200	BRN_WT_1353	+	Intergenic	Intergenic
chr10	14034062	14034076	BRN_WT_1354	+	Hivep2	Coding_intron
chr10	14127866	14127938	BRN_WT_1355	+	Hivep2	Coding_cdsexon
chr10	14128922	14129021	BRN_WT_1356	+	Hivep2	Coding_cdsexon
chr10	14149738	14150731	BRN_WT_1357	+	Hivep2	UTR3
chr10	14150889	14150968	BRN_WT_1358	+	Hivep2	UTR3
chr10	14151126	14151147	BRN_WT_1359	+	Hivep2	UTR3
chr10	14151241	14151353	BRN_WT_1360	+	Hivep2	UTR3
chr10	14679126	14679142	BRN_WT_1361	-	Vta1	Coding_intron
chr10	14974406	14974474	BRN_WT_1362	+	Intergenic	Intergenic
chr10	15251532	15251638	BRN_WT_1363	-	Intergenic	Intergenic
chr10	15648656	15648669	BRN_WT_1364	-	Intergenic	Intergenic
chr10	16053686	16053823	BRN_WT_1365	+	Intergenic	Intergenic
chr10	17421702	17421721	BRN_WT_1366	-	Intergenic	Intergenic
chr10	17600967	17600979	BRN_WT_1367	-	Intergenic	Intergenic
chr10	17899146	17899179	BRN_WT_1368	-	Intergenic	Intergenic
chr10	18096596	18096677	BRN_WT_1369	+	Reps1	Coding_intron
chr10	18533223	18533259	BRN_WT_1370	+	Nhsl1	UTR3
chr10	18581923	18581980	BRN_WT_1371	-	Intergenic	Intergenic
chr10	18587464	18587514	BRN_WT_1372	-	Intergenic	Intergenic
chr10	18703090	18703115	BRN_WT_1373	-	Arfgef3	Coding_intron
chr10	19156849	19156868	BRN_WT_1374	-	Intergenic	Intergenic
chr10	19388908	19388925	BRN_WT_1375	-	Intergenic	Intergenic
chr10	19686460	19686474	BRN_WT_1376	+	Intergenic	Intergenic
chr10	19782853	19782960	BRN_WT_1377	+	Gm25256	Noncoding_exon
chr10	20256324	20256341	BRN_WT_1378	+	Map7	Coding_intron
chr10	20281172	20281230	BRN_WT_1379	+	Map7	UTR3
chr10	20340949	20341038	BRN_WT_1380	+	Bclaf1	UTR3
chr10	20341077	20341120	BRN_WT_1381	+	Bclaf1	UTR3
chr10	20342444	20342479	BRN_WT_1382	+	Bclaf1	UTR3
chr10	20397106	20397180	BRN_WT_1383	-	Intergenic	Intergenic
chr10	20397507	20397645	BRN_WT_1384	-	Intergenic	Intergenic
chr10	20397756	20397795	BRN_WT_1385	-	Intergenic	Intergenic
chr10	20397932	20397974	BRN_WT_1386	-	Intergenic	Intergenic
chr10	20398028	20398061	BRN_WT_1387	-	Pde7b	UTR3
chr10	20398713	20398748	BRN_WT_1388	-	Pde7b	UTR3
chr10	20398787	20398848	BRN_WT_1389	-	Pde7b	UTR3
chr10	20399202	20399280	BRN_WT_1390	-	Pde7b	UTR3
chr10	20399399	20399610	BRN_WT_1391	-	Pde7b	UTR3
chr10	20399617	20399796	BRN_WT_1392	-	Pde7b	UTR3
chr10	20459774	20459897	BRN_WT_1393	-	Pde7b	Coding_intron
chr10	21079829	21079881	BRN_WT_1394	+	Ahi1	UTR3
chr10	21169749	21169764	BRN_WT_1395	-	Intergenic	Intergenic
chr10	21957543	21957556	BRN_WT_1396	+	Sgk1	Coding_intron
chr10	22110889	22110902	BRN_WT_1397	+	Gm19791	Noncoding_exon
chr10	22138820	22138850	BRN_WT_1398	+	Intergenic	Intergenic
chr10	22281200	22281233	BRN_WT_1399	-	Gm26740	Noncoding_intron
chr10	22281367	22281421	BRN_WT_1400	-	Gm26740	Noncoding_intron
chr10	22607469	22607484	BRN_WT_1401	-	Intergenic	Intergenic
chr10	22704261	22704287	BRN_WT_1402	-	Tbpl1	UTR3
chr10	22704971	22705301	BRN_WT_1403	-	Tbpl1	UTR3
chr10	22705434	22705505	BRN_WT_1404	-	Tbpl1	UTR3
chr10	22705550	22705585	BRN_WT_1405	-	Tbpl1	UTR3
chr10	22943549	22943564	BRN_WT_1406	+	Intergenic	Intergenic
chr10	23353577	23353597	BRN_WT_1407	+	Intergenic	Intergenic
chr10	23666339	23666357	BRN_WT_1408	+	Intergenic	Intergenic
chr10	23786472	23786531	BRN_WT_1409	-	Rps12	Coding_intron
chr10	23800802	23800847	BRN_WT_1410	+	Slc18b1	Coding_intron
chr10	24188005	24188112	BRN_WT_1411	+	Stx7	UTR3
chr10	24188131	24188190	BRN_WT_1412	+	Stx7	UTR3
chr10	24188191	24188420	BRN_WT_1413	+	Stx7	UTR3
chr10	24468195	24468211	BRN_WT_1414	-	Intergenic	Intergenic
chr10	24598247	24598342	BRN_WT_1415	+	Ctgf	UTR3
chr10	24598586	24598643	BRN_WT_1416	+	Ctgf	UTR3
chr10	24824530	24824576	BRN_WT_1417	-	Enpp3	Coding_intron
chr10	24924004	24924033	BRN_WT_1418	-	Arg1	Coding_intron
chr10	25169839	25169891	BRN_WT_1419	-	Akap7	UTR3
chr10	25412855	25412872	BRN_WT_1420	+	Epb41l2	Coding_intron
chr10	26040844	26040918	BRN_WT_1421	-	Tmem200a	Coding_intron
chr10	26275443	26275485	BRN_WT_1422	-	L3mbtl3	UTR3
chr10	26275793	26275844	BRN_WT_1423	-	L3mbtl3	UTR3
chr10	26336804	26336820	BRN_WT_1424	-	L3mbtl3	Coding_intron
chr10	27521126	27521141	BRN_WT_1425	+	Intergenic	Intergenic
chr10	28565665	28565736	BRN_WT_1426	+	Ptprk	Coding_intron
chr10	28596624	28596648	BRN_WT_1427	+	Ptprk	UTR3
chr10	28844160	28844176	BRN_WT_1428	-	Intergenic	Intergenic
chr10	29199050	29199147	BRN_WT_1429	+	Soga3	UTR3
chr10	29199180	29199255	BRN_WT_1430	+	Soga3	UTR3
chr10	29200929	29201058	BRN_WT_1431	+	Intergenic	Intergenic
chr10	29223427	29223451	BRN_WT_1432	+	9330159F19Rik	Coding_intron
chr10	29227592	29227839	BRN_WT_1433	+	9330159F19Rik	UTR3
chr10	29345179	29345261	BRN_WT_1434	+	Echdc1	UTR3
chr10	29346515	29346545	BRN_WT_1435	-	Rnf146	UTR3
chr10	29397166	29397189	BRN_WT_1436	+	Intergenic	Intergenic
chr10	29856441	29856453	BRN_WT_1437	+	Intergenic	Intergenic
chr10	29970973	29971017	BRN_WT_1438	+	Intergenic	Intergenic
chr10	30373356	30373375	BRN_WT_1439	-	Intergenic	Intergenic
chr10	30493953	30494048	BRN_WT_1440	+	Gm22623	Noncoding_exon
chr10	30534857	30534926	BRN_WT_1441	-	Trmt11	UTR3
chr10	30604642	30604691	BRN_WT_1442	-	Intergenic	Intergenic
chr10	30604767	30604801	BRN_WT_1443	-	Intergenic	Intergenic
chr10	30605069	30605200	BRN_WT_1444	-	Intergenic	Intergenic
chr10	30605432	30605495	BRN_WT_1445	-	Intergenic	Intergenic
chr10	30679011	30679048	BRN_WT_1446	-	Ncoa7	Coding_intron
chr10	30689683	30689696	BRN_WT_1447	+	Intergenic	Intergenic
chr10	30873269	30873281	BRN_WT_1448	-	Intergenic	Intergenic
chr10	30939251	30939270	BRN_WT_1449	-	Intergenic	Intergenic
chr10	30942375	30942426	BRN_WT_1450	-	Gm24168	Noncoding_exon
chr10	31347223	31347238	BRN_WT_1451	-	Tpd52l1	Coding_intron
chr10	31536060	31536076	BRN_WT_1452	-	Rnf217	Coding_intron
chr10	31736871	31736883	BRN_WT_1453	+	Intergenic	Intergenic
chr10	31887046	31887159	BRN_WT_1454	-	Nkain2	Coding_intron
chr10	32157628	32157643	BRN_WT_1455	+	Intergenic	Intergenic
chr10	32192662	32192716	BRN_WT_1456	-	Nkain2	Coding_intron
chr10	32203552	32203769	BRN_WT_1457	-	Nkain2	Coding_intron
chr10	32240457	32240539	BRN_WT_1458	-	Nkain2	Coding_intron
chr10	32521454	32521468	BRN_WT_1459	-	Nkain2	Coding_intron
chr10	32859591	32859711	BRN_WT_1460	-	Nkain2	Coding_intron
chr10	33509399	33509413	BRN_WT_1461	-	Intergenic	Intergenic
chr10	34015666	34015784	BRN_WT_1462	-	Rwdd1	Coding_intron
chr10	34075463	34075489	BRN_WT_1463	-	Intergenic	Intergenic
chr10	34298808	34299094	BRN_WT_1464	+	Tspyl4	UTR3
chr10	34300954	34301005	BRN_WT_1465	+	Tspyl4	UTR3
chr10	34454249	34454262	BRN_WT_1466	+	Intergenic	Intergenic
chr10	35709902	35709954	BRN_WT_1467	-	Amd2	UTR3
chr10	35768996	35769020	BRN_WT_1468	-	Intergenic	Intergenic
chr10	37133300	37133451	BRN_WT_1469	-	Intergenic	Intergenic
chr10	37133452	37133509	BRN_WT_1470	-	Marcks	UTR3
chr10	37133558	37133655	BRN_WT_1471	-	Marcks	UTR3
chr10	37134024	37134064	BRN_WT_1472	-	Marcks	UTR3
chr10	37134155	37134281	BRN_WT_1473	-	Marcks	UTR3
chr10	37134458	37134513	BRN_WT_1474	-	Marcks	UTR3
chr10	37134561	37134863	BRN_WT_1475	-	Marcks	UTR3
chr10	37134892	37134997	BRN_WT_1476	-	Marcks	UTR3
chr10	37135026	37135441	BRN_WT_1477	-	Marcks	UTR3
chr10	37135642	37135698	BRN_WT_1478	-	Marcks	UTR3
chr10	37791264	37791337	BRN_WT_1479	-	Intergenic	Intergenic
chr10	37820518	37820538	BRN_WT_1480	+	Intergenic	Intergenic
chr10	38013909	38013923	BRN_WT_1481	-	Intergenic	Intergenic
chr10	38399129	38399141	BRN_WT_1482	+	Intergenic	Intergenic
chr10	38689784	38689850	BRN_WT_1483	+	Intergenic	Intergenic
chr10	39030542	39030556	BRN_WT_1484	-	Intergenic	Intergenic
chr10	39369808	39369821	BRN_WT_1485	+	Fyn	UTR5
chr10	39385558	39385571	BRN_WT_1486	+	Fyn	Coding_intron
chr10	39385650	39385663	BRN_WT_1487	+	Fyn	Coding_intron
chr10	39564238	39564263	BRN_WT_1488	+	Fyn	UTR3
chr10	39564492	39564526	BRN_WT_1489	+	Fyn	UTR3
chr10	39874956	39874998	BRN_WT_1490	+	Rev3l	UTR3
chr10	39875001	39875132	BRN_WT_1491	+	Rev3l	UTR3
chr10	40288682	40288746	BRN_WT_1492	-	Amd1	UTR3
chr10	40322133	40322150	BRN_WT_1493	-	Intergenic	Intergenic
chr10	40383477	40383490	BRN_WT_1494	-	Intergenic	Intergenic
chr10	40454373	40454389	BRN_WT_1495	-	Intergenic	Intergenic
chr10	40480097	40480221	BRN_WT_1496	+	Cdk19	UTR3
chr10	40480795	40480856	BRN_WT_1497	+	Cdk19	UTR3
chr10	40480860	40481023	BRN_WT_1498	+	Cdk19	UTR3
chr10	40483532	40483662	BRN_WT_1499	+	Cdk19	UTR3
chr10	40646918	40646974	BRN_WT_1500	+	Ddo	Coding_intron
chr10	40938155	40938200	BRN_WT_1501	+	Wasf1	UTR3
chr10	40938388	40938417	BRN_WT_1502	+	Wasf1	UTR3
chr10	41529381	41529493	BRN_WT_1503	+	Cd164	UTR3
chr10	41529721	41529768	BRN_WT_1504	+	Cd164	UTR3
chr10	41529859	41529932	BRN_WT_1505	+	Cd164	UTR3
chr10	41530350	41530397	BRN_WT_1506	+	Cd164	UTR3
chr10	42070053	42070065	BRN_WT_1507	-	Intergenic	Intergenic
chr10	42184353	42184407	BRN_WT_1508	-	Foxo3	UTR3
chr10	42184520	42184533	BRN_WT_1509	+	Intergenic	Intergenic
chr10	42184656	42184855	BRN_WT_1510	-	Foxo3	UTR3
chr10	42184954	42185047	BRN_WT_1511	-	Foxo3	UTR3
chr10	42185135	42185234	BRN_WT_1512	-	Foxo3	UTR3
chr10	42186030	42186106	BRN_WT_1513	-	Foxo3	UTR3
chr10	42267182	42267228	BRN_WT_1514	-	Foxo3	Coding_intron
chr10	42289818	42289833	BRN_WT_1515	-	Intergenic	Intergenic
chr10	42644161	42644174	BRN_WT_1516	-	Intergenic	Intergenic
chr10	42700780	42700833	BRN_WT_1517	+	Ostm1	UTR3
chr10	42700983	42701196	BRN_WT_1518	+	Ostm1	UTR3
chr10	42702320	42702420	BRN_WT_1519	+	Ostm1	UTR3
chr10	42768198	42768274	BRN_WT_1520	+	Sec63	Coding_intron
chr10	42831918	42831952	BRN_WT_1521	+	Sec63	UTR3
chr10	42832244	42832310	BRN_WT_1522	+	Sec63	UTR3
chr10	42856751	42856787	BRN_WT_1523	-	Intergenic	Intergenic
chr10	42962666	42962683	BRN_WT_1524	-	Intergenic	Intergenic
chr10	43008746	43008835	BRN_WT_1525	-	Sobp	Coding_intron
chr10	43769030	43769048	BRN_WT_1526	+	Intergenic	Intergenic
chr10	44346996	44347010	BRN_WT_1527	-	Intergenic	Intergenic
chr10	44505241	44505255	BRN_WT_1528	+	Intergenic	Intergenic
chr10	44633557	44633619	BRN_WT_1529	+	Intergenic	Intergenic
chr10	45453984	45454002	BRN_WT_1530	+	Intergenic	Intergenic
chr10	45499622	45499649	BRN_WT_1531	-	Intergenic	Intergenic
chr10	45711985	45712068	BRN_WT_1532	+	Hace1	UTR3
chr10	45712071	45712107	BRN_WT_1533	+	Hace1	UTR3
chr10	45806941	45806954	BRN_WT_1534	+	Intergenic	Intergenic
chr10	46626181	46626194	BRN_WT_1535	+	Intergenic	Intergenic
chr10	46745018	46745037	BRN_WT_1536	-	Intergenic	Intergenic
chr10	46768864	46768929	BRN_WT_1537	-	Intergenic	Intergenic
chr10	47425637	47425678	BRN_WT_1538	+	Intergenic	Intergenic
chr10	47970853	47970870	BRN_WT_1539	-	Intergenic	Intergenic
chr10	48267266	48267279	BRN_WT_1540	+	Intergenic	Intergenic
chr10	48298205	48298222	BRN_WT_1541	+	Intergenic	Intergenic
chr10	49113018	49113102	BRN_WT_1542	-	Grik2	Coding_intron
chr10	49707580	49707643	BRN_WT_1543	-	Grik2	Coding_intron
chr10	51521716	51521740	BRN_WT_1544	-	Intergenic	Intergenic
chr10	52083506	52083518	BRN_WT_1545	-	Ros1	Coding_intron
chr10	52095586	52095599	BRN_WT_1546	-	Ros1	Coding_intron
chr10	52144471	52144533	BRN_WT_1547	-	Ros1	Coding_intron
chr10	52337088	52337201	BRN_WT_1548	-	Gopc	UTR3
chr10	52338046	52338093	BRN_WT_1549	-	Gopc	UTR3
chr10	52338097	52338470	BRN_WT_1550	-	Gopc	UTR3
chr10	52339514	52339571	BRN_WT_1551	-	Gopc	UTR3
chr10	52417637	52417675	BRN_WT_1552	+	Nus1	UTR5
chr10	52417644	52417656	BRN_WT_1553	-	Intergenic	Intergenic
chr10	52436815	52436907	BRN_WT_1554	+	Nus1	UTR3
chr10	52437046	52437107	BRN_WT_1555	+	Nus1	UTR3
chr10	52437304	52437347	BRN_WT_1556	+	Nus1	UTR3
chr10	52438069	52438120	BRN_WT_1557	+	Nus1	UTR3
chr10	52439019	52439142	BRN_WT_1558	+	Nus1	UTR3
chr10	53108818	53108865	BRN_WT_1559	+	Slc35f1	UTR3
chr10	53273473	53273599	BRN_WT_1560	-	Intergenic	Intergenic
chr10	53273713	53273777	BRN_WT_1561	-	Intergenic	Intergenic
chr10	53273808	53274046	BRN_WT_1562	-	Intergenic	Intergenic
chr10	53274986	53275040	BRN_WT_1563	-	Intergenic	Intergenic
chr10	53275261	53275342	BRN_WT_1564	-	Intergenic	Intergenic
chr10	53275537	53275601	BRN_WT_1565	-	Intergenic	Intergenic
chr10	53276800	53276848	BRN_WT_1566	-	Intergenic	Intergenic
chr10	53276931	53276980	BRN_WT_1567	-	Intergenic	Intergenic
chr10	53379420	53379436	BRN_WT_1568	+	Intergenic	Intergenic
chr10	53434753	53434777	BRN_WT_1569	-	Intergenic	Intergenic
chr10	53477928	53477941	BRN_WT_1570	-	Intergenic	Intergenic
chr10	53608144	53608231	BRN_WT_1571	+	Asf1a	UTR3
chr10	53609081	53609149	BRN_WT_1572	+	Asf1a	UTR3
chr10	53611722	53611768	BRN_WT_1573	+	Intergenic	Intergenic
chr10	53973120	53973138	BRN_WT_1574	-	Man1a	Coding_intron
chr10	54339953	54339969	BRN_WT_1575	+	Intergenic	Intergenic
chr10	55323439	55323452	BRN_WT_1576	-	Intergenic	Intergenic
chr10	55944434	55944450	BRN_WT_1577	-	Intergenic	Intergenic
chr10	56388750	56388831	BRN_WT_1578	+	Gja1	UTR3
chr10	56388836	56389017	BRN_WT_1579	+	Gja1	UTR3
chr10	56389039	56389111	BRN_WT_1580	+	Gja1	UTR3
chr10	56389853	56389987	BRN_WT_1581	+	Gja1	UTR3
chr10	56390093	56390156	BRN_WT_1582	+	Gja1	UTR3
chr10	57032197	57032259	BRN_WT_1583	+	Intergenic	Intergenic
chr10	57515777	57516214	BRN_WT_1584	-	Serinc1	UTR3
chr10	57516255	57516350	BRN_WT_1585	-	Serinc1	UTR3
chr10	57516360	57517144	BRN_WT_1586	-	Serinc1	UTR3
chr10	57517174	57517209	BRN_WT_1587	-	Serinc1	Coding_cdsexon
chr10	57519446	57519487	BRN_WT_1588	-	Serinc1	Coding_cdsexon
chr10	58304253	58304326	BRN_WT_1589	+	Gcc2	UTR3
chr10	58305189	58305244	BRN_WT_1590	+	Gcc2	UTR3
chr10	58305417	58305563	BRN_WT_1591	+	Gcc2	UTR3
chr10	58493975	58494227	BRN_WT_1592	+	Ranbp2	UTR3
chr10	58494415	58494492	BRN_WT_1593	+	Intergenic	Intergenic
chr10	58494616	58494660	BRN_WT_1594	+	Intergenic	Intergenic
chr10	58494686	58494729	BRN_WT_1595	+	Intergenic	Intergenic
chr10	58494839	58494888	BRN_WT_1596	+	Intergenic	Intergenic
chr10	58494966	58494989	BRN_WT_1597	+	Intergenic	Intergenic
chr10	58546671	58546703	BRN_WT_1598	+	Ccdc138	Coding_intron
chr10	59134992	59135079	BRN_WT_1599	+	Sh3rf3	Coding_intron
chr10	59427357	59427376	BRN_WT_1600	-	Oit3	Coding_intron
chr10	59447045	59447122	BRN_WT_1601	-	Mcu	UTR3
chr10	60107442	60107455	BRN_WT_1602	-	Intergenic	Intergenic
chr10	60762630	60762735	BRN_WT_1603	-	Unc5b	UTR3
chr10	60764684	60764756	BRN_WT_1604	-	Unc5b	UTR3
chr10	60831456	60831468	BRN_WT_1605	+	Intergenic	Intergenic
chr10	60943179	60943192	BRN_WT_1606	-	Intergenic	Intergenic
chr10	61176031	61176047	BRN_WT_1607	-	Intergenic	Intergenic
chr10	61191218	61191234	BRN_WT_1608	-	Intergenic	Intergenic
chr10	61757977	61757992	BRN_WT_1609	+	Intergenic	Intergenic
chr10	62045302	62045369	BRN_WT_1610	-	Intergenic	Intergenic
chr10	62197996	62198015	BRN_WT_1611	-	Tspan15	Coding_intron
chr10	62300736	62300750	BRN_WT_1612	+	Intergenic	Intergenic
chr10	62558729	62558814	BRN_WT_1613	-	Kif1bp	UTR3
chr10	62744329	62744382	BRN_WT_1614	-	Ccar1	UTR3
chr10	62744562	62744758	BRN_WT_1615	-	Ccar1	UTR3
chr10	62944509	62944575	BRN_WT_1616	+	Slc25a16	UTR3
chr10	62945931	62946008	BRN_WT_1617	+	Slc25a16	UTR3
chr10	62946177	62946215	BRN_WT_1618	+	Slc25a16	UTR3
chr10	62946261	62946386	BRN_WT_1619	+	Slc25a16	UTR3
chr10	63342001	63342016	BRN_WT_1620	-	Sirt1	Coding_intron
chr10	63749024	63749046	BRN_WT_1621	-	Intergenic	Intergenic
chr10	63858024	63858037	BRN_WT_1622	+	Ctnna3	Coding_intron
chr10	65541337	65541356	BRN_WT_1623	-	Intergenic	Intergenic
chr10	65614634	65614650	BRN_WT_1624	+	Intergenic	Intergenic
chr10	66236140	66236167	BRN_WT_1625	-	1700023F02Rik	Noncoding_intron
chr10	66495026	66495139	BRN_WT_1626	+	Intergenic	Intergenic
chr10	66626989	66627005	BRN_WT_1627	+	Intergenic	Intergenic
chr10	66829708	66829781	BRN_WT_1628	+	Intergenic	Intergenic
chr10	67010306	67010422	BRN_WT_1629	-	Reep3	UTR3
chr10	67010454	67010567	BRN_WT_1630	-	Reep3	UTR3
chr10	67012431	67012592	BRN_WT_1631	-	Reep3	UTR3
chr10	67226630	67226695	BRN_WT_1632	+	Jmjd1c	Coding_cdsexon
chr10	67255700	67255938	BRN_WT_1633	+	Jmjd1c	UTR3
chr10	67255964	67256314	BRN_WT_1634	+	Jmjd1c	UTR3
chr10	67605317	67605334	BRN_WT_1635	+	Intergenic	Intergenic
chr10	67886148	67886229	BRN_WT_1636	-	Zfp365	UTR3
chr10	67886261	67886315	BRN_WT_1637	-	Zfp365	UTR3
chr10	67886653	67887048	BRN_WT_1638	-	Zfp365	UTR3
chr10	67887191	67887546	BRN_WT_1639	-	Zfp365	UTR3
chr10	67887621	67887713	BRN_WT_1640	-	Zfp365	UTR3
chr10	67888392	67888482	BRN_WT_1641	-	Zfp365	UTR3
chr10	67912556	67912587	BRN_WT_1642	-	Zfp365	UTR5
chr10	68059985	68059998	BRN_WT_1643	+	Intergenic	Intergenic
chr10	68092571	68092695	BRN_WT_1644	-	Intergenic	Intergenic
chr10	68092740	68092897	BRN_WT_1645	-	Intergenic	Intergenic
chr10	68094382	68094429	BRN_WT_1646	-	Intergenic	Intergenic
chr10	68095688	68095862	BRN_WT_1647	-	Arid5b	UTR3
chr10	68095909	68096033	BRN_WT_1648	-	Arid5b	UTR3
chr10	68784397	68784412	BRN_WT_1649	+	Intergenic	Intergenic
chr10	69427488	69427501	BRN_WT_1650	-	Intergenic	Intergenic
chr10	69556454	69556470	BRN_WT_1651	+	Ank3	Coding_intron
chr10	69656777	69656857	BRN_WT_1652	+	Ank3	Coding_intron
chr10	69672431	69672517	BRN_WT_1653	+	Ank3	Coding_intron
chr10	69672521	69672591	BRN_WT_1654	+	Ank3	Coding_intron
chr10	69725249	69725265	BRN_WT_1655	+	Ank3	Coding_intron
chr10	69735125	69735257	BRN_WT_1656	+	Ank3	Coding_intron
chr10	69755045	69755099	BRN_WT_1657	+	Ank3	Coding_intron
chr10	69774305	69774344	BRN_WT_1658	+	Ank3	Coding_intron
chr10	69956296	69956309	BRN_WT_1659	+	Ank3	Coding_intron
chr10	70003904	70003921	BRN_WT_1660	+	Ank3	Coding_intron
chr10	70024015	70024128	BRN_WT_1661	+	Ank3	UTR3
chr10	70024241	70024267	BRN_WT_1662	+	Ank3	UTR3
chr10	70024352	70024491	BRN_WT_1663	+	Ank3	UTR3
chr10	70024517	70024635	BRN_WT_1664	+	Ank3	UTR3
chr10	70024728	70024812	BRN_WT_1665	+	Ank3	UTR3
chr10	70024814	70025007	BRN_WT_1666	+	Ank3	UTR3
chr10	70025168	70025248	BRN_WT_1667	+	Ank3	UTR3
chr10	70025687	70025753	BRN_WT_1668	+	Ank3	UTR3
chr10	70026900	70026972	BRN_WT_1669	+	Ank3	UTR3
chr10	70210377	70210406	BRN_WT_1670	+	Mrln	Noncoding_intron
chr10	70558037	70558176	BRN_WT_1671	+	Fam13c	UTR3
chr10	70558624	70558710	BRN_WT_1672	-	Phyhipl	UTR3
chr10	70558631	70558734	BRN_WT_1673	+	Fam13c	UTR3
chr10	70558723	70558862	BRN_WT_1674	-	Phyhipl	UTR3
chr10	70558887	70558954	BRN_WT_1675	-	Phyhipl	UTR3
chr10	70702537	70702646	BRN_WT_1676	-	Intergenic	Intergenic
chr10	70882103	70882210	BRN_WT_1677	+	4930533K18Rik	Coding_intron
chr10	70908704	70908719	BRN_WT_1678	+	4930533K18Rik	Coding_intron
chr10	71228039	71228091	BRN_WT_1679	-	Tfam	UTR3
chr10	71339456	71339469	BRN_WT_1680	+	Intergenic	Intergenic
chr10	71706668	71706714	BRN_WT_1681	+	Intergenic	Intergenic
chr10	71706736	71706827	BRN_WT_1682	+	Intergenic	Intergenic
chr10	71706828	71706863	BRN_WT_1683	+	Intergenic	Intergenic
chr10	71707500	71707607	BRN_WT_1684	+	Intergenic	Intergenic
chr10	72293368	72293413	BRN_WT_1685	+	Intergenic	Intergenic
chr10	72633523	72633540	BRN_WT_1686	+	Intergenic	Intergenic
chr10	72674138	72674333	BRN_WT_1687	+	Zwint	UTR3
chr10	72674340	72674442	BRN_WT_1688	+	Zwint	UTR3
chr10	72674646	72674707	BRN_WT_1689	+	Zwint	UTR3
chr10	72674814	72674887	BRN_WT_1690	+	Zwint	UTR3
chr10	72674893	72674964	BRN_WT_1691	+	Zwint	UTR3
chr10	72771157	72771173	BRN_WT_1692	-	Intergenic	Intergenic
chr10	73110136	73110151	BRN_WT_1693	+	Pcdh15	Noncoding_intron
chr10	73152715	73152946	BRN_WT_1694	+	Pcdh15	Noncoding_intron
chr10	73202767	73202841	BRN_WT_1695	+	Pcdh15	Noncoding_intron
chr10	73203045	73203110	BRN_WT_1696	+	Pcdh15	Noncoding_intron
chr10	73203213	73203266	BRN_WT_1697	+	Pcdh15	Noncoding_intron
chr10	73243254	73243298	BRN_WT_1698	+	Pcdh15	Noncoding_intron
chr10	74994959	74994974	BRN_WT_1699	-	Rsph14	Coding_intron
chr10	75016302	75016427	BRN_WT_1700	+	Gnaz	UTR3
chr10	75061296	75061313	BRN_WT_1701	+	Bcr	Coding_cdsexon
chr10	75131366	75131419	BRN_WT_1702	+	Bcr	Coding_intron
chr10	75971224	75971242	BRN_WT_1703	+	Gm5134	Coding_intron
chr10	76241314	76241329	BRN_WT_1704	-	Intergenic	Intergenic
chr10	76310729	76310804	BRN_WT_1705	-	Dip2a	Coding_intron
chr10	76311294	76311321	BRN_WT_1706	-	Dip2a	Coding_intron
chr10	76311850	76311929	BRN_WT_1707	-	Dip2a	Coding_intron
chr10	76312229	76312306	BRN_WT_1708	-	Dip2a	Coding_intron
chr10	76329918	76329936	BRN_WT_1709	+	Intergenic	Intergenic
chr10	76634755	76634768	BRN_WT_1710	+	Intergenic	Intergenic
chr10	76729254	76729270	BRN_WT_1711	-	Intergenic	Intergenic
chr10	76777671	76777686	BRN_WT_1712	-	Pcbp3	Coding_intron
chr10	76962112	76962127	BRN_WT_1713	+	Intergenic	Intergenic
chr10	77272903	77272922	BRN_WT_1714	+	Intergenic	Intergenic
chr10	77290771	77290877	BRN_WT_1715	-	Adarb1	UTR3
chr10	77293120	77293150	BRN_WT_1716	-	Adarb1	UTR3
chr10	77294137	77294161	BRN_WT_1717	-	Adarb1	UTR3
chr10	77522606	77522621	BRN_WT_1718	-	Intergenic	Intergenic
chr10	77598091	77598162	BRN_WT_1719	+	Pttg1ip	UTR3
chr10	77662276	77662290	BRN_WT_1720	-	Intergenic	Intergenic
chr10	78186683	78186914	BRN_WT_1721	-	Trappc10	UTR3
chr10	78187609	78187644	BRN_WT_1722	-	Trappc10	UTR3
chr10	78284013	78284027	BRN_WT_1723	+	Intergenic	Intergenic
chr10	78392334	78392348	BRN_WT_1724	+	Intergenic	Intergenic
chr10	78426102	78426118	BRN_WT_1725	+	Cstb	Coding_intron
chr10	78519605	78519623	BRN_WT_1726	-	Intergenic	Intergenic
chr10	78545745	78545817	BRN_WT_1727	+	Intergenic	Intergenic
chr10	78588887	78588901	BRN_WT_1728	+	Intergenic	Intergenic
chr10	79342860	79342872	BRN_WT_1729	-	Intergenic	Intergenic
chr10	79406220	79406237	BRN_WT_1730	-	Intergenic	Intergenic
chr10	79637740	79637757	BRN_WT_1731	-	Shc2	Coding_cdsexon
chr10	79703510	79703590	BRN_WT_1732	-	Gm25794	Noncoding_exon
chr10	79735576	79735633	BRN_WT_1733	+	Hcn2	UTR3
chr10	79741409	79741428	BRN_WT_1734	-	Polrmt	Coding_intron
chr10	79850386	79850402	BRN_WT_1735	-	Intergenic	Intergenic
chr10	79909194	79909300	BRN_WT_1736	+	Gm24019	Noncoding_exon
chr10	79985505	79985611	BRN_WT_1737	+	Gm26243	Noncoding_exon
chr10	80097128	80097141	BRN_WT_1738	-	Sbno2	Coding_intron
chr10	80107218	80107253	BRN_WT_1739	+	Intergenic	Intergenic
chr10	80179494	80179511	BRN_WT_1740	-	Intergenic	Intergenic
chr10	80249193	80249233	BRN_WT_1741	+	Ndufs7	Coding_intron
chr10	80256727	80256791	BRN_WT_1742	+	Ndufs7	UTR3
chr10	80343540	80343552	BRN_WT_1743	+	Intergenic	Intergenic
chr10	80535460	80535477	BRN_WT_1744	+	Intergenic	Intergenic
chr10	80557777	80557795	BRN_WT_1745	-	Rexo1	Coding_intron
chr10	80629164	80629181	BRN_WT_1746	-	Intergenic	Intergenic
chr10	80667061	80667092	BRN_WT_1747	-	Mknk2	UTR3
chr10	80733881	80733927	BRN_WT_1748	-	Ap3d1	Coding_intron
chr10	80811834	80811847	BRN_WT_1749	+	Intergenic	Intergenic
chr10	80857939	80857952	BRN_WT_1750	+	Sppl2b	Coding_intron
chr10	80997690	80997704	BRN_WT_1751	+	Intergenic	Intergenic
chr10	81122136	81122152	BRN_WT_1752	+	Map2k2	Coding_intron
chr10	81151553	81151646	BRN_WT_1753	+	Zbtb7a	UTR3
chr10	81151875	81151914	BRN_WT_1754	+	Zbtb7a	UTR3
chr10	81179924	81179955	BRN_WT_1755	+	Eef2	Coding_cdsexon
chr10	81182239	81182286	BRN_WT_1756	+	Eef2	UTR3
chr10	81319413	81319519	BRN_WT_1757	+	Pip5k1c	UTR3
chr10	81319624	81319696	BRN_WT_1758	+	Pip5k1c	UTR3
chr10	81319745	81319775	BRN_WT_1759	+	Pip5k1c	UTR3
chr10	81459949	81460021	BRN_WT_1760	-	Celf5	UTR3
chr10	81460893	81460924	BRN_WT_1761	-	Celf5	UTR3
chr10	81565910	81565951	BRN_WT_1762	+	Aes	UTR3
chr10	81587401	81587417	BRN_WT_1763	+	Tle2	Coding_intron
chr10	81650465	81650480	BRN_WT_1764	+	Gm10778	Coding_intron
chr10	82740996	82741071	BRN_WT_1765	+	Hcfc2	UTR3
chr10	82748934	82748980	BRN_WT_1766	-	Nfyb	UTR3
chr10	82749309	82749348	BRN_WT_1767	-	Nfyb	UTR3
chr10	82749845	82749884	BRN_WT_1768	-	Nfyb	UTR3
chr10	82750065	82750183	BRN_WT_1769	-	Nfyb	UTR3
chr10	82795309	82795322	BRN_WT_1770	-	Intergenic	Intergenic
chr10	83193312	83193469	BRN_WT_1771	+	Chst11	UTR3
chr10	83634019	83634172	BRN_WT_1772	-	Appl2	Coding_intron
chr10	84863391	84863408	BRN_WT_1773	+	Rfx4	Coding_intron
chr10	84906253	84906321	BRN_WT_1774	+	Rfx4	UTR3
chr10	85117033	85117080	BRN_WT_1775	+	Tmem263	UTR3
chr10	85117188	85117256	BRN_WT_1776	+	Tmem263	UTR3
chr10	85131997	85132160	BRN_WT_1777	-	Cry1	UTR3
chr10	86346865	86346918	BRN_WT_1778	+	Timp3	UTR3
chr10	86347456	86347509	BRN_WT_1779	+	Timp3	UTR3
chr10	86347583	86347745	BRN_WT_1780	+	Timp3	UTR3
chr10	86365690	86365703	BRN_WT_1781	+	Intergenic	Intergenic
chr10	86690839	86690981	BRN_WT_1782	-	Hsp90b1	UTR3
chr10	86691060	86691100	BRN_WT_1783	-	Hsp90b1	UTR3
chr10	86813591	86813606	BRN_WT_1784	+	Nt5dc3	Coding_intron
chr10	87340017	87340032	BRN_WT_1785	-	Intergenic	Intergenic
chr10	87491188	87491313	BRN_WT_1786	-	Ascl1	UTR3
chr10	87521669	87521686	BRN_WT_1787	+	Intergenic	Intergenic
chr10	88319065	88319079	BRN_WT_1788	-	Intergenic	Intergenic
chr10	88350217	88350306	BRN_WT_1789	-	Dram1	Coding_intron
chr10	88446539	88446609	BRN_WT_1790	+	Gnptab	UTR3
chr10	88447244	88447310	BRN_WT_1791	+	Gnptab	UTR3
chr10	88468148	88468225	BRN_WT_1792	-	Chpt1	Coding_intron
chr10	88468925	88468979	BRN_WT_1793	-	Chpt1	Coding_intron
chr10	88469027	88469160	BRN_WT_1794	-	Chpt1	Coding_intron
chr10	88469446	88469533	BRN_WT_1795	-	Chpt1	Coding_intron
chr10	88469837	88469912	BRN_WT_1796	-	Chpt1	UTR3
chr10	88469998	88470052	BRN_WT_1797	-	Chpt1	UTR3
chr10	88470433	88470522	BRN_WT_1798	-	Chpt1	UTR3
chr10	88470538	88470603	BRN_WT_1799	-	Chpt1	UTR3
chr10	88471064	88471177	BRN_WT_1800	-	Chpt1	UTR3
chr10	88471278	88471339	BRN_WT_1801	-	Chpt1	UTR3
chr10	88471695	88471757	BRN_WT_1802	-	Chpt1	UTR3
chr10	88472884	88472923	BRN_WT_1803	-	Chpt1	UTR3
chr10	88472966	88473000	BRN_WT_1804	-	Chpt1	UTR3
chr10	88473449	88473536	BRN_WT_1805	-	Chpt1	UTR3
chr10	88473756	88473827	BRN_WT_1806	-	Chpt1	UTR3
chr10	88473872	88473926	BRN_WT_1807	-	Chpt1	UTR3
chr10	88474011	88474156	BRN_WT_1808	-	Chpt1	UTR3
chr10	88474348	88474489	BRN_WT_1809	-	Chpt1	UTR3
chr10	88474520	88474590	BRN_WT_1810	-	Chpt1	UTR3
chr10	88474609	88474719	BRN_WT_1811	-	Chpt1	UTR3
chr10	88474775	88474808	BRN_WT_1812	-	Chpt1	UTR3
chr10	88743260	88743289	BRN_WT_1813	+	Arl1	UTR3
chr10	89423262	89423303	BRN_WT_1814	-	Gas2l3	Coding_intron
chr10	89690378	89690440	BRN_WT_1815	+	1500026H17Rik	Noncoding_intron
chr10	89696978	89696991	BRN_WT_1816	-	Intergenic	Intergenic
chr10	89802495	89802751	BRN_WT_1817	+	Uhrf1bp1l	Coding_intron
chr10	89818506	89818546	BRN_WT_1818	+	Uhrf1bp1l	UTR3
chr10	90085460	90085538	BRN_WT_1819	+	Anks1b	Coding_intron
chr10	90101285	90101444	BRN_WT_1820	+	Anks1b	Coding_intron
chr10	90104122	90104165	BRN_WT_1821	+	Anks1b	Coding_intron
chr10	90145132	90145213	BRN_WT_1822	+	Anks1b	Coding_intron
chr10	90211912	90211926	BRN_WT_1823	+	Anks1b	Coding_intron
chr10	90586064	90586164	BRN_WT_1824	+	Anks1b	Coding_intron
chr10	90720438	90720562	BRN_WT_1825	+	Anks1b	Coding_intron
chr10	90727502	90727561	BRN_WT_1826	+	Anks1b	Coding_intron
chr10	90886869	90886946	BRN_WT_1827	+	Anks1b	Coding_intron
chr10	90968253	90968299	BRN_WT_1828	+	Anks1b	UTR3
chr10	90969954	90969986	BRN_WT_1829	+	Anks1b	UTR3
chr10	90970227	90970256	BRN_WT_1830	+	Anks1b	UTR3
chr10	90970605	90970671	BRN_WT_1831	+	Anks1b	UTR3
chr10	90970807	90971035	BRN_WT_1832	+	Anks1b	UTR3
chr10	90971081	90971366	BRN_WT_1833	+	Anks1b	UTR3
chr10	90971449	90971689	BRN_WT_1834	+	Anks1b	UTR3
chr10	91116843	91116930	BRN_WT_1835	-	Slc25a3	UTR3
chr10	91927644	91927660	BRN_WT_1836	+	Intergenic	Intergenic
chr10	92230250	92230309	BRN_WT_1837	-	Gm20757	Noncoding_intron
chr10	92247424	92247438	BRN_WT_1838	+	Intergenic	Intergenic
chr10	92406599	92406612	BRN_WT_1839	-	Intergenic	Intergenic
chr10	92684761	92684858	BRN_WT_1840	-	Nedd1	UTR3
chr10	93160790	93160815	BRN_WT_1841	+	Intergenic	Intergenic
chr10	93239819	93239870	BRN_WT_1842	+	Cdk17	UTR3
chr10	93240018	93240286	BRN_WT_1843	+	Cdk17	UTR3
chr10	93240451	93240510	BRN_WT_1844	+	Cdk17	UTR3
chr10	93240976	93241094	BRN_WT_1845	+	Cdk17	UTR3
chr10	93241222	93241300	BRN_WT_1846	+	Cdk17	UTR3
chr10	93311115	93311134	BRN_WT_1847	+	Intergenic	Intergenic
chr10	93351931	93351991	BRN_WT_1848	+	Intergenic	Intergenic
chr10	93428129	93428167	BRN_WT_1849	+	Intergenic	Intergenic
chr10	93452975	93453043	BRN_WT_1850	-	Intergenic	Intergenic
chr10	93589440	93589455	BRN_WT_1851	+	4933408J17Rik	UTR5
chr10	93695310	93695323	BRN_WT_1852	-	Intergenic	Intergenic
chr10	93801390	93801410	BRN_WT_1853	+	Intergenic	Intergenic
chr10	93802441	93802457	BRN_WT_1854	+	Intergenic	Intergenic
chr10	94141923	94141986	BRN_WT_1855	+	Fgd6	UTR3
chr10	94142314	94142367	BRN_WT_1856	+	Fgd6	UTR3
chr10	94145241	94145311	BRN_WT_1857	+	Fgd6	UTR3
chr10	94592432	94592509	BRN_WT_1858	-	Tmcc3os	Noncoding_intron
chr10	94872151	94872222	BRN_WT_1859	-	Plxnc1	Coding_intron
chr10	94889323	94889475	BRN_WT_1860	-	Plxnc1	Coding_intron
chr10	95259391	95259407	BRN_WT_1861	-	Cradd	Coding_intron
chr10	95398618	95398630	BRN_WT_1862	+	Intergenic	Intergenic
chr10	95543003	95543090	BRN_WT_1863	+	Ube2n	UTR3
chr10	95545097	95545199	BRN_WT_1864	+	Ube2n	UTR3
chr10	95547031	95547152	BRN_WT_1865	-	Nudt4	UTR3
chr10	95547503	95548052	BRN_WT_1866	-	Nudt4	UTR3
chr10	95548080	95548248	BRN_WT_1867	-	Nudt4	UTR3
chr10	95548775	95548897	BRN_WT_1868	-	Nudt4	UTR3
chr10	95548972	95549166	BRN_WT_1869	-	Nudt4	UTR3
chr10	95552504	95552552	BRN_WT_1870	-	Nudt4	Coding_cdsexon
chr10	96042342	96042533	BRN_WT_1871	+	Eea1	UTR3
chr10	96042654	96042782	BRN_WT_1872	+	Eea1	UTR3
chr10	96043094	96043113	BRN_WT_1873	+	Eea1	UTR3
chr10	96044309	96044393	BRN_WT_1874	+	Eea1	UTR3
chr10	96044555	96044798	BRN_WT_1875	+	Eea1	UTR3
chr10	96044847	96045161	BRN_WT_1876	+	Eea1	UTR3
chr10	96045209	96045355	BRN_WT_1877	+	Eea1	UTR3
chr10	96045389	96045475	BRN_WT_1878	+	Eea1	UTR3
chr10	96618697	96618740	BRN_WT_1879	+	Btg1	UTR3
chr10	96618818	96618929	BRN_WT_1880	+	Btg1	UTR3
chr10	96619103	96619274	BRN_WT_1881	+	Btg1	UTR3
chr10	96619294	96619601	BRN_WT_1882	+	Btg1	UTR3
chr10	97161161	97161173	BRN_WT_1883	+	Intergenic	Intergenic
chr10	97418381	97418393	BRN_WT_1884	+	Intergenic	Intergenic
chr10	97712866	97712882	BRN_WT_1885	+	Intergenic	Intergenic
chr10	98074822	98074878	BRN_WT_1886	-	Intergenic	Intergenic
chr10	98672106	98672119	BRN_WT_1887	+	Intergenic	Intergenic
chr10	98764976	98765052	BRN_WT_1888	+	Intergenic	Intergenic
chr10	99022838	99022939	BRN_WT_1889	+	Atp2b1	Coding_cdsexon
chr10	99023055	99023094	BRN_WT_1890	+	Atp2b1	Coding_cdsexon
chr10	99023232	99023351	BRN_WT_1891	+	Atp2b1	UTR3
chr10	99023435	99023481	BRN_WT_1892	+	Atp2b1	UTR3
chr10	99023544	99023678	BRN_WT_1893	+	Atp2b1	UTR3
chr10	99023707	99023796	BRN_WT_1894	+	Atp2b1	UTR3
chr10	99023949	99024010	BRN_WT_1895	+	Atp2b1	UTR3
chr10	99024109	99024200	BRN_WT_1896	+	Atp2b1	UTR3
chr10	99024571	99024636	BRN_WT_1897	+	Atp2b1	UTR3
chr10	99024889	99025190	BRN_WT_1898	+	Atp2b1	UTR3
chr10	99025294	99025502	BRN_WT_1899	+	Atp2b1	UTR3
chr10	99025531	99025890	BRN_WT_1900	+	Atp2b1	UTR3
chr10	99025931	99025999	BRN_WT_1901	+	Atp2b1	UTR3
chr10	99026077	99026140	BRN_WT_1902	+	Atp2b1	UTR3
chr10	99062672	99062689	BRN_WT_1903	-	Intergenic	Intergenic
chr10	99266834	99266885	BRN_WT_1904	+	Dusp6	UTR3
chr10	99267099	99267168	BRN_WT_1905	+	Dusp6	UTR3
chr10	99278930	99278943	BRN_WT_1906	-	Intergenic	Intergenic
chr10	99439313	99439328	BRN_WT_1907	+	Intergenic	Intergenic
chr10	99446380	99446408	BRN_WT_1908	+	Gad1-ps	UTR3
chr10	99446872	99446901	BRN_WT_1909	+	Gad1-ps	UTR3
chr10	99449666	99449705	BRN_WT_1910	-	Intergenic	Intergenic
chr10	99565858	99565979	BRN_WT_1911	-	Intergenic	Intergenic
chr10	99919293	99919309	BRN_WT_1912	+	Intergenic	Intergenic
chr10	99980716	99980731	BRN_WT_1913	+	Intergenic	Intergenic
chr10	100037137	100037163	BRN_WT_1914	-	Intergenic	Intergenic
chr10	100097869	100097950	BRN_WT_1915	+	Kitl	UTR3
chr10	100099255	100099356	BRN_WT_1916	+	Kitl	UTR3
chr10	100100251	100100357	BRN_WT_1917	+	Kitl	UTR3
chr10	100740590	100740615	BRN_WT_1918	-	Intergenic	Intergenic
chr10	100744318	100744350	BRN_WT_1919	-	Intergenic	Intergenic
chr10	101683296	101683364	BRN_WT_1920	+	Mgat4c	Coding_intron
chr10	102050376	102050394	BRN_WT_1921	+	Mgat4c	Coding_intron
chr10	102069423	102069481	BRN_WT_1922	+	Mgat4c	Coding_intron
chr10	102131723	102131782	BRN_WT_1923	+	Mgat4c	Coding_intron
chr10	102362003	102362051	BRN_WT_1924	-	Intergenic	Intergenic
chr10	102539126	102539141	BRN_WT_1925	-	Intergenic	Intergenic
chr10	102668629	102668703	BRN_WT_1926	-	Intergenic	Intergenic
chr10	104386282	104386307	BRN_WT_1927	+	Intergenic	Intergenic
chr10	104579944	104579960	BRN_WT_1928	-	Intergenic	Intergenic
chr10	105170591	105170604	BRN_WT_1929	-	Intergenic	Intergenic
chr10	105187716	105187755	BRN_WT_1930	-	Tmtc2	UTR3
chr10	105187879	105187916	BRN_WT_1931	-	Tmtc2	UTR3
chr10	105518897	105518965	BRN_WT_1932	-	Tmtc2	Coding_intron
chr10	105781261	105781278	BRN_WT_1933	+	Intergenic	Intergenic
chr10	106592651	106592668	BRN_WT_1934	-	Intergenic	Intergenic
chr10	106642903	106642965	BRN_WT_1935	+	Ppfia2	Coding_intron
chr10	106777766	106777784	BRN_WT_1936	+	Ppfia2	UTR3
chr10	106931421	106931495	BRN_WT_1937	+	Ppfia2	UTR3
chr10	106932394	106932457	BRN_WT_1938	+	Ppfia2	UTR3
chr10	107421266	107421318	BRN_WT_1939	+	Lin7a	UTR3
chr10	107989793	107989813	BRN_WT_1940	-	Intergenic	Intergenic
chr10	108104739	108104753	BRN_WT_1941	-	Intergenic	Intergenic
chr10	108277722	108277857	BRN_WT_1942	+	Intergenic	Intergenic
chr10	108277955	108278231	BRN_WT_1943	+	Intergenic	Intergenic
chr10	108278347	108278480	BRN_WT_1944	+	Intergenic	Intergenic
chr10	108278651	108278700	BRN_WT_1945	+	Intergenic	Intergenic
chr10	108278752	108278914	BRN_WT_1946	+	Intergenic	Intergenic
chr10	108279139	108279368	BRN_WT_1947	+	Intergenic	Intergenic
chr10	108279409	108279607	BRN_WT_1948	+	Intergenic	Intergenic
chr10	108430687	108430704	BRN_WT_1949	-	Intergenic	Intergenic
chr10	108497653	108497977	BRN_WT_1950	-	Syt1	UTR3
chr10	108498007	108498085	BRN_WT_1951	-	Syt1	UTR3
chr10	108498099	108498165	BRN_WT_1952	-	Syt1	UTR3
chr10	108498322	108498369	BRN_WT_1953	-	Syt1	UTR3
chr10	108498673	108498752	BRN_WT_1954	-	Syt1	UTR3
chr10	108498780	108499381	BRN_WT_1955	-	Syt1	UTR3
chr10	108499424	108499597	BRN_WT_1956	-	Syt1	UTR3
chr10	108499627	108499757	BRN_WT_1957	-	Syt1	UTR3
chr10	108499905	108499951	BRN_WT_1958	-	Syt1	UTR3
chr10	108499974	108500531	BRN_WT_1959	-	Syt1	UTR3
chr10	108548313	108548363	BRN_WT_1960	-	Syt1	Coding_intron
chr10	108606906	108606929	BRN_WT_1961	+	Intergenic	Intergenic
chr10	108828518	108828589	BRN_WT_1962	-	Syt1	Coding_intron
chr10	108885150	108885271	BRN_WT_1963	-	Syt1	Coding_intron
chr10	108972123	108972194	BRN_WT_1964	-	Syt1	Coding_intron
chr10	109005490	109005538	BRN_WT_1965	-	Syt1	Coding_intron
chr10	109396053	109396091	BRN_WT_1966	-	Intergenic	Intergenic
chr10	109640768	109640836	BRN_WT_1967	-	Intergenic	Intergenic
chr10	109681591	109681695	BRN_WT_1968	-	Intergenic	Intergenic
chr10	109681737	109681863	BRN_WT_1969	-	Intergenic	Intergenic
chr10	109683683	109683730	BRN_WT_1970	-	Nav3	UTR3
chr10	109730711	109730880	BRN_WT_1971	-	Nav3	Coding_intron
chr10	109823559	109823578	BRN_WT_1972	-	Nav3	Coding_cdsexon
chr10	109990579	109990783	BRN_WT_1973	-	Nav3	Coding_intron
chr10	110003268	110003307	BRN_WT_1974	-	Nav3	Noncoding_intron
chr10	110069488	110069602	BRN_WT_1975	-	Nav3	Noncoding_intron
chr10	110123350	110123410	BRN_WT_1976	-	Nav3	Noncoding_intron
chr10	110166578	110166591	BRN_WT_1977	+	Intergenic	Intergenic
chr10	110207662	110207721	BRN_WT_1978	-	Nav3	Noncoding_intron
chr10	110941813	110942023	BRN_WT_1979	-	Zdhhc17	UTR3
chr10	110942276	110942376	BRN_WT_1980	-	Zdhhc17	UTR3
chr10	110942396	110942427	BRN_WT_1981	-	Zdhhc17	UTR3
chr10	110942457	110943121	BRN_WT_1982	-	Zdhhc17	UTR3
chr10	110943186	110943209	BRN_WT_1983	-	Zdhhc17	UTR3
chr10	110943224	110943294	BRN_WT_1984	-	Zdhhc17	UTR3
chr10	110943361	110943442	BRN_WT_1985	-	Zdhhc17	UTR3
chr10	110943525	110943684	BRN_WT_1986	-	Zdhhc17	UTR3
chr10	110943858	110943886	BRN_WT_1987	-	Zdhhc17	UTR3
chr10	110944182	110944335	BRN_WT_1988	-	Zdhhc17	UTR3
chr10	111293565	111293626	BRN_WT_1989	+	Osbpl8	UTR3
chr10	111293658	111293979	BRN_WT_1990	+	Osbpl8	UTR3
chr10	111294715	111294858	BRN_WT_1991	+	Osbpl8	UTR3
chr10	111294879	111295026	BRN_WT_1992	+	Osbpl8	UTR3
chr10	111295814	111295934	BRN_WT_1993	+	Osbpl8	UTR3
chr10	111296109	111296282	BRN_WT_1994	+	Osbpl8	UTR3
chr10	111296286	111296319	BRN_WT_1995	+	Osbpl8	UTR3
chr10	111296491	111296553	BRN_WT_1996	+	Osbpl8	UTR3
chr10	111296995	111297203	BRN_WT_1997	+	Osbpl8	UTR3
[truncated: 16,368 more rows]

## Sheet: PUM2 CLIP clusters in KO brain
Supplementary Table 1: PUM2 CLIP clusters in Norad-/- brain
Merged clusters from both replicates shown, genomic coordinates for mm10
chr	start	stop	id	strand	gene_id	annotation_type
chr1	3199830	3200223	BRN_KO_1	-	Intergenic	Intergenic
chr1	3200236	3200379	BRN_KO_2	-	Intergenic	Intergenic
chr1	3200394	3200555	BRN_KO_3	-	Intergenic	Intergenic
chr1	3200727	3200771	BRN_KO_4	-	Intergenic	Intergenic
chr1	3205326	3205351	BRN_KO_5	-	Intergenic	Intergenic
chr1	3205554	3205670	BRN_KO_6	-	Intergenic	Intergenic
chr1	3211789	3212005	BRN_KO_7	-	Xkr4	Noncoding_intron
chr1	3214262	3214414	BRN_KO_8	-	Xkr4	Noncoding_exon
chr1	3214445	3214666	BRN_KO_9	-	Xkr4	UTR3
chr1	3215118	3215271	BRN_KO_10	-	Xkr4	UTR3
chr1	3215423	3215551	BRN_KO_11	-	Xkr4	UTR3
chr1	3287407	3287452	BRN_KO_12	-	Xkr4	Coding_intron
chr1	3287595	3287674	BRN_KO_13	-	Xkr4	Coding_intron
chr1	3294649	3294737	BRN_KO_14	-	Xkr4	Coding_intron
chr1	3358019	3358089	BRN_KO_15	-	Xkr4	Coding_intron
chr1	3406433	3406533	BRN_KO_16	-	Xkr4	Coding_intron
chr1	3459193	3459301	BRN_KO_17	-	Xkr4	Coding_intron
chr1	3567102	3567275	BRN_KO_18	-	Xkr4	Coding_intron
chr1	3670951	3671154	BRN_KO_19	-	Xkr4	Coding_cdsexon
chr1	3671650	3671722	BRN_KO_20	-	Intergenic	Intergenic
chr1	4405453	4405472	BRN_KO_21	-	Rp1	Coding_intron
chr1	4449028	4449086	BRN_KO_22	+	Intergenic	Intergenic
chr1	4611539	4611588	BRN_KO_23	+	Intergenic	Intergenic
chr1	4807971	4807984	BRN_KO_24	-	Intergenic	Intergenic
chr1	4845342	4845485	BRN_KO_25	+	Lypla1	UTR3
chr1	4879559	4879587	BRN_KO_26	-	Intergenic	Intergenic
chr1	4879815	4879921	BRN_KO_27	-	Intergenic	Intergenic
chr1	4896425	4896563	BRN_KO_28	+	Tcea1	UTR3
chr1	4896633	4896711	BRN_KO_29	+	Tcea1	UTR3
chr1	4896986	4897061	BRN_KO_30	+	Tcea1	UTR3
chr1	4897284	4897421	BRN_KO_31	+	Tcea1	UTR3
chr1	4897444	4897568	BRN_KO_32	+	Tcea1	UTR3
chr1	4946134	4946314	BRN_KO_33	-	Rgs20	Coding_intron
chr1	5001892	5001936	BRN_KO_34	-	Rgs20	Coding_intron
chr1	5109371	5109413	BRN_KO_35	+	Atp6v1h	Coding_intron
chr1	5109485	5109537	BRN_KO_36	+	Atp6v1h	Coding_intron
chr1	5109660	5109709	BRN_KO_37	+	Atp6v1h	Coding_intron
chr1	5109770	5109814	BRN_KO_38	+	Atp6v1h	Coding_intron
chr1	5109947	5109983	BRN_KO_39	+	Atp6v1h	Coding_intron
chr1	5110004	5110057	BRN_KO_40	+	Atp6v1h	Coding_intron
chr1	5111178	5111229	BRN_KO_41	+	Atp6v1h	Coding_intron
chr1	5111235	5111286	BRN_KO_42	+	Atp6v1h	Coding_intron
chr1	5111298	5111400	BRN_KO_43	+	Atp6v1h	Coding_intron
chr1	5111467	5111514	BRN_KO_44	+	Atp6v1h	Coding_intron
chr1	5111585	5111630	BRN_KO_45	+	Atp6v1h	Coding_intron
chr1	5111638	5111742	BRN_KO_46	+	Atp6v1h	Coding_intron
chr1	5111809	5111855	BRN_KO_47	+	Atp6v1h	Coding_intron
chr1	5111936	5111968	BRN_KO_48	+	Atp6v1h	Coding_intron
chr1	5111994	5112085	BRN_KO_49	+	Atp6v1h	Coding_intron
chr1	5112087	5112196	BRN_KO_50	+	Atp6v1h	Coding_intron
chr1	5112211	5112310	BRN_KO_51	+	Atp6v1h	Coding_intron
chr1	5112371	5112426	BRN_KO_52	+	Atp6v1h	Coding_intron
chr1	5112445	5112537	BRN_KO_53	+	Atp6v1h	Coding_intron
chr1	5112549	5112592	BRN_KO_54	+	Atp6v1h	Coding_intron
chr1	5112835	5112879	BRN_KO_55	+	Atp6v1h	Coding_intron
chr1	5113067	5113108	BRN_KO_56	+	Atp6v1h	Coding_intron
chr1	5113179	5113218	BRN_KO_57	+	Atp6v1h	Coding_intron
chr1	5113284	5113335	BRN_KO_58	+	Atp6v1h	Coding_intron
chr1	5113579	5113619	BRN_KO_59	+	Atp6v1h	Coding_intron
chr1	5113633	5113735	BRN_KO_60	+	Atp6v1h	Coding_intron
chr1	5113744	5113789	BRN_KO_61	+	Atp6v1h	Coding_intron
chr1	5113809	5113845	BRN_KO_62	+	Atp6v1h	Coding_intron
chr1	5113862	5113904	BRN_KO_63	+	Atp6v1h	Coding_intron
chr1	5113914	5113961	BRN_KO_64	+	Atp6v1h	Coding_intron
chr1	5114035	5114085	BRN_KO_65	+	Atp6v1h	Coding_intron
chr1	5114094	5114130	BRN_KO_66	+	Atp6v1h	Coding_intron
chr1	5114164	5114188	BRN_KO_67	+	Atp6v1h	Coding_intron
chr1	5114208	5114245	BRN_KO_68	+	Atp6v1h	Coding_intron
chr1	5114371	5114424	BRN_KO_69	+	Atp6v1h	Coding_intron
chr1	5114477	5114529	BRN_KO_70	+	Atp6v1h	Coding_intron
chr1	5162335	5162415	BRN_KO_71	+	Atp6v1h	UTR3
chr1	5222682	5222729	BRN_KO_72	+	Intergenic	Intergenic
chr1	6248796	6248967	BRN_KO_73	+	Rb1cc1	Coding_cdsexon
chr1	6248998	6249103	BRN_KO_74	+	Rb1cc1	Coding_cdsexon
chr1	6274559	6274708	BRN_KO_75	+	Rb1cc1	UTR3
chr1	6275043	6275172	BRN_KO_76	+	Rb1cc1	UTR3
chr1	6620631	6620715	BRN_KO_77	+	St18	Coding_intron
chr1	7038804	7038854	BRN_KO_78	+	Intergenic	Intergenic
chr1	7169924	7170078	BRN_KO_79	+	Pcmtd1	UTR3
chr1	7170083	7170182	BRN_KO_80	+	Pcmtd1	UTR3
chr1	7170235	7170383	BRN_KO_81	+	Pcmtd1	UTR3
chr1	7170597	7170674	BRN_KO_82	+	Pcmtd1	UTR3
chr1	7170795	7170953	BRN_KO_83	+	Pcmtd1	UTR3
chr1	7171694	7172002	BRN_KO_84	+	Pcmtd1	UTR3
chr1	7172026	7172104	BRN_KO_85	+	Pcmtd1	UTR3
chr1	7398652	7398672	BRN_KO_86	-	Intergenic	Intergenic
chr1	7417224	7417247	BRN_KO_87	-	Intergenic	Intergenic
chr1	7880812	7880875	BRN_KO_88	-	Intergenic	Intergenic
chr1	8359798	8359887	BRN_KO_89	-	Intergenic	Intergenic
chr1	8359973	8360054	BRN_KO_90	-	Intergenic	Intergenic
chr1	8360580	8360638	BRN_KO_91	-	Intergenic	Intergenic
chr1	8360977	8361018	BRN_KO_92	-	Intergenic	Intergenic
chr1	8363165	8363256	BRN_KO_93	-	Sntg1	UTR3
chr1	8453843	8453982	BRN_KO_94	-	Sntg1	Coding_intron
chr1	8470579	8470684	BRN_KO_95	-	Sntg1	Coding_intron
chr1	9296058	9296119	BRN_KO_96	+	Intergenic	Intergenic
chr1	9363448	9363464	BRN_KO_97	+	Intergenic	Intergenic
chr1	9575875	9576026	BRN_KO_98	+	Adhfe1	Coding_intron
chr1	9625307	9625465	BRN_KO_99	+	3110035E14Rik	UTR3
chr1	9625538	9625649	BRN_KO_100	+	3110035E14Rik	UTR3
chr1	9667669	9667705	BRN_KO_101	-	Mybl1	UTR3
chr1	9721564	9721721	BRN_KO_102	-	Vcpip1	UTR3
chr1	9721885	9722046	BRN_KO_103	-	Vcpip1	UTR3
chr1	9722070	9722150	BRN_KO_104	-	Vcpip1	UTR3
chr1	9723215	9723719	BRN_KO_105	-	Vcpip1	UTR3
chr1	9723728	9723801	BRN_KO_106	-	Vcpip1	UTR3
chr1	9724176	9724448	BRN_KO_107	-	Vcpip1	UTR3
chr1	10071470	10071562	BRN_KO_108	+	Cspp1	Coding_intron
chr1	10100549	10100728	BRN_KO_109	+	Cspp1	Coding_intron
chr1	10101299	10101413	BRN_KO_110	+	Cspp1	Coding_intron
chr1	10137587	10137740	BRN_KO_111	-	Arfgef1	UTR3
chr1	10137794	10137934	BRN_KO_112	-	Arfgef1	UTR3
chr1	10138119	10138443	BRN_KO_113	-	Arfgef1	UTR3
chr1	10138490	10138561	BRN_KO_114	-	Arfgef1	UTR3
chr1	10138628	10138665	BRN_KO_115	-	Arfgef1	UTR3
chr1	10186636	10186789	BRN_KO_116	-	Arfgef1	Coding_intron
chr1	10215111	10215189	BRN_KO_117	-	Arfgef1	Coding_intron
chr1	10232708	10232858	BRN_KO_118	-	Intergenic	Intergenic
chr1	10232897	10232970	BRN_KO_119	-	Intergenic	Intergenic
chr1	10233061	10233089	BRN_KO_120	-	Intergenic	Intergenic
chr1	10683659	10683738	BRN_KO_121	-	Cpa6	Coding_intron
chr1	11015752	11015818	BRN_KO_122	+	Prex2	Coding_intron
chr1	11068023	11068063	BRN_KO_123	+	Prex2	Coding_cdsexon
chr1	11297816	11297899	BRN_KO_124	+	Prex2	UTR3
chr1	11297913	11298306	BRN_KO_125	+	Prex2	UTR3
chr1	11298318	11298365	BRN_KO_126	+	Prex2	UTR3
chr1	11298391	11298461	BRN_KO_127	+	Prex2	UTR3
chr1	11298479	11298557	BRN_KO_128	+	Prex2	UTR3
chr1	11298560	11298956	BRN_KO_129	+	Prex2	UTR3
chr1	11299211	11299290	BRN_KO_130	+	Prex2	UTR3
chr1	11299292	11299435	BRN_KO_131	+	Prex2	UTR3
chr1	11299770	11300142	BRN_KO_132	+	Prex2	UTR3
chr1	11301428	11301592	BRN_KO_133	+	Prex2	UTR3
chr1	11301692	11301909	BRN_KO_134	+	Prex2	UTR3
chr1	11301923	11302015	BRN_KO_135	+	Prex2	UTR3
chr1	11302042	11302423	BRN_KO_136	+	Prex2	UTR3
chr1	11302829	11303161	BRN_KO_137	+	Prex2	UTR3
chr1	11303164	11303673	BRN_KO_138	+	Prex2	UTR3
chr1	11596373	11596713	BRN_KO_139	+	A830018L16Rik	UTR3
chr1	11598403	11598839	BRN_KO_140	+	A830018L16Rik	UTR3
chr1	11601267	11601338	BRN_KO_141	+	A830018L16Rik	UTR3
chr1	11601458	11601494	BRN_KO_142	+	A830018L16Rik	UTR3
chr1	11976697	11976748	BRN_KO_143	+	Intergenic	Intergenic
chr1	12198498	12198554	BRN_KO_144	-	Intergenic	Intergenic
chr1	12794682	12794737	BRN_KO_145	-	Intergenic	Intergenic
chr1	13139125	13139816	BRN_KO_146	-	Ncoa2	UTR3
chr1	13139828	13139901	BRN_KO_147	-	Ncoa2	UTR3
chr1	13141415	13141584	BRN_KO_148	-	Ncoa2	UTR3
chr1	13142366	13142434	BRN_KO_149	-	Ncoa2	UTR3
chr1	13541873	13541900	BRN_KO_150	+	Intergenic	Intergenic
chr1	13565124	13565153	BRN_KO_151	-	Tram1	UTR3
chr1	13626495	13626540	BRN_KO_152	-	Lactb2	UTR3
chr1	14005435	14005509	BRN_KO_153	+	Intergenic	Intergenic
chr1	14071829	14071892	BRN_KO_154	-	Intergenic	Intergenic
chr1	14169821	14169948	BRN_KO_155	-	Eya1	UTR3
chr1	14839343	14839394	BRN_KO_156	-	Intergenic	Intergenic
chr1	14839692	14839748	BRN_KO_157	-	Intergenic	Intergenic
chr1	15326694	15326872	BRN_KO_158	+	Kcnb2	Coding_intron
chr1	15344625	15344926	BRN_KO_159	+	Kcnb2	Coding_intron
chr1	15379803	15379864	BRN_KO_160	+	Kcnb2	Coding_intron
chr1	15411502	15411603	BRN_KO_161	+	Kcnb2	Coding_intron
chr1	15421601	15422873	BRN_KO_162	+	Kcnb2	Coding_intron
chr1	15483559	15483594	BRN_KO_163	+	Kcnb2	Coding_intron
chr1	15508484	15508559	BRN_KO_164	+	Kcnb2	Coding_intron
chr1	15711988	15712048	BRN_KO_165	+	Kcnb2	UTR3
chr1	15712266	15712371	BRN_KO_166	+	Kcnb2	UTR3
chr1	15713593	15713719	BRN_KO_167	+	Kcnb2	UTR3
chr1	15723414	15723476	BRN_KO_168	+	Kcnb2	UTR3
chr1	16263504	16263562	BRN_KO_169	-	Stau2	Coding_intron
chr1	16321233	16321349	BRN_KO_170	-	Stau2	Coding_intron
chr1	16501953	16502054	BRN_KO_171	-	Stau2	Coding_intron
chr1	16569876	16570003	BRN_KO_172	-	Ube2w	UTR3
chr1	16570185	16570218	BRN_KO_173	-	Ube2w	UTR3
chr1	16641967	16642038	BRN_KO_174	-	Tceb1	UTR3
chr1	16642907	16642934	BRN_KO_175	-	Tceb1	UTR3
chr1	16643161	16643248	BRN_KO_176	-	Tceb1	UTR3
chr1	16995889	16995937	BRN_KO_177	-	Jph1	UTR3
chr1	16995939	16995990	BRN_KO_178	-	Jph1	UTR3
chr1	16996464	16996508	BRN_KO_179	-	Jph1	UTR3
chr1	17097816	17097841	BRN_KO_180	-	Jph1	UTR5
chr1	17308368	17308385	BRN_KO_181	-	Intergenic	Intergenic
chr1	17661795	17661878	BRN_KO_182	-	Intergenic	Intergenic
chr1	18147454	18147491	BRN_KO_183	-	Intergenic	Intergenic
chr1	18597389	18597453	BRN_KO_184	+	Intergenic	Intergenic
chr1	18985476	18985541	BRN_KO_185	+	Intergenic	Intergenic
chr1	19039751	19039823	BRN_KO_186	+	Intergenic	Intergenic
chr1	19152927	19152977	BRN_KO_187	-	Intergenic	Intergenic
chr1	19153238	19153305	BRN_KO_188	-	Intergenic	Intergenic
chr1	19176272	19176346	BRN_KO_189	-	Intergenic	Intergenic
chr1	19572729	19572773	BRN_KO_190	-	Intergenic	Intergenic
chr1	19986351	19986378	BRN_KO_191	-	Intergenic	Intergenic
chr1	19986409	19986442	BRN_KO_192	-	Intergenic	Intergenic
chr1	19986448	19986469	BRN_KO_193	-	Intergenic	Intergenic
chr1	20934726	20934803	BRN_KO_194	+	Paqr8	Coding_cdsexon
chr1	20935612	20935689	BRN_KO_195	+	Paqr8	Coding_cdsexon
chr1	20935690	20935786	BRN_KO_196	+	Paqr8	UTR3
chr1	20935805	20935984	BRN_KO_197	+	Paqr8	UTR3
chr1	20936031	20936085	BRN_KO_198	+	Paqr8	UTR3
chr1	20936429	20936482	BRN_KO_199	+	Paqr8	UTR3
chr1	20936485	20936672	BRN_KO_200	+	Paqr8	UTR3
chr1	20937062	20937261	BRN_KO_201	+	Paqr8	UTR3
chr1	20937288	20937493	BRN_KO_202	+	Paqr8	UTR3
chr1	20937558	20937601	BRN_KO_203	+	Paqr8	UTR3
chr1	20937698	20937734	BRN_KO_204	+	Paqr8	UTR3
chr1	20937834	20938006	BRN_KO_205	+	Paqr8	UTR3
chr1	20938267	20938424	BRN_KO_206	+	Paqr8	UTR3
chr1	20938504	20938605	BRN_KO_207	+	Paqr8	UTR3
chr1	20938624	20938782	BRN_KO_208	+	Paqr8	UTR3
chr1	20938827	20938980	BRN_KO_209	+	Paqr8	UTR3
chr1	20939284	20939361	BRN_KO_210	+	Paqr8	UTR3
chr1	21079134	21079148	BRN_KO_211	+	Intergenic	Intergenic
chr1	21220743	21220793	BRN_KO_212	-	Intergenic	Intergenic
chr1	21269344	21269385	BRN_KO_213	+	Intergenic	Intergenic
chr1	21269442	21269492	BRN_KO_214	+	Intergenic	Intergenic
chr1	21433776	21433875	BRN_KO_215	-	Kcnq5	Coding_intron
chr1	21526480	21526563	BRN_KO_216	-	Kcnq5	Coding_intron
chr1	21562896	21562984	BRN_KO_217	-	Kcnq5	Coding_intron
chr1	21688572	21688686	BRN_KO_218	-	Kcnq5	Coding_intron
chr1	21722636	21722744	BRN_KO_219	-	Kcnq5	Coding_intron
chr1	22323822	22323840	BRN_KO_220	+	Intergenic	Intergenic
chr1	22327518	22328003	BRN_KO_221	-	Rims1	Coding_intron
chr1	22351854	22351884	BRN_KO_222	-	Rims1	Coding_intron
chr1	22360764	22360841	BRN_KO_223	+	Intergenic	Intergenic
chr1	22364436	22364626	BRN_KO_224	-	Rims1	Coding_intron
chr1	22389510	22389669	BRN_KO_225	-	Rims1	Coding_intron
chr1	22513659	22513730	BRN_KO_226	-	Rims1	Coding_intron
chr1	22555900	22555975	BRN_KO_227	+	Intergenic	Intergenic
chr1	22583619	22583703	BRN_KO_228	-	Rims1	Coding_intron
chr1	22584533	22584640	BRN_KO_229	-	Rims1	Coding_intron
chr1	22584648	22584957	BRN_KO_230	-	Rims1	Coding_intron
chr1	22701815	22701848	BRN_KO_231	+	Intergenic	Intergenic
chr1	22788074	22788192	BRN_KO_232	-	Rims1	Coding_intron
chr1	22788269	22788417	BRN_KO_233	-	Rims1	Coding_intron
chr1	22952387	22952457	BRN_KO_234	-	Intergenic	Intergenic
chr1	23272273	23272297	BRN_KO_235	+	Mir30a	Noncoding_exon
chr1	23291712	23291738	BRN_KO_236	+	Gm27028	Noncoding_exon
chr1	23366455	23366597	BRN_KO_237	-	Ogfrl1	UTR3
chr1	23366611	23366874	BRN_KO_238	-	Ogfrl1	UTR3
chr1	23366911	23367284	BRN_KO_239	-	Ogfrl1	UTR3
chr1	23368269	23368356	BRN_KO_240	-	Ogfrl1	UTR3
chr1	23368448	23368907	BRN_KO_241	-	Ogfrl1	UTR3
chr1	23369139	23369299	BRN_KO_242	-	Ogfrl1	UTR3
chr1	23369399	23369616	BRN_KO_243	-	Ogfrl1	UTR3
chr1	23845656	23845731	BRN_KO_244	-	Smap1	UTR3
chr1	23846073	23846144	BRN_KO_245	-	Smap1	UTR3
chr1	23846273	23846371	BRN_KO_246	-	Smap1	UTR3
chr1	23873030	23873077	BRN_KO_247	+	Intergenic	Intergenic
chr1	23922164	23922183	BRN_KO_248	+	Intergenic	Intergenic
chr1	24012189	24012232	BRN_KO_249	-	Fam135a	UTR3
chr1	24359657	24359726	BRN_KO_250	-	Col19a1	Coding_intron
chr1	24586628	24586649	BRN_KO_251	-	Col19a1	Coding_intron
chr1	24594626	24594652	BRN_KO_252	-	Tubb4b-ps2	Noncoding_exon
chr1	24614811	24614869	BRN_KO_253	-	Intergenic	Intergenic
chr1	24762856	24763189	BRN_KO_254	+	Lmbrd1	UTR3
chr1	24763840	24763985	BRN_KO_255	+	Lmbrd1	UTR3
chr1	24764636	24764789	BRN_KO_256	+	Lmbrd1	UTR3
chr1	24765232	24765455	BRN_KO_257	+	Lmbrd1	UTR3
chr1	24766112	24766259	BRN_KO_258	+	Lmbrd1	UTR3
chr1	24989163	24989195	BRN_KO_259	-	Intergenic	Intergenic
chr1	25067550	25067639	BRN_KO_260	-	Adgrb3	UTR3
chr1	25067706	25067860	BRN_KO_261	-	Adgrb3	UTR3
chr1	25067932	25068052	BRN_KO_262	-	Adgrb3	UTR3
chr1	25118606	25118684	BRN_KO_263	-	Adgrb3	Coding_intron
chr1	25276401	25276575	BRN_KO_264	-	Adgrb3	Coding_intron
chr1	25296306	25296378	BRN_KO_265	-	Adgrb3	Coding_intron
chr1	25458894	25458912	BRN_KO_266	-	Adgrb3	Coding_intron
chr1	25507871	25507940	BRN_KO_267	-	Adgrb3	Coding_intron
chr1	25706193	25706430	BRN_KO_268	-	Adgrb3	Coding_intron
chr1	26908244	26908294	BRN_KO_269	-	Intergenic	Intergenic
chr1	27260926	27260985	BRN_KO_270	+	Intergenic	Intergenic
chr1	27263906	27263923	BRN_KO_271	+	Intergenic	Intergenic
chr1	27432733	27432815	BRN_KO_272	-	Intergenic	Intergenic
chr1	27564124	27564148	BRN_KO_273	+	Intergenic	Intergenic
chr1	27847105	27847141	BRN_KO_274	+	Intergenic	Intergenic
chr1	27994489	27994533	BRN_KO_275	+	Intergenic	Intergenic
chr1	28174889	28174954	BRN_KO_276	+	Intergenic	Intergenic
chr1	28578066	28578094	BRN_KO_277	+	Intergenic	Intergenic
chr1	28921875	28921963	BRN_KO_278	+	Intergenic	Intergenic
chr1	29545354	29545416	BRN_KO_279	-	Intergenic	Intergenic
chr1	30262054	30262092	BRN_KO_280	-	Intergenic	Intergenic
chr1	30364530	30364605	BRN_KO_281	+	Intergenic	Intergenic
chr1	30803110	30803271	BRN_KO_282	-	Phf3	UTR3
chr1	30803390	30803607	BRN_KO_283	-	Phf3	UTR3
chr1	30803784	30803917	BRN_KO_284	-	Phf3	Coding_cdsexon
chr1	30804191	30804271	BRN_KO_285	-	Phf3	Coding_cdsexon
chr1	30805851	30805867	BRN_KO_286	+	Intergenic	Intergenic
chr1	30940308	30940440	BRN_KO_287	-	Ptp4a1	UTR3
chr1	30940522	30940738	BRN_KO_288	-	Ptp4a1	UTR3
chr1	30940877	30940966	BRN_KO_289	-	Ptp4a1	UTR3
chr1	30940996	30941146	BRN_KO_290	-	Ptp4a1	UTR3
chr1	30941220	30941427	BRN_KO_291	-	Ptp4a1	UTR3
chr1	30941475	30941523	BRN_KO_292	-	Ptp4a1	UTR3
chr1	30941535	30941584	BRN_KO_293	-	Ptp4a1	UTR3
chr1	30941588	30941821	BRN_KO_294	-	Ptp4a1	UTR3
chr1	30941941	30942130	BRN_KO_295	-	Ptp4a1	UTR3
chr1	30942192	30942415	BRN_KO_296	-	Ptp4a1	UTR3
chr1	30942555	30942633	BRN_KO_297	-	Ptp4a1	UTR3
chr1	30942702	30942897	BRN_KO_298	-	Ptp4a1	UTR3
chr1	31361313	31361379	BRN_KO_299	-	Intergenic	Intergenic
chr1	32231622	32231702	BRN_KO_300	-	Intergenic	Intergenic
chr1	32274600	32274675	BRN_KO_301	+	Khdrbs2	Coding_intron
chr1	32358990	32359067	BRN_KO_302	+	Khdrbs2	Coding_intron
chr1	32417910	32418056	BRN_KO_303	+	Khdrbs2	Coding_intron
chr1	32783334	32783424	BRN_KO_304	+	Intergenic	Intergenic
chr1	33038115	33038144	BRN_KO_305	-	Intergenic	Intergenic
chr1	33502185	33502198	BRN_KO_306	-	Prim2	Coding_intron
chr1	33567139	33571095	BRN_KO_307	-	Prim2	Coding_intron
chr1	33791291	33791380	BRN_KO_308	-	Zfp451	Coding_intron
chr1	33792147	33792205	BRN_KO_309	-	Zfp451	UTR3
chr1	33792413	33792503	BRN_KO_310	-	Zfp451	UTR3
chr1	33793949	33794020	BRN_KO_311	-	Zfp451	UTR3
chr1	33795700	33795832	BRN_KO_312	-	Zfp451	UTR3
chr1	33797239	33797315	BRN_KO_313	-	Zfp451	UTR3
chr1	33797685	33798001	BRN_KO_314	-	Zfp451	UTR3
chr1	33798337	33798497	BRN_KO_315	-	Zfp451	UTR3
chr1	33798538	33798677	BRN_KO_316	-	Zfp451	UTR3
chr1	33798736	33798985	BRN_KO_317	-	Zfp451	UTR3
chr1	33800401	33800546	BRN_KO_318	-	Zfp451	UTR3
chr1	33800824	33800888	BRN_KO_319	-	Zfp451	UTR3
chr1	33920987	33921097	BRN_KO_320	+	Dst	Coding_intron
chr1	33921123	33921274	BRN_KO_321	+	Dst	Coding_intron
chr1	34111584	34111637	BRN_KO_322	+	Dst	Coding_intron
chr1	34244838	34244894	BRN_KO_323	+	Dst	Coding_intron
chr1	34293412	34293476	BRN_KO_324	+	Dst	Coding_cdsexon
chr1	34307603	34307789	BRN_KO_325	+	Dst	UTR3
chr1	34308426	34308499	BRN_KO_326	+	Dst	UTR3
chr1	34354723	34354767	BRN_KO_327	+	Intergenic	Intergenic
chr1	34436746	34436803	BRN_KO_328	-	Ccdc115	UTR3
chr1	34813303	34813371	BRN_KO_329	-	Fam168b	UTR3
chr1	34813582	34813669	BRN_KO_330	-	Fam168b	UTR3
chr1	34815637	34815706	BRN_KO_331	-	Fam168b	UTR3
chr1	34816150	34816384	BRN_KO_332	-	Fam168b	UTR3
chr1	34816399	34816475	BRN_KO_333	-	Fam168b	UTR3
chr1	34816631	34816686	BRN_KO_334	-	Fam168b	UTR3
chr1	34817077	34817157	BRN_KO_335	-	Fam168b	UTR3
chr1	35140805	35140823	BRN_KO_336	-	Intergenic	Intergenic
chr1	36398562	36398614	BRN_KO_337	+	Fer1l5	Coding_intron
chr1	36472052	36472069	BRN_KO_338	-	Intergenic	Intergenic
chr1	36556115	36556130	BRN_KO_339	+	Intergenic	Intergenic
chr1	36673901	36673923	BRN_KO_340	+	Intergenic	Intergenic
chr1	36698714	36698733	BRN_KO_341	-	Actr1b	UTR3
chr1	36996404	36996425	BRN_KO_342	-	Intergenic	Intergenic
chr1	37403823	37403929	BRN_KO_343	+	Inpp4a	UTR3
chr1	37405075	37405136	BRN_KO_344	+	Inpp4a	Coding_intron
chr1	37407221	37407261	BRN_KO_345	+	Inpp4a	Coding_intron
chr1	37408278	37408344	BRN_KO_346	+	Inpp4a	UTR3
chr1	37408394	37408531	BRN_KO_347	+	Inpp4a	UTR3
chr1	37408908	37409031	BRN_KO_348	+	Inpp4a	UTR3
chr1	37409368	37409481	BRN_KO_349	+	Inpp4a	UTR3
chr1	37410121	37410173	BRN_KO_350	+	Inpp4a	UTR3
chr1	37410473	37410723	BRN_KO_351	+	Inpp4a	UTR3
chr1	37417417	37417610	BRN_KO_352	-	Coa5	UTR3
chr1	37417627	37417806	BRN_KO_353	-	Coa5	UTR3
chr1	37434446	37435120	BRN_KO_354	+	Unc50	Coding_intron
chr1	37435126	37435275	BRN_KO_355	+	Unc50	Coding_intron
chr1	37435279	37435367	BRN_KO_356	+	Unc50	Coding_intron
chr1	37438816	37438989	BRN_KO_357	+	Unc50	UTR3
chr1	37439399	37439475	BRN_KO_358	-	Mgat4a	UTR3
chr1	37439948	37439975	BRN_KO_359	-	Mgat4a	UTR3
chr1	37440154	37440238	BRN_KO_360	-	Mgat4a	UTR3
chr1	37442317	37442440	BRN_KO_361	-	Mgat4a	UTR3
chr1	37443091	37443205	BRN_KO_362	-	Mgat4a	UTR3
chr1	37443688	37443753	BRN_KO_363	-	Mgat4a	UTR3
chr1	37443797	37443848	BRN_KO_364	-	Mgat4a	UTR3
chr1	37443986	37444210	BRN_KO_365	-	Mgat4a	UTR3
chr1	37444235	37444315	BRN_KO_366	-	Mgat4a	UTR3
chr1	37444336	37444425	BRN_KO_367	-	Mgat4a	UTR3
chr1	37444506	37444609	BRN_KO_368	-	Mgat4a	UTR3
chr1	37578341	37578358	BRN_KO_369	+	Intergenic	Intergenic
chr1	38052734	38052809	BRN_KO_370	+	Eif5b	UTR3
chr1	38052811	38052997	BRN_KO_371	+	Eif5b	UTR3
chr1	38071020	38071062	BRN_KO_372	+	Intergenic	Intergenic
chr1	38378153	38378242	BRN_KO_373	-	Aff3	Coding_intron
chr1	38378277	38378382	BRN_KO_374	-	Aff3	Coding_intron
chr1	38397913	38397935	BRN_KO_375	+	Intergenic	Intergenic
chr1	38497386	38497439	BRN_KO_376	-	Aff3	Coding_intron
chr1	38627230	38627246	BRN_KO_377	+	Intergenic	Intergenic
chr1	38730842	38730859	BRN_KO_378	+	Intergenic	Intergenic
chr1	38732764	38732781	BRN_KO_379	-	Intergenic	Intergenic
chr1	38793683	38793792	BRN_KO_380	-	Lonrf2	UTR3
chr1	38793878	38794133	BRN_KO_381	-	Lonrf2	UTR3
chr1	38796578	38796651	BRN_KO_382	-	Lonrf2	UTR3
chr1	38797315	38797538	BRN_KO_383	-	Lonrf2	UTR3
chr1	38916548	38916605	BRN_KO_384	+	Intergenic	Intergenic
chr1	38916623	38916650	BRN_KO_385	+	Intergenic	Intergenic
chr1	39363006	39363113	BRN_KO_386	+	Npas2	UTR3
chr1	39533322	39533377	BRN_KO_387	-	Intergenic	Intergenic
chr1	39622371	39622433	BRN_KO_388	-	Creg2	UTR3
chr1	39803430	39803473	BRN_KO_389	-	Intergenic	Intergenic
chr1	39862791	39862805	BRN_KO_390	-	Intergenic	Intergenic
chr1	39901388	39901408	BRN_KO_391	-	Intergenic	Intergenic
chr1	40141880	40141900	BRN_KO_392	-	Intergenic	Intergenic
chr1	40215717	40215747	BRN_KO_393	-	Intergenic	Intergenic
chr1	40440647	40440661	BRN_KO_394	-	Intergenic	Intergenic
chr1	40590704	40590718	BRN_KO_395	-	Intergenic	Intergenic
chr1	42696652	42696740	BRN_KO_396	+	Pou3f3	UTR5
chr1	42696780	42696913	BRN_KO_397	+	Pou3f3	UTR5
chr1	42699538	42699564	BRN_KO_398	+	Pou3f3	UTR3
chr1	42699738	42699781	BRN_KO_399	+	Pou3f3	UTR3
chr1	42700005	42700068	BRN_KO_400	+	Pou3f3	UTR3
chr1	42700497	42700578	BRN_KO_401	+	Pou3f3	UTR3
chr1	42702196	42702248	BRN_KO_402	+	Pou3f3	UTR3
chr1	42702555	42702638	BRN_KO_403	+	Pou3f3	UTR3
chr1	42741005	42741024	BRN_KO_404	+	Gm20646	Noncoding_intron
chr1	43114142	43114169	BRN_KO_405	+	AI597479	UTR3
chr1	43114234	43114295	BRN_KO_406	+	AI597479	UTR3
chr1	43114301	43114408	BRN_KO_407	+	AI597479	UTR3
chr1	43114443	43114488	BRN_KO_408	+	AI597479	UTR3
chr1	43114603	43114638	BRN_KO_409	+	AI597479	UTR3
chr1	43114698	43114753	BRN_KO_410	+	AI597479	UTR3
chr1	43115670	43115754	BRN_KO_411	+	AI597479	UTR3
chr1	43115810	43115937	BRN_KO_412	+	AI597479	UTR3
chr1	43140720	43140751	BRN_KO_413	+	Intergenic	Intergenic
chr1	43420868	43420899	BRN_KO_414	-	Intergenic	Intergenic
chr1	43569877	43569915	BRN_KO_415	+	Nck2	UTR3
chr1	43772162	43772315	BRN_KO_416	-	Uxs1	Coding_intron
chr1	43888714	43888855	BRN_KO_417	+	Intergenic	Intergenic
chr1	43888864	43888924	BRN_KO_418	+	Intergenic	Intergenic
chr1	43889181	43889227	BRN_KO_419	+	Intergenic	Intergenic
chr1	43889304	43889376	BRN_KO_420	+	Intergenic	Intergenic
chr1	43889420	43889490	BRN_KO_421	+	Intergenic	Intergenic
chr1	43889586	43889728	BRN_KO_422	+	Intergenic	Intergenic
chr1	43931482	43931548	BRN_KO_423	+	Intergenic	Intergenic
chr1	44201261	44201318	BRN_KO_424	-	Intergenic	Intergenic
chr1	44460983	44461107	BRN_KO_425	-	Intergenic	Intergenic
chr1	44461263	44461398	BRN_KO_426	-	Intergenic	Intergenic
chr1	44546605	44546664	BRN_KO_427	-	Intergenic	Intergenic
chr1	44568056	44568084	BRN_KO_428	+	Gulp1	Coding_intron
chr1	44872839	44872871	BRN_KO_429	-	Intergenic	Intergenic
chr1	45384435	45384448	BRN_KO_430	-	Col5a2	Coding_cdsexon
chr1	45512440	45512469	BRN_KO_431	-	Intergenic	Intergenic
chr1	45913577	45913622	BRN_KO_432	-	Slc40a1	Coding_intron
chr1	45925580	45925592	BRN_KO_433	-	Slc40a1	Coding_intron
chr1	46373789	46373842	BRN_KO_434	-	Intergenic	Intergenic
chr1	46732593	46732626	BRN_KO_435	+	Dnah7c	Coding_intron
chr1	46807557	46807657	BRN_KO_436	-	Slc39a10	UTR3
chr1	46807687	46807861	BRN_KO_437	-	Slc39a10	UTR3
chr1	46807898	46808162	BRN_KO_438	-	Slc39a10	UTR3
chr1	46808666	46808865	BRN_KO_439	-	Slc39a10	UTR3
chr1	46808922	46809078	BRN_KO_440	-	Slc39a10	UTR3
chr1	46809149	46809475	BRN_KO_441	-	Slc39a10	UTR3
chr1	46809506	46809570	BRN_KO_442	-	Slc39a10	UTR3
chr1	46809620	46809816	BRN_KO_443	-	Slc39a10	UTR3
chr1	46809847	46809959	BRN_KO_444	-	Slc39a10	UTR3
chr1	47394953	47395042	BRN_KO_445	-	Intergenic	Intergenic
chr1	48276487	48276504	BRN_KO_446	-	Intergenic	Intergenic
chr1	48625378	48625440	BRN_KO_447	-	Intergenic	Intergenic
chr1	49555599	49555624	BRN_KO_448	-	Intergenic	Intergenic
chr1	49830618	49830702	BRN_KO_449	-	Intergenic	Intergenic
chr1	50076277	50076312	BRN_KO_450	+	Intergenic	Intergenic
chr1	51022369	51022502	BRN_KO_451	+	Tmeff2	Coding_intron
chr1	51095362	51095506	BRN_KO_452	+	Tmeff2	Coding_intron
chr1	51185649	51185712	BRN_KO_453	+	Tmeff2	UTR3
chr1	51783076	51783177	BRN_KO_454	-	Myo1b	Coding_intron
chr1	52113965	52113977	BRN_KO_455	+	Gm28177	Noncoding_exon
chr1	52163460	52163525	BRN_KO_456	-	Gls	UTR3
chr1	52163637	52164008	BRN_KO_457	-	Gls	UTR3
chr1	52164412	52164526	BRN_KO_458	-	Gls	UTR3
chr1	52165426	52165588	BRN_KO_459	-	Gls	UTR3
chr1	52165698	52166102	BRN_KO_460	-	Gls	UTR3
chr1	52178674	52178847	BRN_KO_461	-	Gls	Coding_intron
chr1	52184366	52184438	BRN_KO_462	-	Gls	UTR3
chr1	52212644	52212703	BRN_KO_463	-	Gls	Coding_intron
chr1	52458762	52458870	BRN_KO_464	-	Nab1	UTR3
chr1	52638039	52638078	BRN_KO_465	+	Tmem194b	Coding_intron
chr1	52657651	52657755	BRN_KO_466	-	Mfsd6	UTR3
chr1	52660901	52660949	BRN_KO_467	-	Mfsd6	Coding_cdsexon
chr1	52727416	52727434	BRN_KO_468	-	Mfsd6	UTR5
chr1	52788837	52788995	BRN_KO_469	-	Inpp1	UTR3
chr1	52887144	52887193	BRN_KO_470	-	Intergenic	Intergenic
chr1	53392592	53392653	BRN_KO_471	+	Intergenic	Intergenic
chr1	53393095	53393161	BRN_KO_472	+	Intergenic	Intergenic
chr1	53393217	53393287	BRN_KO_473	+	Intergenic	Intergenic
chr1	53393696	53393780	BRN_KO_474	+	Intergenic	Intergenic
chr1	53393787	53393820	BRN_KO_475	+	Intergenic	Intergenic
chr1	53396410	53396483	BRN_KO_476	+	Intergenic	Intergenic
chr1	53396668	53396752	BRN_KO_477	+	Intergenic	Intergenic
chr1	53396827	53396911	BRN_KO_478	+	Intergenic	Intergenic
chr1	53560830	53560872	BRN_KO_479	-	Dnah7a	Coding_intron
chr1	53811912	53811993	BRN_KO_480	-	Hecw2	UTR3
chr1	53812555	53812625	BRN_KO_481	-	Hecw2	UTR3
chr1	53812702	53812738	BRN_KO_482	-	Hecw2	UTR3
chr1	53862109	53862213	BRN_KO_483	-	Hecw2	Coding_intron
chr1	53863492	53863555	BRN_KO_484	-	Hecw2	Coding_intron
chr1	53904016	53904110	BRN_KO_485	-	Hecw2	Coding_intron
chr1	54098859	54099283	BRN_KO_486	-	Hecw2	Coding_intron
chr1	54250779	54250801	BRN_KO_487	+	Ccdc150	UTR5
chr1	54476160	54476188	BRN_KO_488	-	Pgap1	UTR3
chr1	54478097	54478173	BRN_KO_489	-	Pgap1	UTR3
chr1	54478268	54478324	BRN_KO_490	-	Pgap1	UTR3
chr1	54557369	54557385	BRN_KO_491	-	Pgap1	Coding_intron
chr1	54927832	54927861	BRN_KO_492	-	Intergenic	Intergenic
chr1	54986775	54986921	BRN_KO_493	-	Sf3b1	UTR3
chr1	54987219	54987289	BRN_KO_494	-	Sf3b1	UTR3
chr1	54987292	54987327	BRN_KO_495	-	Sf3b1	UTR3
chr1	55072180	55072250	BRN_KO_496	+	Coq10b	UTR3
chr1	55072289	55072458	BRN_KO_497	+	Coq10b	UTR3
chr1	55077855	55077944	BRN_KO_498	-	Hspd1	UTR3
chr1	55152801	55153099	BRN_KO_499	+	Mob4	UTR3
chr1	55153685	55153738	BRN_KO_500	+	Mob4	UTR3
chr1	55153746	55154004	BRN_KO_501	+	Mob4	UTR3
chr1	55245431	55245627	BRN_KO_502	+	Mars2	UTR3
chr1	55245732	55245869	BRN_KO_503	+	Mars2	UTR3
chr1	55246318	55246359	BRN_KO_504	+	Mars2	UTR3
chr1	55458136	55458152	BRN_KO_505	-	Intergenic	Intergenic
chr1	55574057	55574159	BRN_KO_506	+	Plcl1	Coding_intron
chr1	55574163	55574203	BRN_KO_507	+	Plcl1	Coding_intron
chr1	55751549	55751679	BRN_KO_508	+	Plcl1	UTR3
chr1	55751789	55751849	BRN_KO_509	+	Plcl1	UTR3
chr1	55751946	55752062	BRN_KO_510	+	Plcl1	UTR3
chr1	55752228	55752291	BRN_KO_511	+	Plcl1	UTR3
chr1	55752813	55752844	BRN_KO_512	+	Plcl1	UTR3
chr1	56191632	56191664	BRN_KO_513	+	Intergenic	Intergenic
chr1	56794788	56794850	BRN_KO_514	-	Satb2	UTR3
chr1	56796385	56796438	BRN_KO_515	-	Satb2	UTR3
chr1	56796790	56796807	BRN_KO_516	+	Intergenic	Intergenic
chr1	57074968	57074987	BRN_KO_517	-	Intergenic	Intergenic
chr1	57091602	57091641	BRN_KO_518	+	Intergenic	Intergenic
chr1	57345140	57345153	BRN_KO_519	+	Intergenic	Intergenic
chr1	57385297	57385347	BRN_KO_520	+	1700066M21Rik	UTR3
chr1	57608217	57608231	BRN_KO_521	+	Intergenic	Intergenic
chr1	57692167	57692221	BRN_KO_522	-	Intergenic	Intergenic
chr1	58392335	58392379	BRN_KO_523	+	Intergenic	Intergenic
chr1	58393489	58393501	BRN_KO_524	-	Intergenic	Intergenic
chr1	58406321	58406438	BRN_KO_525	+	Bzw1	UTR3
chr1	58463417	58463476	BRN_KO_526	-	Orc2	UTR3
chr1	58522848	58523329	BRN_KO_527	-	Fam126b	UTR3
chr1	58523361	58523438	BRN_KO_528	-	Fam126b	UTR3
chr1	58523965	58524073	BRN_KO_529	-	Fam126b	UTR3
chr1	58524076	58524161	BRN_KO_530	-	Fam126b	UTR3
chr1	58524345	58524429	BRN_KO_531	-	Fam126b	UTR3
chr1	58525528	58525817	BRN_KO_532	-	Fam126b	UTR3
chr1	58526653	58526801	BRN_KO_533	-	Fam126b	UTR3
chr1	58526870	58526968	BRN_KO_534	-	Fam126b	UTR3
chr1	58527044	58527096	BRN_KO_535	-	Fam126b	UTR3
chr1	58527121	58527213	BRN_KO_536	-	Fam126b	UTR3
chr1	58527382	58527514	BRN_KO_537	-	Fam126b	UTR3
chr1	58527704	58527785	BRN_KO_538	-	Fam126b	UTR3
chr1	58527798	58527954	BRN_KO_539	-	Fam126b	UTR3
chr1	58528041	58528151	BRN_KO_540	-	Fam126b	UTR3
chr1	58529327	58529493	BRN_KO_541	-	Fam126b	UTR3
chr1	58529513	58529672	BRN_KO_542	-	Fam126b	UTR3
chr1	58529888	58529934	BRN_KO_543	-	Fam126b	Coding_cdsexon
chr1	58533118	58533211	BRN_KO_544	-	Fam126b	Coding_intron
chr1	58647690	58647751	BRN_KO_545	+	Intergenic	Intergenic
chr1	58647844	58647968	BRN_KO_546	+	Intergenic	Intergenic
chr1	58648089	58648308	BRN_KO_547	+	Intergenic	Intergenic
chr1	58754199	58754275	BRN_KO_548	+	Cflar	UTR3
chr1	58754413	58754453	BRN_KO_549	+	Cflar	UTR3
chr1	58754499	58754584	BRN_KO_550	+	Cflar	UTR3
chr1	58755069	58755146	BRN_KO_551	+	Cflar	UTR3
chr1	58755388	58755431	BRN_KO_552	+	Cflar	UTR3
chr1	58756715	58756792	BRN_KO_553	+	Cflar	UTR3
chr1	58757382	58757445	BRN_KO_554	+	Cflar	UTR3
chr1	58757501	58757611	BRN_KO_555	+	Cflar	UTR3
chr1	58757695	58757754	BRN_KO_556	+	Cflar	UTR3
chr1	58757891	58757937	BRN_KO_557	+	Cflar	UTR3
chr1	58758309	58758401	BRN_KO_558	+	Cflar	UTR3
chr1	58758789	58758848	BRN_KO_559	+	Cflar	UTR3
chr1	58900681	58900780	BRN_KO_560	-	Trak2	UTR3
chr1	58900820	58900927	BRN_KO_561	-	Trak2	UTR3
chr1	58901156	58901215	BRN_KO_562	-	Trak2	UTR3
chr1	58901799	58901851	BRN_KO_563	-	Trak2	UTR3
chr1	58902332	58902453	BRN_KO_564	-	Trak2	UTR3
chr1	58902586	58902964	BRN_KO_565	-	Trak2	UTR3
chr1	58903297	58903499	BRN_KO_566	-	Trak2	UTR3
chr1	59486760	59486856	BRN_KO_567	+	Fzd7	UTR3
chr1	59506610	59506629	BRN_KO_568	+	Intergenic	Intergenic
chr1	59763595	59763620	BRN_KO_569	+	Bmpr2	UTR5
chr1	59790976	59791014	BRN_KO_570	+	Bmpr2	Coding_intron
chr1	59870644	59870805	BRN_KO_571	+	Bmpr2	UTR3
chr1	59870894	59871025	BRN_KO_572	+	Bmpr2	UTR3
chr1	59875861	59875917	BRN_KO_573	+	Bmpr2	UTR3
chr1	59876322	59876395	BRN_KO_574	+	Bmpr2	UTR3
chr1	59876457	59876519	BRN_KO_575	+	Bmpr2	UTR3
chr1	59876696	59876803	BRN_KO_576	+	Bmpr2	UTR3
chr1	59876883	59877073	BRN_KO_577	+	Bmpr2	UTR3
chr1	59877223	59877413	BRN_KO_578	+	Bmpr2	UTR3
chr1	59877448	59877607	BRN_KO_579	+	Bmpr2	UTR3
chr1	59982392	59982452	BRN_KO_580	+	Fam117b	UTR3
chr1	59982585	59982778	BRN_KO_581	+	Fam117b	UTR3
chr1	59985200	59985277	BRN_KO_582	+	Fam117b	UTR3
chr1	60151451	60151547	BRN_KO_583	+	Carf	UTR3
chr1	60151754	60151864	BRN_KO_584	+	Carf	UTR3
chr1	60152057	60152121	BRN_KO_585	+	Carf	UTR3
chr1	60153164	60153233	BRN_KO_586	+	Carf	UTR3
chr1	60153284	60153436	BRN_KO_587	+	Carf	UTR3
chr1	60153523	60153562	BRN_KO_588	+	Carf	UTR3
chr1	60153761	60153950	BRN_KO_589	+	Carf	UTR3
chr1	60331470	60331562	BRN_KO_590	+	Nbeal1	UTR3
chr1	60331566	60331682	BRN_KO_591	+	Nbeal1	UTR3
chr1	60331825	60331898	BRN_KO_592	+	Nbeal1	UTR3
chr1	60332222	60332338	BRN_KO_593	+	Nbeal1	UTR3
chr1	60332565	60332608	BRN_KO_594	+	Nbeal1	UTR3
chr1	60336911	60336984	BRN_KO_595	+	Nbeal1	UTR3
chr1	60337032	60337080	BRN_KO_596	+	Nbeal1	UTR3
chr1	60337963	60338069	BRN_KO_597	+	Nbeal1	UTR3
chr1	60338101	60338303	BRN_KO_598	+	Nbeal1	UTR3
chr1	60477339	60477483	BRN_KO_599	+	Abi2	UTR3
chr1	60477495	60477568	BRN_KO_600	+	Abi2	UTR3
chr1	60477580	60477652	BRN_KO_601	+	Abi2	UTR3
chr1	60478681	60478744	BRN_KO_602	+	Abi2	UTR3
chr1	60478884	60478934	BRN_KO_603	+	Abi2	UTR3
chr1	60479284	60479419	BRN_KO_604	+	Abi2	UTR3
chr1	60479574	60479752	BRN_KO_605	+	Abi2	UTR3
chr1	60479821	60480026	BRN_KO_606	+	Abi2	UTR3
chr1	60480172	60480217	BRN_KO_607	+	Abi2	UTR3
chr1	60480249	60480454	BRN_KO_608	+	Abi2	UTR3
chr1	60483633	60483785	BRN_KO_609	-	Raph1	UTR3
chr1	60483836	60483904	BRN_KO_610	-	Raph1	UTR3
chr1	60483929	60484069	BRN_KO_611	-	Raph1	UTR3
chr1	60484085	60484210	BRN_KO_612	-	Raph1	UTR3
chr1	60487306	60487356	BRN_KO_613	-	Raph1	UTR3
chr1	60487365	60487453	BRN_KO_614	-	Raph1	UTR3
chr1	60487777	60487836	BRN_KO_615	-	Raph1	UTR3
chr1	60487964	60488194	BRN_KO_616	-	Raph1	UTR3
chr1	60925076	60925092	BRN_KO_617	+	Intergenic	Intergenic
chr1	61680335	61680349	BRN_KO_618	-	Intergenic	Intergenic
chr1	62530783	62530800	BRN_KO_619	-	Intergenic	Intergenic
chr1	62571438	62571475	BRN_KO_620	+	Pard3b	Coding_intron
chr1	62814522	62814599	BRN_KO_621	-	Intergenic	Intergenic
chr1	63047798	63047993	BRN_KO_622	-	Ino80d	UTR3
chr1	63048285	63048351	BRN_KO_623	-	Ino80d	UTR3
chr1	63048940	63049027	BRN_KO_624	-	Ino80d	UTR3
chr1	63049161	63049284	BRN_KO_625	-	Ino80d	UTR3
chr1	63049331	63049498	BRN_KO_626	-	Ino80d	UTR3
chr1	63049554	63049715	BRN_KO_627	-	Ino80d	UTR3
chr1	63050255	63050304	BRN_KO_628	-	Ino80d	UTR3
chr1	63050591	63050718	BRN_KO_629	-	Ino80d	UTR3
chr1	63050804	63050883	BRN_KO_630	-	Ino80d	UTR3
chr1	63051427	63051653	BRN_KO_631	-	Ino80d	UTR3
chr1	63051703	63051785	BRN_KO_632	-	Ino80d	UTR3
chr1	63051861	63051965	BRN_KO_633	-	Ino80d	UTR3
chr1	63053060	63053083	BRN_KO_634	-	Ino80d	UTR3
chr1	63057347	63057401	BRN_KO_635	-	Ino80d	UTR3
chr1	63057575	63057618	BRN_KO_636	-	Ino80d	UTR3
chr1	63057841	63057926	BRN_KO_637	-	Ino80d	UTR3
chr1	63058575	63058642	BRN_KO_638	-	Ino80d	Coding_cdsexon
chr1	63085855	63085920	BRN_KO_639	-	Ino80d	Coding_cdsexon
chr1	63277127	63277142	BRN_KO_640	-	Intergenic	Intergenic
chr1	63323581	63323613	BRN_KO_641	-	Intergenic	Intergenic
chr1	63323655	63323683	BRN_KO_642	-	Intergenic	Intergenic
chr1	63324127	63324148	BRN_KO_643	-	Intergenic	Intergenic
chr1	63326009	63326029	BRN_KO_644	-	Intergenic	Intergenic
chr1	63482414	63482492	BRN_KO_645	+	Adam23	Coding_intron
chr1	63517250	63517471	BRN_KO_646	+	Adam23	Coding_intron
chr1	63517474	63517554	BRN_KO_647	+	Adam23	Coding_intron
chr1	63593515	63593675	BRN_KO_648	+	Adam23	UTR3
chr1	63593688	63593862	BRN_KO_649	+	Adam23	UTR3
chr1	63594248	63594345	BRN_KO_650	+	Adam23	UTR3
chr1	63875571	63875607	BRN_KO_651	+	Intergenic	Intergenic
chr1	64029463	64029697	BRN_KO_652	-	Klf7	UTR3
chr1	64029794	64029820	BRN_KO_653	-	Klf7	UTR3
chr1	64030169	64030247	BRN_KO_654	-	Klf7	UTR3
chr1	64103223	64103285	BRN_KO_655	-	Klf7	Coding_intron
chr1	64134032	64134096	BRN_KO_656	-	Intergenic	Intergenic
chr1	64325707	64325751	BRN_KO_657	+	Intergenic	Intergenic
chr1	64597531	64597636	BRN_KO_658	+	Creb1	UTR3
chr1	64599716	64599886	BRN_KO_659	+	Creb1	UTR3
chr1	64599918	64599997	BRN_KO_660	+	Creb1	UTR3
chr1	64600035	64600213	BRN_KO_661	+	Creb1	UTR3
chr1	64600306	64600414	BRN_KO_662	+	Creb1	UTR3
chr1	64601216	64601520	BRN_KO_663	+	Creb1	UTR3
chr1	64601824	64601899	BRN_KO_664	+	Creb1	UTR3
chr1	64602245	64602547	BRN_KO_665	+	Creb1	UTR3
chr1	64602710	64602959	BRN_KO_666	+	Creb1	UTR3
chr1	64639169	64639205	BRN_KO_667	-	Intergenic	Intergenic
chr1	64716038	64716077	BRN_KO_668	+	Ccnyl1	Coding_intron
chr1	64806038	64806125	BRN_KO_669	-	Plekhm3	Coding_intron
chr1	65186892	65186909	BRN_KO_670	-	Intergenic	Intergenic
chr1	65274254	65274278	BRN_KO_671	+	Pikfyve	UTR3
chr1	65274309	65274356	BRN_KO_672	+	Pikfyve	UTR3
chr1	65274395	65274468	BRN_KO_673	+	Pikfyve	UTR3
chr1	65274535	65274580	BRN_KO_674	+	Pikfyve	UTR3
chr1	65274731	65274794	BRN_KO_675	+	Pikfyve	UTR3
chr1	65274963	65275131	BRN_KO_676	+	Pikfyve	UTR3
chr1	65275796	65275925	BRN_KO_677	+	Pikfyve	UTR3
chr1	65276179	65276216	BRN_KO_678	+	Pikfyve	UTR3
chr1	65276253	65276292	BRN_KO_679	+	Pikfyve	UTR3
chr1	65276302	65276352	BRN_KO_680	+	Pikfyve	UTR3
chr1	65276450	65276511	BRN_KO_681	+	Pikfyve	UTR3
chr1	65276539	65276784	BRN_KO_682	+	Pikfyve	UTR3
chr1	65438104	65438142	BRN_KO_683	-	Intergenic	Intergenic
chr1	65988059	65988128	BRN_KO_684	+	Intergenic	Intergenic
chr1	66179398	66179466	BRN_KO_685	-	Intergenic	Intergenic
chr1	66358273	66358471	BRN_KO_686	+	Map2	Coding_intron
chr1	66433513	66433559	BRN_KO_687	+	Map2	Coding_cdsexon
chr1	66438979	66439610	BRN_KO_688	+	Map2	UTR3
chr1	66439697	66440393	BRN_KO_689	+	Map2	UTR3
chr1	66442243	66442584	BRN_KO_690	+	Map2	UTR3
chr1	66600971	66601006	BRN_KO_691	+	Unc80	Coding_intron
chr1	66631988	66632026	BRN_KO_692	-	Intergenic	Intergenic
chr1	66637968	66638028	BRN_KO_693	+	Unc80	Coding_cdsexon
chr1	66646384	66646470	BRN_KO_694	+	Unc80	Coding_cdsexon
chr1	66695775	66696056	BRN_KO_695	+	Unc80	UTR3
chr1	66696319	66696390	BRN_KO_696	+	Unc80	UTR3
chr1	66696434	66696764	BRN_KO_697	+	Unc80	UTR3
chr1	66696800	66697192	BRN_KO_698	+	Unc80	UTR3
chr1	66697214	66697485	BRN_KO_699	+	Unc80	UTR3
chr1	66697524	66697595	BRN_KO_700	+	Unc80	UTR3
chr1	66697746	66697826	BRN_KO_701	+	Unc80	UTR3
chr1	66718096	66718137	BRN_KO_702	+	Rpe	UTR3
chr1	66729263	66729335	BRN_KO_703	+	Intergenic	Intergenic
chr1	66757532	66757867	BRN_KO_704	+	Intergenic	Intergenic
chr1	66830869	66830942	BRN_KO_705	-	Acadl	UTR3
chr1	67168089	67168140	BRN_KO_706	+	Cps1	Coding_intron
chr1	67345103	67345120	BRN_KO_707	-	Intergenic	Intergenic
chr1	68032379	68032877	BRN_KO_708	-	Erbb4	UTR3
chr1	68032891	68032987	BRN_KO_709	-	Erbb4	UTR3
chr1	68033063	68033115	BRN_KO_710	-	Erbb4	UTR3
chr1	68033118	68033157	BRN_KO_711	-	Erbb4	UTR3
chr1	68033301	68033519	BRN_KO_712	-	Erbb4	UTR3
chr1	68033575	68033635	BRN_KO_713	-	Erbb4	UTR3
chr1	68033656	68033694	BRN_KO_714	-	Erbb4	UTR3
chr1	68033716	68033921	BRN_KO_715	-	Erbb4	UTR3
chr1	68033954	68034022	BRN_KO_716	-	Erbb4	UTR3
chr1	68034032	68034208	BRN_KO_717	-	Erbb4	UTR3
chr1	68034221	68034387	BRN_KO_718	-	Erbb4	UTR3
chr1	68035349	68035441	BRN_KO_719	-	Erbb4	UTR3
chr1	68035652	68035869	BRN_KO_720	-	Erbb4	UTR3
chr1	68035959	68036052	BRN_KO_721	-	Erbb4	UTR3
chr1	68036804	68036864	BRN_KO_722	-	Erbb4	UTR3
chr1	68038016	68038064	BRN_KO_723	-	Erbb4	UTR3
chr1	68039315	68039383	BRN_KO_724	-	Erbb4	UTR3
chr1	68189484	68189547	BRN_KO_725	-	Erbb4	Coding_intron
chr1	68476029	68476106	BRN_KO_726	-	Erbb4	Coding_intron
chr1	68732247	68732333	BRN_KO_727	-	Erbb4	Coding_intron
chr1	68942094	68942190	BRN_KO_728	-	Erbb4	Coding_intron
chr1	68947693	68947812	BRN_KO_729	-	Erbb4	Coding_intron
chr1	68951787	68951825	BRN_KO_730	-	Erbb4	Coding_intron
chr1	69031852	69031998	BRN_KO_731	-	Erbb4	Coding_intron
chr1	69456797	69456868	BRN_KO_732	+	Intergenic	Intergenic
chr1	69541216	69541254	BRN_KO_733	+	Gm29114	Noncoding_intron
chr1	69669041	69669101	BRN_KO_734	-	Ikzf2	Coding_intron
chr1	71694882	71694943	BRN_KO_735	+	Intergenic	Intergenic
chr1	71944388	71944476	BRN_KO_736	-	Intergenic	Intergenic
chr1	72212135	72212152	BRN_KO_737	-	Mreg	UTR5
chr1	72226239	72226324	BRN_KO_738	+	Gm25360	Noncoding_exon
chr1	72886560	72886608	BRN_KO_739	-	Intergenic	Intergenic
chr1	73459816	73459829	BRN_KO_740	-	Intergenic	Intergenic
chr1	73580612	73580625	BRN_KO_741	-	Intergenic	Intergenic
chr1	73853567	73853596	BRN_KO_742	+	Intergenic	Intergenic
chr1	73910272	73910463	BRN_KO_743	-	Tns1	UTR3
chr1	73910470	73910575	BRN_KO_744	-	Tns1	UTR3
chr1	73911943	73912047	BRN_KO_745	-	Tns1	UTR3
chr1	73913391	73913450	BRN_KO_746	-	Tns1	UTR3
chr1	73913713	73913760	BRN_KO_747	-	Tns1	UTR3
chr1	73948670	73948722	BRN_KO_748	-	Tns1	Coding_intron
chr1	74156574	74156590	BRN_KO_749	+	Cxcr2	Coding_intron
chr1	74181192	74181253	BRN_KO_750	+	Intergenic	Intergenic
chr1	74279850	74279913	BRN_KO_751	-	Aamp	UTR3
chr1	74310714	74310796	BRN_KO_752	+	Pnkd	Coding_intron
chr1	74353436	74353671	BRN_KO_753	+	Pnkd	UTR3
chr1	74396222	74396489	BRN_KO_754	+	Ctdsp1	UTR3
chr1	74436286	74436325	BRN_KO_755	-	Usp37	UTR3
chr1	74436607	74436709	BRN_KO_756	-	Usp37	UTR3
chr1	74438847	74438901	BRN_KO_757	-	Usp37	UTR3
chr1	74788834	74788852	BRN_KO_758	+	Intergenic	Intergenic
chr1	74816765	74816819	BRN_KO_759	-	Intergenic	Intergenic
chr1	74854982	74855072	BRN_KO_760	+	Cdk5r2	UTR5
chr1	75147365	75147476	BRN_KO_761	+	Fam134a	UTR3
chr1	75152093	75152207	BRN_KO_762	+	Intergenic	Intergenic
chr1	75152225	75152278	BRN_KO_763	+	Intergenic	Intergenic
chr1	75214992	75215064	BRN_KO_764	-	Tuba4a	UTR3
chr1	75473892	75474075	BRN_KO_765	+	Asic4	UTR3
chr1	75474117	75474172	BRN_KO_766	+	Asic4	UTR3
chr1	75474225	75474269	BRN_KO_767	+	Asic4	UTR3
chr1	75513704	75513768	BRN_KO_768	+	Intergenic	Intergenic
chr1	77367233	77367348	BRN_KO_769	-	Epha4	UTR3
chr1	77368970	77369149	BRN_KO_770	-	Epha4	UTR3
chr1	77369291	77369348	BRN_KO_771	-	Epha4	UTR3
chr1	77369570	77369605	BRN_KO_772	-	Epha4	UTR3
chr1	77372912	77372990	BRN_KO_773	-	Epha4	UTR3
chr1	77373430	77373495	BRN_KO_774	-	Epha4	UTR3
chr1	77440303	77440319	BRN_KO_775	+	Intergenic	Intergenic
chr1	77468311	77468491	BRN_KO_776	-	Epha4	Coding_intron
chr1	77468493	77468573	BRN_KO_777	-	Epha4	Coding_intron
chr1	77514511	77514571	BRN_KO_778	-	Epha4	Coding_intron
chr1	77603477	77603566	BRN_KO_779	-	Intergenic	Intergenic
chr1	77756606	77756643	BRN_KO_780	+	Intergenic	Intergenic
chr1	77763344	77763414	BRN_KO_781	-	Intergenic	Intergenic
chr1	78664885	78664900	BRN_KO_782	+	Utp14b	Coding_cdsexon
chr1	78665399	78665416	BRN_KO_783	+	Utp14b	Coding_cdsexon
chr1	78685508	78685583	BRN_KO_784	+	Acsl3	Coding_intron
chr1	78706420	78706636	BRN_KO_785	+	Acsl3	UTR3
chr1	78706672	78706981	BRN_KO_786	+	Acsl3	UTR3
chr1	78782705	78782813	BRN_KO_787	-	Intergenic	Intergenic
chr1	79434756	79434799	BRN_KO_788	-	Scg2	UTR3
chr1	79608640	79608669	BRN_KO_789	-	Ap1s3	UTR3
chr1	79608672	79608743	BRN_KO_790	-	Ap1s3	UTR3
chr1	79781344	79781420	BRN_KO_791	+	Mrpl44	UTR3
chr1	80142477	80142531	BRN_KO_792	-	Intergenic	Intergenic
chr1	80265131	80265351	BRN_KO_793	-	Cul3	UTR3
chr1	80265764	80265982	BRN_KO_794	-	Cul3	UTR3
chr1	80266140	80266414	BRN_KO_795	-	Cul3	UTR3
chr1	80266426	80266543	BRN_KO_796	-	Cul3	UTR3
chr1	80266570	80266822	BRN_KO_797	-	Cul3	UTR3
chr1	80267003	80267198	BRN_KO_798	-	Cul3	UTR3
chr1	80316162	80316194	BRN_KO_799	-	Cul3	Coding_intron
chr1	80501091	80501256	BRN_KO_800	-	Dock10	UTR3
chr1	80501277	80501358	BRN_KO_801	-	Dock10	UTR3
chr1	80501413	80501444	BRN_KO_802	-	Dock10	UTR3
chr1	80501476	80501606	BRN_KO_803	-	Dock10	UTR3
chr1	80548057	80548181	BRN_KO_804	-	Dock10	Coding_intron
chr1	80567628	80567691	BRN_KO_805	-	Dock10	Coding_intron
chr1	80570511	80570623	BRN_KO_806	-	Dock10	Coding_intron
chr1	80649286	80649312	BRN_KO_807	+	Intergenic	Intergenic
chr1	80715189	80715290	BRN_KO_808	-	Dock10	Coding_intron
chr1	81154947	81154996	BRN_KO_809	-	Intergenic	Intergenic
chr1	81336915	81337004	BRN_KO_810	+	Nyap2	UTR3
chr1	81337066	81337180	BRN_KO_811	+	Nyap2	UTR3
chr1	81337195	81337218	BRN_KO_812	+	Nyap2	UTR3
chr1	81337576	81337652	BRN_KO_813	+	Nyap2	UTR3
chr1	81338421	81338487	BRN_KO_814	+	Nyap2	UTR3
chr1	81339030	81339058	BRN_KO_815	+	Nyap2	UTR3
chr1	81340435	81340504	BRN_KO_816	+	Nyap2	UTR3
chr1	81340591	81340668	BRN_KO_817	+	Nyap2	UTR3
chr1	81340680	81340732	BRN_KO_818	+	Nyap2	UTR3
chr1	81340992	81341298	BRN_KO_819	+	Nyap2	UTR3
chr1	81341460	81341557	BRN_KO_820	+	Nyap2	UTR3
chr1	81341569	81341769	BRN_KO_821	+	Nyap2	UTR3
chr1	81366095	81366168	BRN_KO_822	+	Intergenic	Intergenic
chr1	81595381	81595394	BRN_KO_823	+	Intergenic	Intergenic
chr1	81611465	81611512	BRN_KO_824	+	Intergenic	Intergenic
chr1	81618053	81618081	BRN_KO_825	-	Intergenic	Intergenic
chr1	81894401	81894414	BRN_KO_826	-	Intergenic	Intergenic
chr1	82032119	82032183	BRN_KO_827	+	Intergenic	Intergenic
chr1	82233114	82233304	BRN_KO_828	-	Irs1	UTR3
chr1	82233347	82233407	BRN_KO_829	-	Irs1	UTR3
chr1	82236470	82236527	BRN_KO_830	-	Irs1	UTR3
chr1	82236892	82236960	BRN_KO_831	-	Irs1	UTR3
chr1	82237475	82237569	BRN_KO_832	-	Irs1	UTR3
chr1	82483216	82483263	BRN_KO_833	-	Col4a4	Coding_intron
chr1	82751912	82752039	BRN_KO_834	+	Mff	UTR3
chr1	82752094	82752183	BRN_KO_835	+	Mff	UTR3
chr1	82752261	82752358	BRN_KO_836	+	Mff	UTR3
chr1	82786621	82786693	BRN_KO_837	+	Intergenic	Intergenic
chr1	82801178	82801233	BRN_KO_838	+	Intergenic	Intergenic
chr1	82857371	82857679	BRN_KO_839	+	Agfg1	Coding_intron
chr1	82895089	82895233	BRN_KO_840	+	Agfg1	UTR3
chr1	82895322	82895456	BRN_KO_841	+	Agfg1	UTR3
chr1	82895622	82895752	BRN_KO_842	+	Agfg1	UTR3
chr1	82895754	82896019	BRN_KO_843	+	Agfg1	UTR3
chr1	82896401	82896495	BRN_KO_844	+	Agfg1	UTR3
chr1	82899867	82899944	BRN_KO_845	+	Agfg1	UTR3
chr1	82900527	82900581	BRN_KO_846	+	Agfg1	UTR3
chr1	82900582	82900663	BRN_KO_847	+	Agfg1	UTR3
chr1	83103670	83103734	BRN_KO_848	-	Intergenic	Intergenic
chr1	83170974	83171038	BRN_KO_849	-	Intergenic	Intergenic
chr1	83235705	83235750	BRN_KO_850	-	Intergenic	Intergenic
chr1	83390979	83391069	BRN_KO_851	-	Sphkap	Coding_intron
chr1	84189137	84189324	BRN_KO_852	-	Pid1	Coding_intron
chr1	84213384	84213449	BRN_KO_853	-	Pid1	Coding_intron
chr1	84226388	84226480	BRN_KO_854	-	Pid1	Coding_intron
chr1	84277611	84278269	BRN_KO_855	-	Pid1	Coding_intron
chr1	84292470	84292558	BRN_KO_856	-	Pid1	Coding_intron
chr1	84370627	84370690	BRN_KO_857	-	Dner	UTR3
chr1	85012718	85012769	BRN_KO_858	+	Intergenic	Intergenic
chr1	85161351	85161428	BRN_KO_859	-	C130026I21Rik	Coding_intron
chr1	85479123	85479152	BRN_KO_860	+	Intergenic	Intergenic
chr1	85479339	85479382	BRN_KO_861	+	Intergenic	Intergenic
chr1	85555396	85555450	BRN_KO_862	-	Intergenic	Intergenic
chr1	85555515	85555550	BRN_KO_863	-	Intergenic	Intergenic
chr1	85555557	85555596	BRN_KO_864	-	Intergenic	Intergenic
chr1	85691473	85691599	BRN_KO_865	+	Sp100	Coding_intron
chr1	85759087	85759153	BRN_KO_866	-	A630001G21Rik	Coding_intron
chr1	85793703	85793812	BRN_KO_867	+	Cab39	UTR5
chr1	85849353	85849418	BRN_KO_868	+	Cab39	UTR3
chr1	85849502	85849579	BRN_KO_869	+	Cab39	UTR3
chr1	85849737	85850099	BRN_KO_870	+	Cab39	UTR3
chr1	85850302	85850425	BRN_KO_871	+	Cab39	UTR3
chr1	85850557	85850803	BRN_KO_872	+	Cab39	UTR3
chr1	85851442	85851557	BRN_KO_873	+	Cab39	UTR3
chr1	85908044	85908092	BRN_KO_874	+	Itm2c	UTR3
chr1	85908123	85908185	BRN_KO_875	+	Itm2c	UTR3
chr1	85908380	85908430	BRN_KO_876	+	Itm2c	UTR3
chr1	85908464	85908671	BRN_KO_877	+	Itm2c	UTR3
chr1	86142382	86142406	BRN_KO_878	+	Gm21972	Coding_intron
chr1	86526869	86526908	BRN_KO_879	+	Ptma	UTR5
chr1	86529744	86529805	BRN_KO_880	+	Ptma	Coding_cdsexon
chr1	86530075	86530138	BRN_KO_881	+	Ptma	UTR3
chr1	86530301	86530677	BRN_KO_882	+	Ptma	UTR3
chr1	86597315	86597411	BRN_KO_883	+	Cops7b	Coding_intron
chr1	86642397	86642422	BRN_KO_884	-	Intergenic	Intergenic
chr1	86666603	86666623	BRN_KO_885	-	Nppc	UTR3
chr1	86866114	86866193	BRN_KO_886	+	Dis3l2	Coding_intron
chr1	86882623	86882694	BRN_KO_887	+	Dis3l2	Coding_intron
chr1	86959363	86959412	BRN_KO_888	+	Dis3l2	Coding_intron
chr1	87039831	87039896	BRN_KO_889	+	Dis3l2	Coding_intron
chr1	87355631	87355695	BRN_KO_890	+	Gigyf2	Coding_intron
chr1	87356210	87356244	BRN_KO_891	+	Gigyf2	Coding_intron
chr1	87383365	87383390	BRN_KO_892	-	Intergenic	Intergenic
chr1	87450593	87450645	BRN_KO_893	+	Gigyf2	UTR3
chr1	87542962	87543009	BRN_KO_894	-	Ngef	Coding_intron
chr1	87543162	87543249	BRN_KO_895	-	Ngef	Coding_intron
chr1	87543315	87543380	BRN_KO_896	-	Ngef	Coding_intron
chr1	87731175	87731222	BRN_KO_897	-	Intergenic	Intergenic
chr1	87866595	87866614	BRN_KO_898	+	Dgkd	Coding_intron
chr1	87943101	87943180	BRN_KO_899	+	Dgkd	UTR3
chr1	87944375	87944474	BRN_KO_900	+	Dgkd	UTR3
chr1	88022292	88022309	BRN_KO_901	+	Intergenic	Intergenic
chr1	88289490	88289558	BRN_KO_902	-	Intergenic	Intergenic
chr1	89454567	89454582	BRN_KO_903	+	Intergenic	Intergenic
chr1	89495692	89495731	BRN_KO_904	+	Agap1	Coding_intron
chr1	89888843	89888887	BRN_KO_905	+	Agap1	Coding_cdsexon
chr1	89890908	89891315	BRN_KO_906	+	Agap1	UTR3
chr1	89891331	89891407	BRN_KO_907	+	Agap1	UTR3
chr1	89891957	89892005	BRN_KO_908	+	Agap1	UTR3
chr1	89894368	89894459	BRN_KO_909	+	Agap1	UTR3
chr1	89894805	89894871	BRN_KO_910	+	Agap1	UTR3
chr1	89895027	89895128	BRN_KO_911	+	Agap1	UTR3
chr1	89895130	89895236	BRN_KO_912	+	Agap1	UTR3
chr1	89952235	89952295	BRN_KO_913	-	Asb18	UTR3
chr1	90152142	90152158	BRN_KO_914	-	Iqca	Coding_intron
chr1	90760569	90760586	BRN_KO_915	-	Intergenic	Intergenic
chr1	91339784	91339799	BRN_KO_916	-	Intergenic	Intergenic
chr1	91345254	91345268	BRN_KO_917	-	Intergenic	Intergenic
chr1	91416038	91416062	BRN_KO_918	-	Per2	UTR3
chr1	91417113	91417175	BRN_KO_919	-	Per2	UTR3
chr1	91442201	91442277	BRN_KO_920	-	Per2	Coding_intron
chr1	91631843	91631907	BRN_KO_921	-	Intergenic	Intergenic
chr1	91928779	91928846	BRN_KO_922	-	Hdac4	UTR3
chr1	91928880	91928918	BRN_KO_923	-	Hdac4	UTR3
chr1	91928963	91928999	BRN_KO_924	-	Hdac4	UTR3
chr1	91929454	91929552	BRN_KO_925	-	Hdac4	UTR3
chr1	91929812	91929938	BRN_KO_926	-	Hdac4	UTR3
chr1	91930410	91930529	BRN_KO_927	-	Hdac4	UTR3
chr1	91930717	91930757	BRN_KO_928	-	Hdac4	UTR3
chr1	91930930	91931016	BRN_KO_929	-	Hdac4	UTR3
chr1	91931601	91931688	BRN_KO_930	-	Hdac4	UTR3
chr1	91931796	91931978	BRN_KO_931	-	Hdac4	UTR3
chr1	91932007	91932198	BRN_KO_932	-	Hdac4	UTR3
chr1	91932204	91932358	BRN_KO_933	-	Hdac4	UTR3
chr1	91932777	91932827	BRN_KO_934	-	Hdac4	UTR3
chr1	91932882	91932958	BRN_KO_935	-	Hdac4	UTR3
chr1	92073118	92073210	BRN_KO_936	-	Hdac4	Coding_intron
chr1	92143736	92143908	BRN_KO_937	-	Hdac4	Coding_intron
chr1	92205007	92205026	BRN_KO_938	+	Intergenic	Intergenic
chr1	92466377	92466411	BRN_KO_939	-	Ndufa10	Coding_intron
chr1	92724061	92724084	BRN_KO_940	-	Intergenic	Intergenic
chr1	92850380	92850403	BRN_KO_941	+	Gpc1	Coding_intron
chr1	92852356	92852412	BRN_KO_942	+	Gpc1	Coding_intron
chr1	93015471	93015730	BRN_KO_943	-	Kif1a	UTR3
chr1	93017902	93018171	BRN_KO_944	-	Kif1a	UTR3
chr1	93018173	93018267	BRN_KO_945	-	Kif1a	UTR3
chr1	93019798	93019868	BRN_KO_946	-	Kif1a	Coding_cdsexon
chr1	93022960	93023024	BRN_KO_947	-	Kif1a	Coding_cdsexon
chr1	93049353	93049418	BRN_KO_948	-	Kif1a	Coding_intron
chr1	93071637	93071688	BRN_KO_949	-	Kif1a	Coding_intron
chr1	93256198	93256214	BRN_KO_950	-	Intergenic	Intergenic
chr1	93406430	93406448	BRN_KO_951	-	Hdlbp	UTR3
chr1	93508065	93508179	BRN_KO_952	+	2018-09-02	UTR3
chr1	93508183	93508447	BRN_KO_953	+	2018-09-02	UTR3
chr1	93508678	93508772	BRN_KO_954	+	2018-09-02	UTR3
chr1	93509224	93509316	BRN_KO_955	+	2018-09-02	UTR3
chr1	93509589	93509623	BRN_KO_956	+	2018-09-02	UTR3
chr1	93563856	93563873	BRN_KO_957	-	Intergenic	Intergenic
chr1	93706465	93706536	BRN_KO_958	-	Thap4	Coding_intron
chr1	94080829	94080843	BRN_KO_959	-	Intergenic	Intergenic
chr1	94205321	94205368	BRN_KO_960	-	Intergenic	Intergenic
chr1	94467424	94467494	BRN_KO_961	-	Intergenic	Intergenic
chr1	94467582	94467644	BRN_KO_962	-	Intergenic	Intergenic
chr1	94467666	94467725	BRN_KO_963	-	Intergenic	Intergenic
chr1	94467794	94467855	BRN_KO_964	-	Intergenic	Intergenic
chr1	94467867	94468009	BRN_KO_965	-	Intergenic	Intergenic
chr1	94468151	94468185	BRN_KO_966	-	Intergenic	Intergenic
chr1	94468514	94468565	BRN_KO_967	-	Intergenic	Intergenic
chr1	95334047	95334202	BRN_KO_968	+	Fam174a	UTR3
chr1	95334244	95334341	BRN_KO_969	+	Fam174a	UTR3
chr1	95334414	95334524	BRN_KO_970	+	Fam174a	UTR3
chr1	95368324	95368404	BRN_KO_971	-	Intergenic	Intergenic
chr1	95830739	95831345	BRN_KO_972	-	Intergenic	Intergenic
chr1	95831359	95831529	BRN_KO_973	-	Intergenic	Intergenic
chr1	95831546	95831616	BRN_KO_974	-	Intergenic	Intergenic
chr1	95831656	95831803	BRN_KO_975	-	Intergenic	Intergenic
chr1	95831814	95831914	BRN_KO_976	-	Intergenic	Intergenic
chr1	96044616	96044652	BRN_KO_977	-	Intergenic	Intergenic
chr1	96343211	96343271	BRN_KO_978	-	Intergenic	Intergenic
chr1	96451240	96451299	BRN_KO_979	-	Intergenic	Intergenic
chr1	96601214	96601248	BRN_KO_980	-	Intergenic	Intergenic
chr1	97644354	97644405	BRN_KO_981	-	D1Ertd622e	UTR3
chr1	97644500	97644530	BRN_KO_982	-	D1Ertd622e	UTR3
chr1	97644944	97645094	BRN_KO_983	-	D1Ertd622e	UTR3
chr1	97821325	97821459	BRN_KO_984	-	Pam	UTR3
chr1	97821623	97821736	BRN_KO_985	-	Pam	UTR3
chr1	98638962	98638990	BRN_KO_986	-	Intergenic	Intergenic
chr1	98776913	98776945	BRN_KO_987	-	Intergenic	Intergenic
chr1	99952987	99953060	BRN_KO_988	+	Cntnap5b	Coding_intron
chr1	100288752	100288816	BRN_KO_989	+	Cntnap5b	Coding_intron
chr1	100490478	100490529	BRN_KO_990	+	Intergenic	Intergenic
chr1	100738882	100738963	BRN_KO_991	+	Intergenic	Intergenic
chr1	101434642	101434741	BRN_KO_992	-	Intergenic	Intergenic
chr1	102506873	102506890	BRN_KO_993	-	Intergenic	Intergenic
chr1	102687914	102687929	BRN_KO_994	-	Intergenic	Intergenic
chr1	102798816	102798883	BRN_KO_995	-	Intergenic	Intergenic
chr1	103739520	103739608	BRN_KO_996	+	Intergenic	Intergenic
chr1	104078974	104078990	BRN_KO_997	-	Intergenic	Intergenic
chr1	104995249	104995416	BRN_KO_998	+	Cdh20	UTR3
chr1	105276952	105277006	BRN_KO_999	-	Rnf152	UTR3
chr1	105280244	105280324	BRN_KO_1000	-	Rnf152	UTR3
chr1	105281026	105281059	BRN_KO_1001	-	Rnf152	UTR3
chr1	105283326	105283376	BRN_KO_1002	-	Rnf152	UTR3
chr1	105283489	105283539	BRN_KO_1003	-	Rnf152	UTR3
chr1	105303982	105304039	BRN_KO_1004	-	Rnf152	Coding_intron
chr1	105692990	105693025	BRN_KO_1005	+	2310035C23Rik	Coding_cdsexon
chr1	105699132	105699150	BRN_KO_1006	-	Intergenic	Intergenic
chr1	105753960	105754050	BRN_KO_1007	+	2310035C23Rik	UTR3
chr1	105754314	105754388	BRN_KO_1008	+	2310035C23Rik	UTR3
chr1	105764962	105765025	BRN_KO_1009	+	Intergenic	Intergenic
chr1	105765065	105765123	BRN_KO_1010	+	Intergenic	Intergenic
chr1	105765189	105765226	BRN_KO_1011	+	Intergenic	Intergenic
chr1	105765950	105766021	BRN_KO_1012	+	Intergenic	Intergenic
chr1	105766173	105766279	BRN_KO_1013	+	Intergenic	Intergenic
chr1	106240911	106240988	BRN_KO_1014	+	Phlpp1	Coding_intron
chr1	106332672	106332732	BRN_KO_1015	+	Phlpp1	Coding_intron
chr1	106365499	106365646	BRN_KO_1016	+	Phlpp1	Coding_intron
chr1	106389203	106389271	BRN_KO_1017	+	Phlpp1	Coding_intron
chr1	106393212	106393300	BRN_KO_1018	+	Phlpp1	Coding_cdsexon
chr1	106393437	106393488	BRN_KO_1019	+	Phlpp1	UTR3
chr1	106393734	106393828	BRN_KO_1020	+	Phlpp1	UTR3
chr1	106393871	106394004	BRN_KO_1021	+	Phlpp1	UTR3
chr1	106394109	106394189	BRN_KO_1022	+	Phlpp1	UTR3
chr1	106538308	106538372	BRN_KO_1023	-	Bcl2	UTR3
chr1	106540384	106540442	BRN_KO_1024	-	Bcl2	UTR3
chr1	106540553	106540633	BRN_KO_1025	-	Bcl2	UTR3
chr1	106714330	106714351	BRN_KO_1026	+	Intergenic	Intergenic
chr1	106723959	106724025	BRN_KO_1027	-	Kdsr	UTR3
chr1	106771192	106771286	BRN_KO_1028	-	Vps4b	UTR3
chr1	106771367	106771402	BRN_KO_1029	-	Vps4b	UTR3
chr1	106771531	106771657	BRN_KO_1030	-	Vps4b	UTR3
chr1	107004894	107004964	BRN_KO_1031	-	Intergenic	Intergenic
chr1	107610463	107610527	BRN_KO_1032	+	Intergenic	Intergenic
chr1	108610422	108610480	BRN_KO_1033	-	Intergenic	Intergenic
chr1	108871092	108871142	BRN_KO_1034	-	Intergenic	Intergenic
chr1	108878996	108879056	BRN_KO_1035	-	Intergenic	Intergenic
chr1	109086528	109086565	BRN_KO_1036	-	Intergenic	Intergenic
chr1	109225291	109225352	BRN_KO_1037	-	Intergenic	Intergenic
chr1	109359835	109359896	BRN_KO_1038	-	Intergenic	Intergenic
chr1	109636291	109636359	BRN_KO_1039	+	Intergenic	Intergenic
chr1	109996784	109996824	BRN_KO_1040	+	Cdh7	UTR3
chr1	110131306	110131361	BRN_KO_1041	+	Cdh7	Coding_intron
chr1	110138598	110138690	BRN_KO_1042	+	Cdh7	UTR3
chr1	110140801	110140891	BRN_KO_1043	+	Intergenic	Intergenic
chr1	110887445	110887605	BRN_KO_1044	-	Intergenic	Intergenic
chr1	110888435	110888521	BRN_KO_1045	-	Cdh19	UTR3
chr1	111088610	111088630	BRN_KO_1046	-	Intergenic	Intergenic
chr1	111843052	111843089	BRN_KO_1047	-	Intergenic	Intergenic
chr1	112631816	112631873	BRN_KO_1048	+	Intergenic	Intergenic
chr1	112888722	112888801	BRN_KO_1049	-	Intergenic	Intergenic
chr1	113321179	113321199	BRN_KO_1050	-	Intergenic	Intergenic
chr1	114254962	114255019	BRN_KO_1051	-	Intergenic	Intergenic
chr1	114329163	114329209	BRN_KO_1052	-	Intergenic	Intergenic
chr1	114644233	114644307	BRN_KO_1053	+	Intergenic	Intergenic
chr1	115189642	115189706	BRN_KO_1054	-	Intergenic	Intergenic
chr1	115435362	115435401	BRN_KO_1055	+	Intergenic	Intergenic
chr1	115783202	115783270	BRN_KO_1056	+	Cntnap5a	Coding_intron
chr1	116587234	116587299	BRN_KO_1057	+	Cntnap5a	UTR3
chr1	116746840	116746927	BRN_KO_1058	+	Intergenic	Intergenic
chr1	117419973	117420009	BRN_KO_1059	+	Intergenic	Intergenic
chr1	118319279	118319391	BRN_KO_1060	-	Intergenic	Intergenic
chr1	118515403	118515445	BRN_KO_1061	+	Clasp1	Coding_intron
chr1	118526857	118526873	BRN_KO_1062	+	Clasp1	Coding_intron
chr1	118558989	118559018	BRN_KO_1063	-	Intergenic	Intergenic
chr1	118730425	118730444	BRN_KO_1064	+	Intergenic	Intergenic
chr1	119134216	119134235	BRN_KO_1065	-	Intergenic	Intergenic
chr1	119368744	119368774	BRN_KO_1066	-	Intergenic	Intergenic
chr1	119652476	119652648	BRN_KO_1067	-	Ptpn4	UTR3
chr1	119652652	119652822	BRN_KO_1068	-	Ptpn4	UTR3
chr1	119652846	119653138	BRN_KO_1069	-	Ptpn4	UTR3
chr1	119653140	119653217	BRN_KO_1070	-	Ptpn4	UTR3
chr1	119653244	119653346	BRN_KO_1071	-	Ptpn4	UTR3
chr1	119653367	119654087	BRN_KO_1072	-	Ptpn4	UTR3
chr1	119654138	119654441	BRN_KO_1073	-	Ptpn4	UTR3
chr1	119654496	119654759	BRN_KO_1074	-	Ptpn4	UTR3
chr1	119654774	119655035	BRN_KO_1075	-	Ptpn4	UTR3
chr1	119655111	119655520	BRN_KO_1076	-	Ptpn4	UTR3
chr1	119655533	119656104	BRN_KO_1077	-	Ptpn4	UTR3
chr1	119656353	119656633	BRN_KO_1078	-	Ptpn4	UTR3
chr1	119656960	119657154	BRN_KO_1079	-	Ptpn4	UTR3
chr1	119657194	119657603	BRN_KO_1080	-	Ptpn4	UTR3
chr1	119657696	119657746	BRN_KO_1081	-	Ptpn4	UTR3
chr1	119657787	119657866	BRN_KO_1082	-	Ptpn4	UTR3
chr1	119658075	119658345	BRN_KO_1083	-	Ptpn4	UTR3
chr1	119658359	119658894	BRN_KO_1084	-	Ptpn4	UTR3
chr1	119658948	119659075	BRN_KO_1085	-	Ptpn4	UTR3
chr1	119659077	119659246	BRN_KO_1086	-	Ptpn4	UTR3
chr1	119659352	119659412	BRN_KO_1087	-	Ptpn4	UTR3
chr1	119659522	119659577	BRN_KO_1088	-	Ptpn4	UTR3
chr1	119819709	119819750	BRN_KO_1089	-	Ptpn4	Coding_intron
chr1	119821731	119821781	BRN_KO_1090	+	Intergenic	Intergenic
chr1	119837115	119837170	BRN_KO_1091	-	Ptpn4	UTR5
chr1	120921427	120921491	BRN_KO_1092	-	Intergenic	Intergenic
chr1	121296060	121296143	BRN_KO_1093	-	Intergenic	Intergenic
chr1	121903874	121903934	BRN_KO_1094	-	Intergenic	Intergenic
chr1	122626704	122626779	BRN_KO_1095	-	Intergenic	Intergenic
chr1	123332909	123333055	BRN_KO_1096	-	Dpp10	UTR3
chr1	123333266	123333600	BRN_KO_1097	-	Dpp10	UTR3
chr1	123333879	123333993	BRN_KO_1098	-	Dpp10	UTR3
chr1	123339938	123340134	BRN_KO_1099	-	Dpp10	Coding_intron
chr1	123340169	123340231	BRN_KO_1100	-	Dpp10	Coding_intron
chr1	123357299	123357336	BRN_KO_1101	-	Dpp10	Coding_intron
chr1	123542341	123542403	BRN_KO_1102	-	Dpp10	Coding_intron
chr1	123590880	123591162	BRN_KO_1103	-	Dpp10	Coding_intron
chr1	123818558	123818628	BRN_KO_1104	-	Dpp10	Coding_intron
chr1	123839862	123839937	BRN_KO_1105	-	Dpp10	Coding_intron
chr1	123884885	123884938	BRN_KO_1106	-	Dpp10	Coding_intron
chr1	123924818	123924892	BRN_KO_1107	-	Dpp10	Coding_intron
chr1	123984208	123984312	BRN_KO_1108	-	Dpp10	Coding_intron
chr1	123992528	123992763	BRN_KO_1109	-	Dpp10	Coding_intron
chr1	124052708	124052830	BRN_KO_1110	-	Intergenic	Intergenic
chr1	124062296	124062374	BRN_KO_1111	-	Intergenic	Intergenic
chr1	124079185	124079289	BRN_KO_1112	-	Intergenic	Intergenic
chr1	124079302	124079364	BRN_KO_1113	-	Intergenic	Intergenic
chr1	124079533	124079641	BRN_KO_1114	-	Intergenic	Intergenic
chr1	124281714	124281772	BRN_KO_1115	+	Intergenic	Intergenic
chr1	124358446	124358484	BRN_KO_1116	-	Intergenic	Intergenic
chr1	124406851	124407016	BRN_KO_1117	-	Intergenic	Intergenic
chr1	124585555	124585655	BRN_KO_1118	-	Gm28928	Noncoding_intron
chr1	124694473	124694597	BRN_KO_1119	-	Gm28928	Noncoding_intron
chr1	124754559	124754630	BRN_KO_1120	-	Gm28928	Noncoding_intron
chr1	124761483	124761548	BRN_KO_1121	-	Gm28928	Noncoding_intron
chr1	124767353	124767436	BRN_KO_1122	-	Gm28928	Noncoding_intron
chr1	124784678	124784889	BRN_KO_1123	-	Gm28928	Noncoding_intron
chr1	125409653	125409744	BRN_KO_1124	-	Actr3	Coding_intron
chr1	125414326	125414471	BRN_KO_1125	-	Actr3	Coding_intron
chr1	125414482	125414558	BRN_KO_1126	-	Actr3	Coding_intron
chr1	125415254	125415361	BRN_KO_1127	-	Actr3	Coding_intron
chr1	125914474	125914545	BRN_KO_1128	-	Nckap5	UTR3
chr1	127295396	127295486	BRN_KO_1129	+	Mgat5	Coding_intron
chr1	127485185	127485227	BRN_KO_1130	+	Mgat5	UTR3
chr1	127486010	127486060	BRN_KO_1131	+	Mgat5	UTR3
chr1	127494715	127494815	BRN_KO_1132	-	Tmem163	Coding_intron
chr1	127607414	127607456	BRN_KO_1133	-	Tmem163	Coding_intron
chr1	127610266	127610385	BRN_KO_1134	-	Tmem163	Coding_intron
chr1	127619651	127620130	BRN_KO_1135	-	Tmem163	Coding_intron
chr1	127645757	127645795	BRN_KO_1136	-	Tmem163	Coding_intron
chr1	127688869	127688882	BRN_KO_1137	-	Intergenic	Intergenic
chr1	127803834	127803952	BRN_KO_1138	+	Ccnt2	UTR3
chr1	127805144	127805204	BRN_KO_1139	+	Ccnt2	UTR3
chr1	127805650	127805692	BRN_KO_1140	+	Ccnt2	UTR3
chr1	127847536	127847597	BRN_KO_1141	-	Intergenic	Intergenic
chr1	127911705	127911736	BRN_KO_1142	+	Rab3gap1	Coding_intron
chr1	127928604	127928853	BRN_KO_1143	+	Rab3gap1	Coding_intron
chr1	127942843	127942914	BRN_KO_1144	+	Rab3gap1	UTR3
chr1	127943123	127943215	BRN_KO_1145	+	Rab3gap1	UTR3
chr1	127943319	127943348	BRN_KO_1146	+	Rab3gap1	UTR3
chr1	128202402	128202426	BRN_KO_1147	+	R3hdm1	Coding_intron
chr1	128237651	128237711	BRN_KO_1148	+	R3hdm1	UTR3
chr1	128278373	128278450	BRN_KO_1149	+	Ubxn4	UTR3
chr1	128358479	128358494	BRN_KO_1150	-	Mcm6	Coding_intron
chr1	128588555	128588587	BRN_KO_1151	-	Cxcr4	UTR3
chr1	129286775	129286842	BRN_KO_1152	+	Thsd7b	Coding_intron
chr1	129469013	129469080	BRN_KO_1153	+	Thsd7b	Coding_intron
chr1	130121956	130122028	BRN_KO_1154	-	Intergenic	Intergenic
chr1	130568569	130568583	BRN_KO_1155	+	Intergenic	Intergenic
chr1	130692276	130692310	BRN_KO_1156	-	Pfkfb2	Coding_intron
chr1	130721396	130721460	BRN_KO_1157	+	Yod1	UTR3
chr1	130721712	130721749	BRN_KO_1158	+	Yod1	UTR3
chr1	130961500	130961569	BRN_KO_1159	-	Intergenic	Intergenic
chr1	131177068	131177093	BRN_KO_1160	-	Rassf5	UTR3
chr1	131177812	131177880	BRN_KO_1161	-	Rassf5	UTR3
chr1	131398201	131398220	BRN_KO_1162	-	Srgap2	Coding_intron
chr1	131554104	131554164	BRN_KO_1163	-	Intergenic	Intergenic
chr1	131570313	131570344	BRN_KO_1164	+	Intergenic	Intergenic
chr1	131757798	131757857	BRN_KO_1165	-	Intergenic	Intergenic
chr1	131885574	131885602	BRN_KO_1166	-	Intergenic	Intergenic
chr1	131932607	131932689	BRN_KO_1167	+	Nucks1	UTR3
chr1	131932715	131932960	BRN_KO_1168	+	Nucks1	UTR3
chr1	131935175	131935220	BRN_KO_1169	+	Nucks1	UTR3
chr1	131935237	131935578	BRN_KO_1170	+	Nucks1	UTR3
chr1	131935980	131936061	BRN_KO_1171	+	Nucks1	UTR3
chr1	132030059	132030123	BRN_KO_1172	+	Elk4	Coding_intron
chr1	132030166	132030247	BRN_KO_1173	+	Elk4	Coding_intron
chr1	132296082	132296103	BRN_KO_1174	+	Intergenic	Intergenic
chr1	132298973	132298992	BRN_KO_1175	-	Intergenic	Intergenic
chr1	132299115	132299133	BRN_KO_1176	+	Klhdc8a	UTR5
chr1	132391616	132391722	BRN_KO_1177	-	Intergenic	Intergenic
chr1	132464309	132464350	BRN_KO_1178	+	Dstyk	UTR3
chr1	132505480	132505588	BRN_KO_1179	+	Rbbp5	UTR3
chr1	132517873	132518045	BRN_KO_1180	-	Cntn2	Coding_intron
chr1	132578567	132578631	BRN_KO_1181	-	Nfasc	Coding_intron
chr1	132584675	132584692	BRN_KO_1182	-	Nfasc	Coding_intron
chr1	133010280	133010354	BRN_KO_1183	+	Intergenic	Intergenic
chr1	133033961	133033993	BRN_KO_1184	+	Intergenic	Intergenic
chr1	133034368	133034399	BRN_KO_1185	-	Intergenic	Intergenic
chr1	133139234	133139313	BRN_KO_1186	+	Ppp1r15b	UTR3
chr1	133139510	133139602	BRN_KO_1187	+	Ppp1r15b	UTR3
chr1	133139691	133139771	BRN_KO_1188	+	Ppp1r15b	UTR3
chr1	133155827	133155878	BRN_KO_1189	+	Intergenic	Intergenic
chr1	133171939	133171979	BRN_KO_1190	+	Intergenic	Intergenic
chr1	133172148	133172181	BRN_KO_1191	+	Intergenic	Intergenic
chr1	133172220	133172242	BRN_KO_1192	+	Intergenic	Intergenic
chr1	133301882	133301929	BRN_KO_1193	+	Plekha6	UTR3
chr1	133429372	133429393	BRN_KO_1194	-	Intergenic	Intergenic
chr1	133619936	133619997	BRN_KO_1195	-	Zc3h11a	UTR3
chr1	133702721	133703199	BRN_KO_1196	-	Atp2b4	UTR3
chr1	133703223	133703288	BRN_KO_1197	-	Atp2b4	UTR3
chr1	133703289	133703495	BRN_KO_1198	-	Atp2b4	UTR3
chr1	133704162	133704403	BRN_KO_1199	-	Atp2b4	UTR3
chr1	133704431	133704524	BRN_KO_1200	-	Atp2b4	UTR3
chr1	133704610	133704862	BRN_KO_1201	-	Atp2b4	UTR3
chr1	133705845	133705884	BRN_KO_1202	-	Atp2b4	UTR3
chr1	133706385	133706473	BRN_KO_1203	-	Atp2b4	UTR3
chr1	133706485	133706723	BRN_KO_1204	-	Atp2b4	UTR3
chr1	133706892	133706964	BRN_KO_1205	-	Atp2b4	Coding_cdsexon
chr1	133800690	133800730	BRN_KO_1206	-	Atp2b4	UTR5
chr1	134075579	134075626	BRN_KO_1207	-	Btg2	UTR3
chr1	134119406	134119452	BRN_KO_1208	+	Chit1	Coding_intron
chr1	134632025	134632088	BRN_KO_1209	+	Kdm5b	UTR3
chr1	134749030	134749079	BRN_KO_1210	+	Syt2	UTR3
chr1	134751558	134751650	BRN_KO_1211	+	Syt2	UTR3
chr1	134751654	134751722	BRN_KO_1212	+	Syt2	UTR3
chr1	134754859	134754965	BRN_KO_1213	-	Ppp1r12b	UTR3
chr1	134952697	134952765	BRN_KO_1214	-	Ppp1r12b	Coding_intron
chr1	135155313	135155409	BRN_KO_1215	+	Arl8a	UTR3
chr1	135155442	135155635	BRN_KO_1216	+	Arl8a	UTR3
chr1	135155651	135155758	BRN_KO_1217	+	Arl8a	UTR3
chr1	135155819	135155849	BRN_KO_1218	+	Arl8a	UTR3
chr1	135155931	135156061	BRN_KO_1219	+	Arl8a	UTR3
chr1	135156089	135156212	BRN_KO_1220	+	Arl8a	UTR3
chr1	135411432	135411451	BRN_KO_1221	+	Intergenic	Intergenic
chr1	135964702	135964719	BRN_KO_1222	-	Igfn1	Coding_cdsexon
chr1	136174375	136174449	BRN_KO_1223	+	Kif21b	UTR3
chr1	136174488	136174552	BRN_KO_1224	+	Kif21b	UTR3
chr1	136175970	136176099	BRN_KO_1225	+	Kif21b	UTR3
chr1	136176826	136176871	BRN_KO_1226	+	Kif21b	UTR3
chr1	136177637	136177677	BRN_KO_1227	+	Kif21b	UTR3
chr1	136177843	136177998	BRN_KO_1228	+	Kif21b	UTR3
chr1	136268316	136268394	BRN_KO_1229	-	Camsap2	UTR3
chr1	136268688	136268910	BRN_KO_1230	-	Camsap2	UTR3
chr1	136268967	136269681	BRN_KO_1231	-	Camsap2	UTR3
chr1	136269739	136269953	BRN_KO_1232	-	Camsap2	UTR3
chr1	136270132	136270560	BRN_KO_1233	-	Camsap2	UTR3
chr1	136270621	136270683	BRN_KO_1234	-	Camsap2	UTR3
chr1	136270757	136270922	BRN_KO_1235	-	Intergenic	Intergenic
chr1	136280886	136280925	BRN_KO_1236	-	Camsap2	Coding_cdsexon
chr1	136295363	136295381	BRN_KO_1237	-	Camsap2	Coding_intron
chr1	136345455	136345551	BRN_KO_1238	-	Camsap2	UTR5
chr1	136345556	136345613	BRN_KO_1239	-	Camsap2	UTR5
chr1	136345732	136345845	BRN_KO_1240	-	Camsap2	UTR5
chr1	136345856	136345944	BRN_KO_1241	-	Camsap2	UTR5
chr1	136365125	136365146	BRN_KO_1242	+	Intergenic	Intergenic
chr1	136495856	136495871	BRN_KO_1243	+	Kif14	Coding_cdsexon
chr1	136602663	136602679	BRN_KO_1244	-	Intergenic	Intergenic
chr1	136627881	136627929	BRN_KO_1245	+	Zfp281	Coding_cdsexon
chr1	136628104	136628152	BRN_KO_1246	+	Zfp281	UTR3
chr1	136628306	136628394	BRN_KO_1247	+	Zfp281	UTR3
chr1	136628608	136628661	BRN_KO_1248	+	Zfp281	UTR3
chr1	137021904	137021927	BRN_KO_1249	-	Intergenic	Intergenic
chr1	137169869	137169923	BRN_KO_1250	-	Intergenic	Intergenic
chr1	137966467	137966492	BRN_KO_1251	+	Mir181a-1	Noncoding_exon
chr1	137966649	137966673	BRN_KO_1252	+	Mir181b-1	Noncoding_exon
chr1	138291138	138291173	BRN_KO_1253	-	Intergenic	Intergenic
chr1	138484129	138484448	BRN_KO_1254	-	Nek7	UTR3
chr1	138484632	138484729	BRN_KO_1255	-	Nek7	UTR3
chr1	138485195	138485386	BRN_KO_1256	-	Nek7	UTR3
chr1	138485401	138485448	BRN_KO_1257	-	Nek7	UTR3
chr1	138485811	138485955	BRN_KO_1258	-	Nek7	UTR3
chr1	138485994	138486326	BRN_KO_1259	-	Nek7	UTR3
chr1	138486477	138486588	BRN_KO_1260	-	Nek7	UTR3
chr1	138486647	138486748	BRN_KO_1261	-	Nek7	UTR3
chr1	138486875	138486949	BRN_KO_1262	-	Nek7	UTR3
chr1	138486974	138487045	BRN_KO_1263	-	Nek7	Coding_cdsexon
chr1	139172063	139172104	BRN_KO_1264	+	Dennd1b	UTR3
chr1	139356119	139356206	BRN_KO_1265	-	Crb1	Coding_intron
chr1	139447845	139448102	BRN_KO_1266	+	Zbtb41	UTR3
chr1	139448251	139448311	BRN_KO_1267	+	Zbtb41	UTR3
chr1	139448346	139448494	BRN_KO_1268	+	Zbtb41	UTR3
chr1	139449061	139449156	BRN_KO_1269	+	Zbtb41	UTR3
chr1	139449325	139449460	BRN_KO_1270	+	Zbtb41	UTR3
chr1	139449611	139449758	BRN_KO_1271	+	Zbtb41	UTR3
chr1	139449794	139449853	BRN_KO_1272	+	Zbtb41	UTR3
chr1	139450223	139450617	BRN_KO_1273	+	Zbtb41	UTR3
chr1	139450622	139450692	BRN_KO_1274	+	Zbtb41	UTR3
chr1	139450818	139450894	BRN_KO_1275	+	Zbtb41	UTR3
chr1	139451150	139451198	BRN_KO_1276	+	Zbtb41	UTR3
chr1	139452699	139452789	BRN_KO_1277	+	Zbtb41	UTR3
chr1	139452867	139452975	BRN_KO_1278	+	Zbtb41	UTR3
chr1	140180635	140180795	BRN_KO_1279	+	Intergenic	Intergenic
chr1	141550126	141550180	BRN_KO_1280	+	Intergenic	Intergenic
chr1	143598844	143598905	BRN_KO_1281	-	Cdc73	UTR3
chr1	143602334	143602437	BRN_KO_1282	-	Cdc73	UTR3
chr1	143604311	143604355	BRN_KO_1283	-	Cdc73	UTR3
chr1	143605366	143605402	BRN_KO_1284	-	Cdc73	UTR3
chr1	143605544	143605614	BRN_KO_1285	-	Cdc73	UTR3
chr1	143608083	143608303	BRN_KO_1286	-	Cdc73	UTR3
chr1	143647124	143647174	BRN_KO_1287	+	B3galt2	Coding_cdsexon
chr1	143647390	143647603	BRN_KO_1288	+	B3galt2	UTR3
chr1	143647726	143647923	BRN_KO_1289	+	B3galt2	UTR3
chr1	143647988	143648069	BRN_KO_1290	+	B3galt2	UTR3
chr1	143665125	143665176	BRN_KO_1291	-	Cdc73	Coding_intron
chr1	143684534	143684619	BRN_KO_1292	+	Intergenic	Intergenic
chr1	143752307	143752347	BRN_KO_1293	-	Trove2	UTR3
chr1	143752493	143752562	BRN_KO_1294	-	Trove2	UTR3
chr1	143753362	143753434	BRN_KO_1295	-	Trove2	UTR3
chr1	143754679	143754792	BRN_KO_1296	-	Trove2	UTR3
chr1	143754921	143755212	BRN_KO_1297	-	Trove2	UTR3
chr1	143755279	143755425	BRN_KO_1298	-	Trove2	UTR3
chr1	143755722	143756032	BRN_KO_1299	-	Trove2	UTR3
chr1	143756145	143756497	BRN_KO_1300	-	Trove2	UTR3
chr1	143756501	143757083	BRN_KO_1301	-	Trove2	UTR3
chr1	143757273	143757336	BRN_KO_1302	-	Trove2	UTR3
chr1	143806889	143806925	BRN_KO_1303	+	Uchl5	UTR3
chr1	145120887	145120965	BRN_KO_1304	+	Intergenic	Intergenic
chr1	146452888	146452965	BRN_KO_1305	-	Gm29514	Noncoding_intron
chr1	146901922	146902014	BRN_KO_1306	+	Brinp3	Coding_cdsexon
chr1	147769791	147769846	BRN_KO_1307	-	Intergenic	Intergenic
chr1	148094757	148094809	BRN_KO_1308	-	Intergenic	Intergenic
chr1	149019198	149019266	BRN_KO_1309	+	Intergenic	Intergenic
chr1	149486743	149486787	BRN_KO_1310	+	Intergenic	Intergenic
chr1	149558013	149558033	BRN_KO_1311	-	Intergenic	Intergenic
chr1	151355973	151356024	BRN_KO_1312	+	Ivns1abp	UTR3
chr1	151363369	151363558	BRN_KO_1313	+	Ivns1abp	UTR3
chr1	151672590	151672612	BRN_KO_1314	-	Intergenic	Intergenic
chr1	151691401	151691472	BRN_KO_1315	-	Intergenic	Intergenic
chr1	151755351	151755401	BRN_KO_1316	+	Edem3	UTR5
chr1	151819251	151819389	BRN_KO_1317	+	Edem3	UTR3
chr1	151819487	151819540	BRN_KO_1318	+	Edem3	UTR3
chr1	151819828	151819879	BRN_KO_1319	+	Edem3	UTR3
chr1	151820562	151820612	BRN_KO_1320	+	Edem3	UTR3
chr1	151821528	151821745	BRN_KO_1321	+	Edem3	UTR3
chr1	151821849	151822164	BRN_KO_1322	+	Edem3	UTR3
chr1	151822259	151822288	BRN_KO_1323	+	Intergenic	Intergenic
chr1	152516778	152516904	BRN_KO_1324	-	Rgl1	UTR3
chr1	152516989	152517066	BRN_KO_1325	-	Rgl1	UTR3
chr1	152517402	152517487	BRN_KO_1326	-	Rgl1	UTR3
chr1	152517518	152517583	BRN_KO_1327	-	Rgl1	UTR3
chr1	152518000	152518133	BRN_KO_1328	-	Rgl1	UTR3
chr1	152518647	152518734	BRN_KO_1329	-	Rgl1	UTR3
chr1	152758289	152758346	BRN_KO_1330	-	Rgl1	Coding_intron
chr1	152879992	152880111	BRN_KO_1331	-	Smg7	Coding_intron
chr1	152926888	152926937	BRN_KO_1332	+	Intergenic	Intergenic
chr1	153026663	153026694	BRN_KO_1333	-	Intergenic	Intergenic
chr1	153219952	153220027	BRN_KO_1334	-	Lamc1	UTR3
chr1	153295113	153295174	BRN_KO_1335	-	Lamc1	Coding_intron
chr1	153455874	153455906	BRN_KO_1336	-	Dhx9	UTR3
chr1	153693217	153693295	BRN_KO_1337	+	Rgs8	UTR3
chr1	153908657	153909149	BRN_KO_1338	+	Glul	UTR3
chr1	153909169	153909710	BRN_KO_1339	+	Glul	UTR3
chr1	154394903	154394966	BRN_KO_1340	-	Cacna1e	UTR3
chr1	154476682	154476728	BRN_KO_1341	-	Cacna1e	Coding_intron
chr1	154497595	154497612	BRN_KO_1342	+	Intergenic	Intergenic
chr1	154542210	154542333	BRN_KO_1343	+	Intergenic	Intergenic
chr1	154662517	154662646	BRN_KO_1344	-	Cacna1e	Coding_intron
chr1	154668628	154668687	BRN_KO_1345	-	Cacna1e	Coding_intron
chr1	154848429	154848453	BRN_KO_1346	+	Intergenic	Intergenic
chr1	154859325	154859401	BRN_KO_1347	+	Intergenic	Intergenic
chr1	155097542	155097612	BRN_KO_1348	-	Ier5	UTR3
chr1	155097615	155097672	BRN_KO_1349	-	Ier5	UTR3
chr1	155098140	155098263	BRN_KO_1350	-	Ier5	UTR3
chr1	155158831	155158843	BRN_KO_1351	-	Intergenic	Intergenic
chr1	155174999	155175110	BRN_KO_1352	+	Stx6	Coding_intron
chr1	155180851	155180879	BRN_KO_1353	+	Stx6	Coding_intron
chr1	155240594	155240607	BRN_KO_1354	-	BC034090	Coding_intron
chr1	155251428	155251489	BRN_KO_1355	+	Intergenic	Intergenic
chr1	155275750	155275800	BRN_KO_1356	-	Xpr1	UTR3
chr1	155292017	155292073	BRN_KO_1357	-	Xpr1	Coding_intron
chr1	155401260	155401336	BRN_KO_1358	+	Intergenic	Intergenic
chr1	155417049	155417061	BRN_KO_1359	+	Intergenic	Intergenic
chr1	155465417	155465433	BRN_KO_1360	+	Intergenic	Intergenic
chr1	155722683	155722740	BRN_KO_1361	+	Intergenic	Intergenic
chr1	155782117	155782179	BRN_KO_1362	-	Qsox1	Coding_intron
chr1	155844968	155845049	BRN_KO_1363	-	Cep350	UTR3
chr1	155845053	155845242	BRN_KO_1364	-	Cep350	UTR3
chr1	155845356	155845424	BRN_KO_1365	-	Cep350	UTR3
chr1	155845556	155845648	BRN_KO_1366	-	Cep350	UTR3
chr1	155846827	155847057	BRN_KO_1367	-	Cep350	UTR3
chr1	155928916	155928950	BRN_KO_1368	-	Cep350	Coding_cdsexon
chr1	155972887	155972911	BRN_KO_1369	-	Cep350	UTR5
chr1	156005526	156005622	BRN_KO_1370	-	Tor1aip1	UTR3
chr1	156005752	156005848	BRN_KO_1371	-	Tor1aip1	UTR3
chr1	156006546	156006573	BRN_KO_1372	-	Tor1aip1	UTR3
chr1	156061969	156062037	BRN_KO_1373	+	Tor1aip2	Coding_cdsexon
chr1	156425126	156425207	BRN_KO_1374	-	Soat1	UTR3
chr1	156526390	156526450	BRN_KO_1375	+	Gm10031	UTR3
chr1	156526551	156526623	BRN_KO_1376	+	Gm10031	UTR3
chr1	156645792	156645838	BRN_KO_1377	+	Abl2	UTR3
chr1	156649272	156649302	BRN_KO_1378	+	Abl2	UTR3
chr1	156649465	156649544	BRN_KO_1379	+	Abl2	UTR3
chr1	156778627	156778665	BRN_KO_1380	-	Intergenic	Intergenic
chr1	156845898	156845958	BRN_KO_1381	-	Ralgps2	Coding_intron
chr1	156912011	156912231	BRN_KO_1382	-	Ralgps2	Coding_intron
chr1	156939420	156939439	BRN_KO_1383	-	Ralgps2	Coding_intron
chr1	157135211	157135428	BRN_KO_1384	-	Rasal2	UTR3
chr1	157135623	157135701	BRN_KO_1385	-	Rasal2	UTR3
chr1	157135958	157136019	BRN_KO_1386	-	Rasal2	UTR3
chr1	157136026	157136218	BRN_KO_1387	-	Rasal2	UTR3
chr1	157138901	157138963	BRN_KO_1388	-	Rasal2	UTR3
chr1	157139203	157139292	BRN_KO_1389	-	Rasal2	UTR3
chr1	157139847	157139928	BRN_KO_1390	-	Rasal2	UTR3
chr1	157140080	157140117	BRN_KO_1391	-	Rasal2	UTR3
chr1	157140139	157140402	BRN_KO_1392	-	Rasal2	UTR3
chr1	157140407	157140510	BRN_KO_1393	-	Rasal2	UTR3
chr1	157279243	157279301	BRN_KO_1394	-	Rasal2	Coding_intron
chr1	157279408	157279477	BRN_KO_1395	-	Rasal2	Coding_intron
chr1	157540323	157540386	BRN_KO_1396	-	Intergenic	Intergenic
chr1	158261796	158261965	BRN_KO_1397	-	Brinp2	Coding_intron
chr1	158262182	158262294	BRN_KO_1398	-	Brinp2	Coding_intron
chr1	158595826	158595906	BRN_KO_1399	+	Astn1	Coding_intron
chr1	158674131	158674247	BRN_KO_1400	+	Astn1	Coding_intron
chr1	159550532	159550600	BRN_KO_1401	+	Tnr	Coding_intron
chr1	159609279	159609364	BRN_KO_1402	+	Tnr	Coding_intron
chr1	159820797	159820975	BRN_KO_1403	+	Tnr	Coding_intron
chr1	159867202	159867333	BRN_KO_1404	+	Tnr	Coding_intron
chr1	159867360	159867393	BRN_KO_1405	+	Tnr	Coding_intron
chr1	160219285	160219396	BRN_KO_1406	-	Rabgap1l	UTR3
chr1	160222019	160222070	BRN_KO_1407	-	Rabgap1l	UTR3
chr1	160222794	160222854	BRN_KO_1408	-	Rabgap1l	UTR3
chr1	160222856	160222928	BRN_KO_1409	-	Rabgap1l	UTR3
chr1	160317005	160317100	BRN_KO_1410	-	Rabgap1l	Coding_intron
chr1	160338322	160338436	BRN_KO_1411	-	Rabgap1l	Coding_intron
chr1	160575659	160575684	BRN_KO_1412	-	Rabgap1l	Coding_intron
chr1	160728235	160728298	BRN_KO_1413	-	Rabgap1l	Coding_intron
chr1	160930074	160930113	BRN_KO_1414	+	Rc3h1	UTR5
chr1	160968071	160968093	BRN_KO_1415	+	Rc3h1	UTR3
chr1	160968186	160968273	BRN_KO_1416	+	Rc3h1	UTR3
chr1	160969815	160969913	BRN_KO_1417	+	Rc3h1	UTR3
chr1	160974034	160974140	BRN_KO_1418	+	Rc3h1	UTR3
chr1	160974695	160974780	BRN_KO_1419	+	Rc3h1	UTR3
chr1	161008843	161008952	BRN_KO_1420	-	Zbtb37	UTR3
chr1	161169750	161169812	BRN_KO_1421	+	Ankrd45	UTR3
chr1	161170102	161170241	BRN_KO_1422	+	Ankrd45	UTR3
chr1	161170307	161170468	BRN_KO_1423	+	Ankrd45	UTR3
chr1	161241227	161241313	BRN_KO_1424	-	Prdx6	UTR3
chr1	161813669	161813701	BRN_KO_1425	-	Gm37357	Noncoding_exon
chr1	161817452	161817487	BRN_KO_1426	-	Suco	UTR3
chr1	161872442	161872483	BRN_KO_1427	+	Intergenic	Intergenic
chr1	161987538	161987673	BRN_KO_1428	-	Dnm3	UTR3
chr1	161987688	161987739	BRN_KO_1429	-	Dnm3	UTR3
chr1	161987757	161988083	BRN_KO_1430	-	Dnm3	UTR3
chr1	161988129	161988194	BRN_KO_1431	-	Dnm3	UTR3
chr1	161988519	161988570	BRN_KO_1432	-	Dnm3	UTR3
chr1	161988705	161988738	BRN_KO_1433	-	Dnm3	UTR3
chr1	161988817	161989235	BRN_KO_1434	-	Dnm3	UTR3
chr1	161989459	161989536	BRN_KO_1435	-	Dnm3	UTR3
chr1	161989719	161989871	BRN_KO_1436	-	Dnm3	UTR3
chr1	161989998	161990178	BRN_KO_1437	-	Dnm3	UTR3
chr1	161991031	161991091	BRN_KO_1438	-	Dnm3	UTR3
chr1	161991716	161991821	BRN_KO_1439	-	Dnm3	UTR3
chr1	161991823	161992050	BRN_KO_1440	-	Dnm3	UTR3
chr1	162362928	162362942	BRN_KO_1441	+	Intergenic	Intergenic
chr1	162594560	162594734	BRN_KO_1442	+	Vamp4	UTR3
chr1	162594774	162594914	BRN_KO_1443	+	Vamp4	UTR3
chr1	162594916	162594948	BRN_KO_1444	+	Vamp4	UTR3
chr1	162595011	162595065	BRN_KO_1445	+	Vamp4	UTR3
chr1	162595080	162595134	BRN_KO_1446	+	Vamp4	UTR3
chr1	162595432	162595473	BRN_KO_1447	+	Vamp4	Coding_intron
chr1	162598744	162598804	BRN_KO_1448	+	Vamp4	UTR3
chr1	162598979	162599061	BRN_KO_1449	+	Vamp4	UTR3
chr1	162649576	162649661	BRN_KO_1450	+	Myoc	UTR3
chr1	162670741	162670796	BRN_KO_1451	-	Prrc2c	UTR3
chr1	162671793	162672007	BRN_KO_1452	-	Prrc2c	UTR3
chr1	162672031	162672154	BRN_KO_1453	-	Prrc2c	UTR3
chr1	162672236	162672443	BRN_KO_1454	-	Prrc2c	UTR3
chr1	162672534	162672584	BRN_KO_1455	-	Prrc2c	UTR3
chr1	162673089	162673201	BRN_KO_1456	-	Prrc2c	UTR3
chr1	162673238	162673366	BRN_KO_1457	-	Prrc2c	UTR3
chr1	162673512	162673531	BRN_KO_1458	-	Prrc2c	Coding_cdsexon
chr1	162853070	162853131	BRN_KO_1459	+	Intergenic	Intergenic
chr1	163207715	163207730	BRN_KO_1460	+	Intergenic	Intergenic
chr1	163245140	163245216	BRN_KO_1461	-	Prrx1	UTR3
chr1	163246299	163246351	BRN_KO_1462	-	Prrx1	UTR3
chr1	163246890	163246924	BRN_KO_1463	-	Prrx1	UTR3
chr1	163247430	163247454	BRN_KO_1464	-	Prrx1	UTR3
chr1	163247884	163248009	BRN_KO_1465	-	Prrx1	UTR3
chr1	163543968	163544003	BRN_KO_1466	-	Intergenic	Intergenic
chr1	163915904	163916044	BRN_KO_1467	+	Kifap3	UTR3
chr1	163916272	163916447	BRN_KO_1468	+	Kifap3	UTR3
chr1	163917017	163917072	BRN_KO_1469	+	Kifap3	UTR3
chr1	163942993	163943238	BRN_KO_1470	+	Scyl3	Coding_intron
chr1	164328812	164328896	BRN_KO_1471	+	Nme7	Coding_intron
chr1	164329025	164329286	BRN_KO_1472	+	Nme7	Coding_intron
chr1	164437109	164438376	BRN_KO_1473	-	Atp1b1	UTR3
chr1	165175530	165175569	BRN_KO_1474	-	Sft2d2	UTR3
chr1	165641642	165641665	BRN_KO_1475	+	Intergenic	Intergenic
chr1	165642309	165642334	BRN_KO_1476	-	Intergenic	Intergenic
chr1	165832568	165832663	BRN_KO_1477	-	Intergenic	Intergenic
chr1	165865670	165865761	BRN_KO_1478	-	Pou2f1	UTR3
chr1	165865998	165866142	BRN_KO_1479	-	Pou2f1	UTR3
chr1	165866163	165866244	BRN_KO_1480	-	Pou2f1	UTR3
chr1	165866245	165866472	BRN_KO_1481	-	Pou2f1	UTR3
chr1	165867071	165867240	BRN_KO_1482	-	Pou2f1	UTR3
chr1	165867866	165867928	BRN_KO_1483	-	Pou2f1	UTR3
chr1	165873242	165873321	BRN_KO_1484	-	Pou2f1	UTR3
chr1	165875141	165875264	BRN_KO_1485	-	Pou2f1	UTR3
chr1	165902227	165902313	BRN_KO_1486	-	Pou2f1	Coding_cdsexon
chr1	165906684	165906757	BRN_KO_1487	-	Pou2f1	Coding_cdsexon
chr1	166385040	166385058	BRN_KO_1488	+	Tada1	Coding_intron
chr1	167029751	167029777	BRN_KO_1489	+	Fam78b	Coding_intron
chr1	167030684	167030745	BRN_KO_1490	+	Fam78b	Coding_intron
chr1	167037799	167037839	BRN_KO_1491	+	Fam78b	Coding_intron
chr1	167224352	167224383	BRN_KO_1492	-	Uck2	UTR3
chr1	167225515	167225547	BRN_KO_1493	-	Uck2	UTR3
chr1	167284111	167284167	BRN_KO_1494	-	Uck2	Coding_intron
chr1	167502772	167502922	BRN_KO_1495	+	Intergenic	Intergenic
chr1	167560476	167560494	BRN_KO_1496	+	Intergenic	Intergenic
chr1	167816698	167816716	BRN_KO_1497	+	Lmx1a	Coding_intron
chr1	168053702	168053738	BRN_KO_1498	-	Intergenic	Intergenic
chr1	168082348	168082365	BRN_KO_1499	+	Gm20711	Noncoding_intron
chr1	168417498	168417609	BRN_KO_1500	-	Pbx1	Coding_intron
chr1	168449536	168449593	BRN_KO_1501	-	Intergenic	Intergenic
chr1	169002530	169002586	BRN_KO_1502	+	Intergenic	Intergenic
chr1	169050983	169051055	BRN_KO_1503	-	Intergenic	Intergenic
chr1	169213624	169213668	BRN_KO_1504	-	Intergenic	Intergenic
chr1	169562784	169562825	BRN_KO_1505	-	Intergenic	Intergenic
chr1	169692397	169692489	BRN_KO_1506	+	Rgs5	UTR3
chr1	169693365	169693503	BRN_KO_1507	+	Rgs5	UTR3
chr1	169695330	169695383	BRN_KO_1508	+	Rgs5	UTR3
chr1	169695636	169695693	BRN_KO_1509	+	Rgs5	UTR3
chr1	169695734	169695762	BRN_KO_1510	+	Rgs5	UTR3
chr1	169741526	169741917	BRN_KO_1511	-	Rgs4	UTR3
chr1	169742061	169742210	BRN_KO_1512	-	Rgs4	UTR3
chr1	169742677	169742790	BRN_KO_1513	-	Rgs4	UTR3
chr1	169743062	169743338	BRN_KO_1514	-	Rgs4	UTR3
chr1	169743343	169743376	BRN_KO_1515	-	Rgs4	UTR3
chr1	169743408	169743612	BRN_KO_1516	-	Rgs4	UTR3
chr1	169743740	169743764	BRN_KO_1517	-	Rgs4	Coding_cdsexon
chr1	169773048	169773094	BRN_KO_1518	+	Intergenic	Intergenic
chr1	170037343	170037405	BRN_KO_1519	-	Ddr2	Coding_intron
chr1	170193439	170193775	BRN_KO_1520	-	Uhmk1	UTR3
chr1	170195644	170195716	BRN_KO_1521	-	Uhmk1	UTR3
chr1	170195898	170195942	BRN_KO_1522	-	Uhmk1	UTR3
chr1	170197632	170197715	BRN_KO_1523	-	Uhmk1	UTR3
chr1	170198269	170198364	BRN_KO_1524	-	Uhmk1	UTR3
chr1	170198367	170198445	BRN_KO_1525	-	Uhmk1	UTR3
chr1	170199106	170199278	BRN_KO_1526	-	Uhmk1	UTR3
chr1	170199310	170199513	BRN_KO_1527	-	Uhmk1	UTR3
chr1	170199574	170199697	BRN_KO_1528	-	Uhmk1	UTR3
chr1	170314305	170314389	BRN_KO_1529	-	Nos1ap	Noncoding_intron
chr1	170483774	170483993	BRN_KO_1530	-	Nos1ap	Coding_intron
chr1	170493933	170493954	BRN_KO_1531	-	Nos1ap	Coding_intron
chr1	170573510	170573553	BRN_KO_1532	-	Nos1ap	Coding_intron
chr1	170636715	170636737	BRN_KO_1533	-	Intergenic	Intergenic
chr1	170681257	170681272	BRN_KO_1534	+	Olfml2b	Coding_intron
chr1	170707487	170707532	BRN_KO_1535	-	Atf6	UTR3
chr1	170825889	170825943	BRN_KO_1536	-	Atf6	Coding_intron
chr1	171072320	171072406	BRN_KO_1537	-	Intergenic	Intergenic
chr1	171072989	171073064	BRN_KO_1538	-	Intergenic	Intergenic
chr1	171231312	171231328	BRN_KO_1539	+	Intergenic	Intergenic
chr1	171281995	171282074	BRN_KO_1540	-	Usp21	UTR3
chr1	171533105	171533194	BRN_KO_1541	+	Intergenic	Intergenic
chr1	171711440	171711507	BRN_KO_1542	+	Intergenic	Intergenic
chr1	172179276	172179294	BRN_KO_1543	-	Intergenic	Intergenic
chr1	172184319	172184383	BRN_KO_1544	+	Dcaf8	Coding_intron
chr1	172197082	172197146	BRN_KO_1545	-	Pea15a	UTR3
chr1	172197372	172197444	BRN_KO_1546	-	Pea15a	UTR3
chr1	172197445	172197586	BRN_KO_1547	-	Pea15a	UTR3
chr1	172281843	172281896	BRN_KO_1548	-	Atp1a2	Coding_intron
chr1	172318680	172318783	BRN_KO_1549	+	Igsf8	Coding_cdsexon
chr1	172370045	172370121	BRN_KO_1550	+	Kcnj10	UTR3
chr1	172370169	172370315	BRN_KO_1551	+	Kcnj10	UTR3
chr1	172372770	172373050	BRN_KO_1552	+	Kcnj10	UTR3
chr1	172373325	172373383	BRN_KO_1553	+	Kcnj10	UTR3
chr1	172373694	172373787	BRN_KO_1554	+	Kcnj10	UTR3
chr1	172373815	172373953	BRN_KO_1555	+	Kcnj10	UTR3
chr1	172486356	172486373	BRN_KO_1556	+	Igsf9	Coding_intron
chr1	172668850	172668949	BRN_KO_1557	-	Intergenic	Intergenic
chr1	172668950	172668993	BRN_KO_1558	-	Intergenic	Intergenic
chr1	173336642	173337019	BRN_KO_1559	-	Cadm3	UTR3
chr1	173362749	173362909	BRN_KO_1560	-	Cadm3	Coding_intron
chr1	173362933	173362983	BRN_KO_1561	-	Cadm3	Coding_intron
chr1	173466701	173466715	BRN_KO_1562	+	Intergenic	Intergenic
chr1	173798937	173798977	BRN_KO_1563	+	Intergenic	Intergenic
chr1	173851913	173851960	BRN_KO_1564	-	Intergenic	Intergenic
chr1	174037456	174037498	BRN_KO_1565	-	Intergenic	Intergenic
chr1	174567195	174567298	BRN_KO_1566	+	Fmn2	Coding_intron
chr1	174620631	174620743	BRN_KO_1567	+	Fmn2	Coding_intron
chr1	174634541	174634786	BRN_KO_1568	+	Fmn2	Coding_intron
chr1	174696220	174696358	BRN_KO_1569	+	Fmn2	Coding_intron
chr1	174821669	174821759	BRN_KO_1570	+	Fmn2	UTR3
chr1	174822085	174822171	BRN_KO_1571	+	Fmn2	UTR3
chr1	174822473	174822708	BRN_KO_1572	+	Fmn2	UTR3
chr1	175056166	175056265	BRN_KO_1573	-	Intergenic	Intergenic
chr1	175266786	175266975	BRN_KO_1574	-	Rgs7	Coding_intron
chr1	175602996	175603072	BRN_KO_1575	+	Intergenic	Intergenic
chr1	175683290	175683335	BRN_KO_1576	-	Chml	UTR3
chr1	176734529	176734690	BRN_KO_1577	-	Cep170	UTR3
chr1	176734930	176735055	BRN_KO_1578	-	Cep170	UTR3
chr1	176735224	176735305	BRN_KO_1579	-	Cep170	UTR3
chr1	176772406	176772464	BRN_KO_1580	-	Cep170	Coding_intron
chr1	176811854	176811912	BRN_KO_1581	+	Intergenic	Intergenic
chr1	176890465	176890552	BRN_KO_1582	+	Sdccag8	Coding_intron
chr1	177020600	177020689	BRN_KO_1583	-	Akt3	Coding_intron
chr1	177021160	177021188	BRN_KO_1584	-	Akt3	Coding_intron
chr1	177022478	177022587	BRN_KO_1585	-	Akt3	UTR3
chr1	177023791	177023887	BRN_KO_1586	-	Akt3	UTR3
chr1	177024395	177024454	BRN_KO_1587	-	Akt3	UTR3
chr1	177025094	177025218	BRN_KO_1588	-	Akt3	UTR3
chr1	177155476	177155538	BRN_KO_1589	-	Akt3	Coding_intron
chr1	177328559	177328628	BRN_KO_1590	+	Intergenic	Intergenic
chr1	177374558	177374644	BRN_KO_1591	+	Intergenic	Intergenic
chr1	177447969	177448037	BRN_KO_1592	+	Zbtb18	Coding_cdsexon
chr1	177448713	177448939	BRN_KO_1593	+	Zbtb18	UTR3
chr1	177448943	177449182	BRN_KO_1594	+	Zbtb18	UTR3
chr1	177449253	177449585	BRN_KO_1595	+	Zbtb18	UTR3
chr1	177449638	177449978	BRN_KO_1596	+	Zbtb18	UTR3
chr1	177450126	177450548	BRN_KO_1597	+	Zbtb18	UTR3
chr1	177450550	177450761	BRN_KO_1598	+	Zbtb18	UTR3
chr1	177527629	177527644	BRN_KO_1599	+	Intergenic	Intergenic
chr1	177554876	177554935	BRN_KO_1600	+	Intergenic	Intergenic
chr1	177763897	177763951	BRN_KO_1601	-	Adss	UTR3
chr1	177985517	177985616	BRN_KO_1602	+	Gm16432	Noncoding_intron
chr1	178299827	178299922	BRN_KO_1603	+	Intergenic	Intergenic
chr1	178300064	178300208	BRN_KO_1604	+	Intergenic	Intergenic
chr1	178327541	178327584	BRN_KO_1605	-	Hnrnpu	UTR3
chr1	178328451	178328488	BRN_KO_1606	-	Hnrnpu	UTR3
chr1	178328703	178328786	BRN_KO_1607	-	Hnrnpu	UTR3
chr1	178539687	178539764	BRN_KO_1608	+	Kif26b	Coding_intron
chr1	178613809	178613854	BRN_KO_1609	+	Kif26b	Coding_intron
chr1	178738183	178738199	BRN_KO_1610	+	Kif26b	Coding_intron
chr1	178775958	178776029	BRN_KO_1611	+	Kif26b	Coding_intron
chr1	178957288	178957347	BRN_KO_1612	-	Smyd3	UTR3
chr1	179152204	179152221	BRN_KO_1613	+	Intergenic	Intergenic
chr1	179221467	179221516	BRN_KO_1614	-	Smyd3	Coding_intron
chr1	179297657	179297822	BRN_KO_1615	-	Smyd3	Coding_intron
chr1	179297960	179298088	BRN_KO_1616	-	Smyd3	Coding_intron
chr1	179687103	179687123	BRN_KO_1617	+	Sccpdh	UTR3
chr1	179745997	179746072	BRN_KO_1618	-	Ahctf1	UTR3
chr1	179746089	179746255	BRN_KO_1619	-	Ahctf1	UTR3
chr1	179875175	179875233	BRN_KO_1620	-	Intergenic	Intergenic
chr1	179960177	179960252	BRN_KO_1621	+	Intergenic	Intergenic
chr1	179960257	179960308	BRN_KO_1622	+	Intergenic	Intergenic
chr1	179960462	179960493	BRN_KO_1623	+	Cdc42bpa	UTR5
chr1	179960878	179960961	BRN_KO_1624	+	Cdc42bpa	UTR5
chr1	179961043	179961095	BRN_KO_1625	+	Cdc42bpa	UTR5
chr1	179966638	179967052	BRN_KO_1626	+	Cdc42bpa	Coding_intron
chr1	180101523	180101604	BRN_KO_1627	+	Cdc42bpa	Coding_intron
chr1	180162261	180162423	BRN_KO_1628	+	Cdc42bpa	UTR3
chr1	180162461	180162657	BRN_KO_1629	+	Cdc42bpa	UTR3
chr1	180164142	180164208	BRN_KO_1630	+	Cdc42bpa	UTR3
chr1	180164389	180164514	BRN_KO_1631	+	Cdc42bpa	UTR3
chr1	180164535	180164851	BRN_KO_1632	+	Cdc42bpa	UTR3
chr1	180164926	180165042	BRN_KO_1633	+	Cdc42bpa	UTR3
chr1	180165078	180165126	BRN_KO_1634	+	Cdc42bpa	UTR3
chr1	180165270	180165449	BRN_KO_1635	+	Cdc42bpa	UTR3
chr1	180198148	180198167	BRN_KO_1636	-	Adck3	Coding_intron
chr1	180432390	180432657	BRN_KO_1637	-	6330403A02Rik	UTR3
chr1	180432674	180432800	BRN_KO_1638	-	6330403A02Rik	UTR3
chr1	180432841	180432934	BRN_KO_1639	-	6330403A02Rik	UTR3
chr1	180432976	180433099	BRN_KO_1640	-	6330403A02Rik	UTR3
chr1	180435109	180435160	BRN_KO_1641	-	6330403A02Rik	UTR3
chr1	180435565	180435617	BRN_KO_1642	-	6330403A02Rik	UTR3
chr1	180436515	180436644	BRN_KO_1643	-	6330403A02Rik	UTR3
chr1	180436714	180436767	BRN_KO_1644	-	6330403A02Rik	UTR3
chr1	180437298	180437436	BRN_KO_1645	-	6330403A02Rik	UTR3
chr1	180437472	180437601	BRN_KO_1646	-	6330403A02Rik	UTR3
chr1	180437661	180437746	BRN_KO_1647	-	6330403A02Rik	UTR3
chr1	180437792	180437894	BRN_KO_1648	-	6330403A02Rik	UTR3
chr1	180483320	180483416	BRN_KO_1649	-	6330403A02Rik	UTR5
chr1	180556304	180556336	BRN_KO_1650	+	Intergenic	Intergenic
chr1	180753796	180753900	BRN_KO_1651	+	Acbd3	UTR3
chr1	180802583	180802607	BRN_KO_1652	-	H3f3a	UTR3
chr1	180813593	180813619	BRN_KO_1653	-	H3f3a	UTR5
chr1	180923566	180923584	BRN_KO_1654	-	Intergenic	Intergenic
chr1	181093307	181093377	BRN_KO_1655	+	Intergenic	Intergenic
chr1	181098601	181098617	BRN_KO_1656	+	Intergenic	Intergenic
chr1	181385693	181385767	BRN_KO_1657	+	Cnih3	Coding_intron
chr1	181387712	181387761	BRN_KO_1658	+	Cnih3	Coding_intron
chr1	181559269	181559333	BRN_KO_1659	-	Intergenic	Intergenic
chr1	181904054	181904137	BRN_KO_1660	-	Enah	UTR3
chr1	181905380	181905475	BRN_KO_1661	-	Enah	UTR3
chr1	182132191	182132258	BRN_KO_1662	+	Srp9	UTR3
chr1	182315607	182315655	BRN_KO_1663	-	Fbxo28	UTR3
chr1	182467894	182468000	BRN_KO_1664	-	Capn2	UTR3
chr1	182482354	182482368	BRN_KO_1665	+	Intergenic	Intergenic
chr1	182629722	182629755	BRN_KO_1666	+	Capn8	Coding_intron
chr1	182629847	182629898	BRN_KO_1667	+	Capn8	Coding_intron
chr1	182786765	182786778	BRN_KO_1668	+	Susd4	Coding_intron
chr1	182891992	182892008	BRN_KO_1669	-	Intergenic	Intergenic
chr1	183205001	183205045	BRN_KO_1670	-	Disp1	Coding_intron
chr1	183205118	183205226	BRN_KO_1671	-	Disp1	Coding_intron
chr1	183628841	183628893	BRN_KO_1672	-	Intergenic	Intergenic
chr1	183838588	183838615	BRN_KO_1673	+	Intergenic	Intergenic
chr1	184813697	184813775	BRN_KO_1674	-	2018-03-02	UTR3
chr1	184834672	184834771	BRN_KO_1675	-	2018-03-02	Coding_intron
chr1	184858342	184858372	BRN_KO_1676	-	Gm23780	Noncoding_exon
chr1	184896851	184897036	BRN_KO_1677	-	Mark1	UTR3
chr1	184897184	184897214	BRN_KO_1678	-	Mark1	UTR3
chr1	184898017	184898047	BRN_KO_1679	-	Mark1	UTR3
chr1	184898103	184898163	BRN_KO_1680	-	Mark1	UTR3
chr1	184898168	184898458	BRN_KO_1681	-	Mark1	UTR3
chr1	184999756	184999858	BRN_KO_1682	-	Intergenic	Intergenic
chr1	185166772	185166866	BRN_KO_1683	+	Intergenic	Intergenic
chr1	185212212	185212272	BRN_KO_1684	+	Rab3gap2	Coding_intron
chr1	185284249	185284338	BRN_KO_1685	+	Rab3gap2	UTR3
chr1	185286145	185286280	BRN_KO_1686	+	Rab3gap2	UTR3
chr1	185286325	185286477	BRN_KO_1687	+	Rab3gap2	UTR3
chr1	185286768	185286933	BRN_KO_1688	-	Iars2	UTR3
chr1	185357376	185357416	BRN_KO_1689	+	Bpnt1	UTR3
chr1	185648712	185648790	BRN_KO_1690	-	Intergenic	Intergenic
chr1	186033194	186033294	BRN_KO_1691	-	Intergenic	Intergenic
chr1	186405646	186405662	BRN_KO_1692	+	Intergenic	Intergenic
chr1	186608271	186608286	BRN_KO_1693	-	Intergenic	Intergenic
chr1	186730202	186730260	BRN_KO_1694	-	Rrp15	Coding_intron
chr1	186730616	186730666	BRN_KO_1695	-	Rrp15	Coding_intron
chr1	186730734	186730862	BRN_KO_1696	-	Rrp15	Coding_intron
chr1	186731084	186731108	BRN_KO_1697	-	Rrp15	Coding_intron
chr1	186731282	186731377	BRN_KO_1698	-	Rrp15	Coding_intron
chr1	186731387	186731421	BRN_KO_1699	-	Rrp15	Coding_intron
chr1	186731729	186731780	BRN_KO_1700	-	Rrp15	Coding_intron
chr1	186732058	186732307	BRN_KO_1701	-	Rrp15	Coding_intron
chr1	186732559	186732669	BRN_KO_1702	-	Rrp15	Coding_intron
chr1	186732960	186732996	BRN_KO_1703	-	Rrp15	Coding_intron
chr1	187214518	187214531	BRN_KO_1704	+	Intergenic	Intergenic
chr1	188130704	188130794	BRN_KO_1705	+	Esrrg	Coding_intron
chr1	188130799	188131022	BRN_KO_1706	+	Esrrg	Coding_intron
chr1	188211615	188211695	BRN_KO_1707	+	Esrrg	UTR3
chr1	188212755	188212817	BRN_KO_1708	+	Esrrg	UTR3
chr1	188212908	188213250	BRN_KO_1709	+	Esrrg	UTR3
chr1	188213280	188213726	BRN_KO_1710	+	Esrrg	UTR3
chr1	188214173	188214371	BRN_KO_1711	+	Esrrg	UTR3
chr1	188214410	188214524	BRN_KO_1712	+	Esrrg	UTR3
chr1	188214631	188214833	BRN_KO_1713	+	Esrrg	UTR3
chr1	188246355	188246385	BRN_KO_1714	-	Intergenic	Intergenic
chr1	188567914	188567958	BRN_KO_1715	+	Ush2a	Coding_intron
chr1	188988949	188988989	BRN_KO_1716	-	Kctd3	Coding_intron
chr1	189208082	189208137	BRN_KO_1717	-	Kcnk2	UTR3
chr1	189208433	189208480	BRN_KO_1718	-	Kcnk2	UTR3
chr1	189208976	189209025	BRN_KO_1719	-	Kcnk2	UTR3
chr1	189644673	189644694	BRN_KO_1720	+	Intergenic	Intergenic
chr1	189876038	189876070	BRN_KO_1721	+	Ptpn14	UTR3
chr1	189904699	189904762	BRN_KO_1722	-	Smyd2	Coding_intron
chr1	189984504	189984569	BRN_KO_1723	-	Intergenic	Intergenic
chr1	190118132	190118209	BRN_KO_1724	-	Prox1	UTR3
chr1	190118328	190118533	BRN_KO_1725	-	Prox1	UTR3
chr1	190118555	190118655	BRN_KO_1726	-	Prox1	UTR3
chr1	190119405	190119465	BRN_KO_1727	-	Prox1	UTR3
chr1	190119770	190119809	BRN_KO_1728	-	Prox1	UTR3
chr1	190120161	190120248	BRN_KO_1729	-	Prox1	UTR3
chr1	190343605	190343622	BRN_KO_1730	+	Intergenic	Intergenic
chr1	190756485	190756547	BRN_KO_1731	+	Intergenic	Intergenic
chr1	190756654	190756716	BRN_KO_1732	+	Intergenic	Intergenic
chr1	190902758	190902888	BRN_KO_1733	-	Rps6kc1	Coding_intron
chr1	190903054	190903203	BRN_KO_1734	-	Rps6kc1	Coding_intron
chr1	190917029	190917086	BRN_KO_1735	+	Intergenic	Intergenic
chr1	190945155	190945202	BRN_KO_1736	+	Angel2	UTR3
chr1	191050793	191051064	BRN_KO_1737	-	Tatdn3	Coding_intron
chr1	191224342	191224355	BRN_KO_1738	-	Intergenic	Intergenic
chr1	191263221	191263238	BRN_KO_1739	-	Intergenic	Intergenic
chr1	191355985	191356039	BRN_KO_1740	-	Ppp2r5a	Coding_intron
chr1	191388751	191388885	BRN_KO_1741	+	Intergenic	Intergenic
chr1	191389278	191389309	BRN_KO_1742	+	Intergenic	Intergenic
chr1	191389385	191389457	BRN_KO_1743	+	Intergenic	Intergenic
chr1	191396135	191396152	BRN_KO_1744	-	Ppp2r5a	Coding_intron
chr1	192098750	192098838	BRN_KO_1745	-	Rcor3	UTR3
chr1	192099082	192099132	BRN_KO_1746	-	Rcor3	UTR3
chr1	192202468	192202504	BRN_KO_1747	+	Kcnh1	Coding_intron
chr1	192317727	192317926	BRN_KO_1748	+	Kcnh1	Coding_intron
chr1	192339145	192339246	BRN_KO_1749	+	Kcnh1	Coding_intron
chr1	192454048	192454106	BRN_KO_1750	-	Intergenic	Intergenic
chr1	192516435	192516453	BRN_KO_1751	-	Hhat	Coding_intron
chr1	192609195	192609211	BRN_KO_1752	+	Intergenic	Intergenic
chr1	192666096	192666233	BRN_KO_1753	-	Hhat	Coding_intron
chr1	192792981	192792996	BRN_KO_1754	-	Intergenic	Intergenic
chr1	192844521	192844581	BRN_KO_1755	-	Sertad4	UTR3
chr1	193137427	193137467	BRN_KO_1756	-	Intergenic	Intergenic
chr1	193227821	193227868	BRN_KO_1757	+	Lamb3	Coding_intron
chr1	193227891	193227932	BRN_KO_1758	+	Lamb3	Coding_intron
chr1	194033253	194033302	BRN_KO_1759	-	Intergenic	Intergenic
chr1	194812459	194812590	BRN_KO_1760	+	Plxna2	UTR3
chr1	194812605	194812656	BRN_KO_1761	+	Plxna2	UTR3
chr1	194813248	194813286	BRN_KO_1762	+	Plxna2	UTR3
chr1	194813319	194813391	BRN_KO_1763	+	Plxna2	UTR3
chr1	194813971	194814019	BRN_KO_1764	+	Plxna2	UTR3
chr1	194816731	194816842	BRN_KO_1765	+	Plxna2	UTR3
chr1	194989747	194989795	BRN_KO_1766	+	A330023F24Rik	Noncoding_intron
chr1	195007236	195007291	BRN_KO_1767	+	A330023F24Rik	Noncoding_intron
chr1	195037089	195037115	BRN_KO_1768	+	Mir29b-2	Noncoding_exon
chr1	195037598	195037621	BRN_KO_1769	+	Mir29c	Noncoding_exon
chr1	195279220	195279269	BRN_KO_1770	-	Intergenic	Intergenic
chr1	195371650	195371705	BRN_KO_1771	+	Intergenic	Intergenic
chr1	195371739	195371831	BRN_KO_1772	+	Intergenic	Intergenic
chr1	195371874	195371911	BRN_KO_1773	+	Intergenic	Intergenic
chr10	3463858	3463929	BRN_KO_1774	+	Ppp1r14c	UTR3
chr10	3740272	3740293	BRN_KO_1775	+	Intergenic	Intergenic
chr10	3926393	3926493	BRN_KO_1776	+	Plekhg1	Coding_intron
chr10	3966847	3966921	BRN_KO_1777	+	Plekhg1	UTR3
chr10	3966979	3967116	BRN_KO_1778	+	Plekhg1	UTR3
chr10	3967180	3967254	BRN_KO_1779	+	Plekhg1	UTR3
chr10	4395797	4395834	BRN_KO_1780	+	Gm21781	Noncoding_exon
chr10	4495485	4495523	BRN_KO_1781	-	Intergenic	Intergenic
chr10	4614414	4614464	BRN_KO_1782	+	Esr1	Coding_intron
chr10	4872925	4873008	BRN_KO_1783	-	Intergenic	Intergenic
chr10	5020220	5020268	BRN_KO_1784	-	Syne1	UTR3
chr10	5128967	5129145	BRN_KO_1785	-	Intergenic	Intergenic
chr10	5161458	5161531	BRN_KO_1786	-	Intergenic	Intergenic
chr10	5206878	5206894	BRN_KO_1787	-	Intergenic	Intergenic
chr10	5217559	5217694	BRN_KO_1788	-	Intergenic	Intergenic
chr10	5227959	5227983	BRN_KO_1789	-	Intergenic	Intergenic
chr10	5268240	5268342	BRN_KO_1790	-	Intergenic	Intergenic
chr10	5825738	5825795	BRN_KO_1791	-	Rgs17	UTR3
chr10	5825808	5825952	BRN_KO_1792	-	Rgs17	UTR3
chr10	5825977	5826063	BRN_KO_1793	-	Rgs17	UTR3
chr10	5826193	5826303	BRN_KO_1794	-	Rgs17	UTR3
chr10	5826319	5826572	BRN_KO_1795	-	Rgs17	UTR3
chr10	5830477	5830553	BRN_KO_1796	-	Rgs17	UTR3
chr10	5830629	5830693	BRN_KO_1797	-	Rgs17	UTR3
chr10	5830707	5830884	BRN_KO_1798	-	Rgs17	UTR3
chr10	5831084	5831126	BRN_KO_1799	-	Rgs17	UTR3
chr10	5832353	5832461	BRN_KO_1800	-	Rgs17	UTR3
chr10	5832465	5832509	BRN_KO_1801	-	Rgs17	UTR3
chr10	5832524	5832678	BRN_KO_1802	-	Rgs17	UTR3
chr10	6424981	6425045	BRN_KO_1803	-	Intergenic	Intergenic
chr10	6469105	6469149	BRN_KO_1804	+	Intergenic	Intergenic
chr10	6662887	6662903	BRN_KO_1805	-	Intergenic	Intergenic
chr10	6852959	6853010	BRN_KO_1806	+	Oprm1	Coding_intron
chr10	6853246	6853368	BRN_KO_1807	+	Oprm1	Coding_intron
chr10	6859645	6859679	BRN_KO_1808	+	Oprm1	Coding_intron
chr10	6859881	6859921	BRN_KO_1809	+	Oprm1	Coding_intron
chr10	6859924	6860008	BRN_KO_1810	+	Oprm1	Coding_intron
chr10	6885789	6886203	BRN_KO_1811	-	Ipcef1	UTR3
chr10	6889045	6889526	BRN_KO_1812	-	Ipcef1	UTR3
chr10	6889609	6889683	BRN_KO_1813	-	Ipcef1	UTR3
chr10	6976785	6977019	BRN_KO_1814	-	Ipcef1	Coding_intron
chr10	7119164	7119246	BRN_KO_1815	-	Cnksr3	UTR3
chr10	7119252	7119310	BRN_KO_1816	-	Cnksr3	UTR3
chr10	7119321	7119440	BRN_KO_1817	-	Cnksr3	UTR3
chr10	7237475	7237513	BRN_KO_1818	+	Intergenic	Intergenic
chr10	7625192	7625264	BRN_KO_1819	+	Lrp11	UTR3
chr10	7629817	7629867	BRN_KO_1820	-	Pcmt1	UTR3
chr10	7629872	7629969	BRN_KO_1821	-	Pcmt1	UTR3
chr10	7630211	7630303	BRN_KO_1822	-	Pcmt1	UTR3
chr10	7630380	7630503	BRN_KO_1823	-	Pcmt1	UTR3
chr10	7630546	7630631	BRN_KO_1824	-	Pcmt1	UTR3
chr10	7630819	7630869	BRN_KO_1825	-	Pcmt1	UTR3
chr10	7656692	7656807	BRN_KO_1826	-	Pcmt1	Coding_intron
chr10	7713165	7713253	BRN_KO_1827	+	Lats1	UTR3
chr10	7713346	7713667	BRN_KO_1828	+	Lats1	UTR3
chr10	7714318	7714376	BRN_KO_1829	+	Lats1	UTR3
chr10	7714456	7714684	BRN_KO_1830	+	Lats1	UTR3
chr10	7714687	7714752	BRN_KO_1831	+	Lats1	UTR3
chr10	7715691	7715894	BRN_KO_1832	+	Lats1	UTR3
chr10	7715986	7716201	BRN_KO_1833	+	Lats1	UTR3
chr10	7716347	7716442	BRN_KO_1834	+	Lats1	UTR3
chr10	7813415	7813460	BRN_KO_1835	+	Ppil4	Coding_intron
chr10	7821391	7821498	BRN_KO_1836	+	Ppil4	UTR3
chr10	7821663	7821800	BRN_KO_1837	+	Ppil4	UTR3
chr10	7821844	7821948	BRN_KO_1838	+	Ppil4	UTR3
chr10	7821957	7822056	BRN_KO_1839	+	Ppil4	UTR3
chr10	7905539	7905562	BRN_KO_1840	+	Intergenic	Intergenic
chr10	7905983	7906026	BRN_KO_1841	-	Tab2	UTR3
chr10	7906076	7906184	BRN_KO_1842	-	Tab2	UTR3
chr10	7906728	7906805	BRN_KO_1843	-	Tab2	UTR3
chr10	7949776	7949854	BRN_KO_1844	-	Tab2	Coding_intron
chr10	8225695	8225775	BRN_KO_1845	-	Ust	Coding_intron
chr10	8722232	8722542	BRN_KO_1846	-	Sash1	UTR3
chr10	8722685	8722720	BRN_KO_1847	-	Sash1	UTR3
chr10	8724665	8724727	BRN_KO_1848	-	Sash1	UTR3
chr10	8724834	8725068	BRN_KO_1849	-	Sash1	UTR3
chr10	8829808	8829872	BRN_KO_1850	-	Sash1	Coding_intron
chr10	9068178	9068290	BRN_KO_1851	-	Intergenic	Intergenic
chr10	9344344	9344416	BRN_KO_1852	-	Intergenic	Intergenic
chr10	9472442	9472544	BRN_KO_1853	-	Intergenic	Intergenic
chr10	9571390	9571452	BRN_KO_1854	+	Intergenic	Intergenic
chr10	9609765	9609869	BRN_KO_1855	-	Intergenic	Intergenic
chr10	9609876	9610031	BRN_KO_1856	-	Intergenic	Intergenic
chr10	9747572	9747652	BRN_KO_1857	+	Intergenic	Intergenic
chr10	9747663	9747734	BRN_KO_1858	+	Intergenic	Intergenic
chr10	9755992	9756169	BRN_KO_1859	-	Stxbp5	UTR3
chr10	9758646	9758692	BRN_KO_1860	-	Stxbp5	UTR3
chr10	9758824	9758943	BRN_KO_1861	-	Stxbp5	UTR3
chr10	9828202	9828276	BRN_KO_1862	-	Stxbp5	Coding_intron
chr10	9828281	9828485	BRN_KO_1863	-	Stxbp5	Coding_intron
chr10	9900859	9900929	BRN_KO_1864	-	Stxbp5	UTR5
chr10	9901182	9901194	BRN_KO_1865	+	Intergenic	Intergenic
chr10	9968386	9968419	BRN_KO_1866	-	Intergenic	Intergenic
chr10	10423176	10423192	BRN_KO_1867	+	Intergenic	Intergenic
chr10	10686111	10686161	BRN_KO_1868	-	Grm1	UTR3
chr10	10874327	10874594	BRN_KO_1869	-	Grm1	Coding_intron
chr10	10946326	10946402	BRN_KO_1870	-	Grm1	Coding_intron
chr10	11213570	11213614	BRN_KO_1871	+	Shprh	UTR3
chr10	11213639	11214146	BRN_KO_1872	+	Shprh	UTR3
chr10	11214223	11214467	BRN_KO_1873	+	Shprh	UTR3
chr10	11214534	11214785	BRN_KO_1874	+	Shprh	UTR3
chr10	11214850	11214946	BRN_KO_1875	+	Shprh	UTR3
chr10	11215124	11215204	BRN_KO_1876	+	Shprh	UTR3
chr10	11217126	11217190	BRN_KO_1877	+	Shprh	UTR3
chr10	11217518	11217550	BRN_KO_1878	+	Shprh	UTR3
chr10	11295492	11295684	BRN_KO_1879	+	Fbxo30	UTR3
chr10	11297221	11297257	BRN_KO_1880	+	Fbxo30	UTR3
chr10	11447283	11447337	BRN_KO_1881	-	Intergenic	Intergenic
chr10	11471556	11471604	BRN_KO_1882	+	Intergenic	Intergenic
chr10	12060325	12060362	BRN_KO_1883	-	Intergenic	Intergenic
chr10	12382504	12382564	BRN_KO_1884	-	Utrn	UTR3
chr10	12382574	12382732	BRN_KO_1885	-	Utrn	UTR3
chr10	12383529	12383616	BRN_KO_1886	-	Utrn	UTR3
chr10	12383698	12383794	BRN_KO_1887	-	Utrn	UTR3
chr10	12383804	12383984	BRN_KO_1888	-	Utrn	UTR3
chr10	12417719	12418032	BRN_KO_1889	-	Utrn	Coding_intron
chr10	12629263	12629276	BRN_KO_1890	-	Utrn	Coding_intron
chr10	12683850	12683916	BRN_KO_1891	+	Intergenic	Intergenic
chr10	13129454	13129527	BRN_KO_1892	+	Plagl1	UTR3
chr10	13130596	13130690	BRN_KO_1893	+	Plagl1	UTR3
chr10	13130892	13130973	BRN_KO_1894	+	Plagl1	UTR3
chr10	13131503	13131551	BRN_KO_1895	+	Plagl1	UTR3
chr10	13402095	13402168	BRN_KO_1896	+	Intergenic	Intergenic
chr10	13402169	13402202	BRN_KO_1897	+	Intergenic	Intergenic
chr10	13966216	13966298	BRN_KO_1898	+	Hivep2	Coding_intron
chr10	13966308	13966439	BRN_KO_1899	+	Hivep2	Coding_intron
chr10	14127591	14127639	BRN_KO_1900	+	Hivep2	UTR5
chr10	14128064	14128150	BRN_KO_1901	+	Hivep2	Coding_cdsexon
chr10	14128934	14129041	BRN_KO_1902	+	Hivep2	Coding_cdsexon
chr10	14129042	14129135	BRN_KO_1903	+	Hivep2	Coding_cdsexon
chr10	14129540	14129613	BRN_KO_1904	+	Hivep2	Coding_cdsexon
chr10	14129665	14129706	BRN_KO_1905	+	Hivep2	Coding_cdsexon
chr10	14129865	14129988	BRN_KO_1906	+	Hivep2	Coding_cdsexon
chr10	14130186	14130242	BRN_KO_1907	+	Hivep2	Coding_cdsexon
chr10	14132159	14132241	BRN_KO_1908	+	Hivep2	Coding_cdsexon
chr10	14132245	14132462	BRN_KO_1909	+	Hivep2	Coding_cdsexon
chr10	14132497	14132547	BRN_KO_1910	+	Hivep2	Coding_cdsexon
chr10	14143459	14143615	BRN_KO_1911	+	Hivep2	Coding_cdsexon
chr10	14148974	14149131	BRN_KO_1912	+	Hivep2	Coding_cdsexon
chr10	14149262	14149309	BRN_KO_1913	+	Hivep2	Coding_cdsexon
chr10	14149333	14149450	BRN_KO_1914	+	Hivep2	Coding_cdsexon
chr10	14149452	14150742	BRN_KO_1915	+	Hivep2	UTR3
chr10	14150775	14150796	BRN_KO_1916	+	Hivep2	UTR3
chr10	14150847	14150995	BRN_KO_1917	+	Hivep2	UTR3
chr10	14151097	14151370	BRN_KO_1918	+	Hivep2	UTR3
chr10	14745703	14745841	BRN_KO_1919	-	Gm8355	Noncoding_exon
chr10	14974401	14974465	BRN_KO_1920	+	Intergenic	Intergenic
chr10	15404878	15404966	BRN_KO_1921	-	Intergenic	Intergenic
chr10	16053635	16053851	BRN_KO_1922	+	Intergenic	Intergenic
chr10	17725378	17725450	BRN_KO_1923	+	Cited2	UTR3
chr10	18055847	18055865	BRN_KO_1924	-	Intergenic	Intergenic
chr10	18100799	18100870	BRN_KO_1925	+	Reps1	Coding_intron
chr10	18532211	18532346	BRN_KO_1926	+	Nhsl1	UTR3
chr10	18580267	18580362	BRN_KO_1927	-	Intergenic	Intergenic
chr10	18581852	18581985	BRN_KO_1928	-	Intergenic	Intergenic
chr10	18583657	18583743	BRN_KO_1929	-	Intergenic	Intergenic
chr10	18586737	18586859	BRN_KO_1930	-	Intergenic	Intergenic
chr10	18586996	18587062	BRN_KO_1931	-	Intergenic	Intergenic
chr10	18587251	18587315	BRN_KO_1932	-	Intergenic	Intergenic
chr10	18587412	18587520	BRN_KO_1933	-	Intergenic	Intergenic
chr10	18587543	18587635	BRN_KO_1934	-	Intergenic	Intergenic
chr10	18690562	18690575	BRN_KO_1935	+	Intergenic	Intergenic
chr10	19044361	19044431	BRN_KO_1936	-	Intergenic	Intergenic
chr10	19181635	19181654	BRN_KO_1937	-	Intergenic	Intergenic
chr10	19610138	19610202	BRN_KO_1938	+	Ifngr1	UTR3
chr10	20281172	20281263	BRN_KO_1939	+	Map7	UTR3
chr10	20340307	20340358	BRN_KO_1940	+	Bclaf1	UTR3
chr10	20340937	20341035	BRN_KO_1941	+	Bclaf1	UTR3
chr10	20342302	20342351	BRN_KO_1942	+	Bclaf1	UTR3
chr10	20342426	20342492	BRN_KO_1943	+	Bclaf1	UTR3
chr10	20397071	20397267	BRN_KO_1944	-	Intergenic	Intergenic
chr10	20397342	20397382	BRN_KO_1945	-	Intergenic	Intergenic
chr10	20397521	20397658	BRN_KO_1946	-	Intergenic	Intergenic
chr10	20397703	20397827	BRN_KO_1947	-	Intergenic	Intergenic
chr10	20397849	20398130	BRN_KO_1948	-	Intergenic	Intergenic
chr10	20398690	20398860	BRN_KO_1949	-	Pde7b	UTR3
chr10	20398862	20399000	BRN_KO_1950	-	Pde7b	UTR3
chr10	20399013	20399173	BRN_KO_1951	-	Pde7b	UTR3
chr10	20399189	20399285	BRN_KO_1952	-	Pde7b	UTR3
chr10	20399378	20399851	BRN_KO_1953	-	Pde7b	UTR3
chr10	20399869	20399930	BRN_KO_1954	-	Pde7b	UTR3
chr10	20400105	20400144	BRN_KO_1955	-	Pde7b	UTR3
chr10	20400242	20400320	BRN_KO_1956	-	Pde7b	UTR3
chr10	20400350	20400386	BRN_KO_1957	-	Pde7b	UTR3
chr10	20459774	20459848	BRN_KO_1958	-	Pde7b	Coding_intron
chr10	20459859	20459897	BRN_KO_1959	-	Pde7b	Coding_intron
chr10	20702686	20702789	BRN_KO_1960	-	Pde7b	Coding_intron
chr10	21312134	21312196	BRN_KO_1961	+	Hbs1l	Coding_intron
chr10	21999658	21999762	BRN_KO_1962	+	Sgk1	UTR3
chr10	22138820	22138850	BRN_KO_1963	+	Intergenic	Intergenic
chr10	22280291	22280314	BRN_KO_1964	-	Gm26740	Noncoding_intron
chr10	22280700	22280735	BRN_KO_1965	-	Gm26740	Noncoding_intron
chr10	22281021	22281058	BRN_KO_1966	-	Gm26740	Noncoding_intron
chr10	22281196	22281239	BRN_KO_1967	-	Gm26740	Noncoding_intron
chr10	22281365	22281425	BRN_KO_1968	-	Gm26740	Noncoding_intron
chr10	22704238	22704288	BRN_KO_1969	-	Tbpl1	UTR3
chr10	22704405	22704435	BRN_KO_1970	-	Tbpl1	UTR3
chr10	22704959	22705506	BRN_KO_1971	-	Tbpl1	UTR3
chr10	23512061	23512080	BRN_KO_1972	+	Intergenic	Intergenic
chr10	23988622	23988669	BRN_KO_1973	+	Intergenic	Intergenic
chr10	24187844	24188427	BRN_KO_1974	+	Stx7	UTR3
chr10	24597707	24597754	BRN_KO_1975	+	Ctgf	UTR3
chr10	24598236	24598352	BRN_KO_1976	+	Ctgf	UTR3
chr10	24614243	24614281	BRN_KO_1977	+	Intergenic	Intergenic
chr10	24824530	24824576	BRN_KO_1978	-	Enpp3	Coding_intron
chr10	24924004	24924035	BRN_KO_1979	-	Arg1	Coding_intron
chr10	25085099	25085133	BRN_KO_1980	-	Intergenic	Intergenic
chr10	25164625	25164775	BRN_KO_1981	-	Intergenic	Intergenic
chr10	25169839	25169910	BRN_KO_1982	-	Akap7	UTR3
chr10	25193920	25194010	BRN_KO_1983	-	Akap7	Coding_intron
chr10	25201721	25201739	BRN_KO_1984	+	Intergenic	Intergenic
chr10	25522992	25523037	BRN_KO_1985	+	Epb41l2	UTR3
chr10	25523401	25523511	BRN_KO_1986	+	Epb41l2	UTR3
chr10	26038571	26038694	BRN_KO_1987	-	Tmem200a	Coding_intron
chr10	26040827	26040947	BRN_KO_1988	-	Tmem200a	Coding_intron
chr10	26274486	26274560	BRN_KO_1989	-	L3mbtl3	UTR3
chr10	26275419	26275549	BRN_KO_1990	-	L3mbtl3	UTR3
chr10	26811412	26811428	BRN_KO_1991	-	Intergenic	Intergenic
chr10	28092143	28092276	BRN_KO_1992	+	Ptprk	Coding_intron
chr10	28094579	28094633	BRN_KO_1993	+	Ptprk	Coding_intron
chr10	28469071	28469135	BRN_KO_1994	+	Ptprk	Coding_intron
chr10	28596449	28596557	BRN_KO_1995	+	Ptprk	UTR3
chr10	29147190	29147211	BRN_KO_1996	-	Intergenic	Intergenic
chr10	29199045	29199148	BRN_KO_1997	+	Soga3	UTR3
[truncated: 22,990 more rows]
