# Supplementary material for: PUMILIO hyperactivity drives premature aging of Norad-deficient mice
Source: eLife. 2019 Feb 8;8:e42650. doi: 10.7554/eLife.42650 (PMC6407921; doi:10.7554/eLife.42650)
Supplement: Supplementary file 2. [file elife-42650-supp2.xlsx]

## Sheet: Oligonucleotides
Supplementary Table 2: Oligonucleotides
Oligonucleotide name/description	Sequence
sgRNA#1 Norad deletion fwd (for cloning into pX330)	CACCGGCAACACTATCCTTGGGCC
sgRNA#1 Norad deletion rev (for cloning into pX330)	AAACGGCCCAAGGATAGTGTTGCC
sgRNA#2 Norad deletion fwd (for cloning into pX330)	CACCTGGCCTGGGTTAGATGTACC
sgRNA#2 Norad deletion rev (for cloning into pX330)	AAACGGTACATCTAACCCAGGCCA
sgRNA#1 fwd primer (incl. T7 promoter) for IVT	ttaatacgactcactatagGGCAACACTATCCTTGGGCC
sgRNA#2 fwd primer (incl. T7 promoter) for IVT	ttaatacgactcactatagGTGGCCTGGGTTAGATGTACC
sgRNA common rev primer for IVT	AAAAGCACCGACTCGGTGCC
RNA FISH probe fwd primer	TAAGCCATGTCTGGCCAGTGTG
RNA FISH probe rev primer (SP6 promoter)	GACATTTAGGTGACACTATAGTGTTCTAGATCCTGCAAGCGTAC
RiL19-new (eCLIP RNA linker)	Phos-AGAUCGGAAGAGCACACGUCUG-SpC3
Rand103Tr3-new (eCLIP DNA linker)	Phos-NNNNNNNNNNAGATCGGAAGAGCGTCGTGT-SpC3
AR17-new (eCLIP RT primer)	CAGACGTGTGCTCTTCCG
D501 (PAGE-purified) (index sequence)	AATGATACGGCGACCACCGAGATCTACACAGGCTATAACACTCTTTCCCTACACGACGCTCTTCCGATCT
D502 (PAGE-purified) (index sequence)	AATGATACGGCGACCACCGAGATCTACACGCCTCTATACACTCTTTCCCTACACGACGCTCTTCCGATCT
D503 (PAGE-purified) (index sequence)	AATGATACGGCGACCACCGAGATCTACACAGGATAGGACACTCTTTCCCTACACGACGCTCTTCCGATCT
D504 (PAGE-purified) (index sequence)	AATGATACGGCGACCACCGAGATCTACACTCAGAGCCACACTCTTTCCCTACACGACGCTCTTCCGATCT
D701 (PAGE-purified) (index sequence)	CAAGCAGAAGACGGCATACGAGATCGAGTAATGTGACTGGAGTTCAGACGTGTGCTCTTCCGATC
D702 (PAGE-purified) (index sequence)	CAAGCAGAAGACGGCATACGAGATTCTCCGGAGTGACTGGAGTTCAGACGTGTGCTCTTCCGATC
D703 (PAGE-purified) (index sequence)	CAAGCAGAAGACGGCATACGAGATAATGAGCGGTGACTGGAGTTCAGACGTGTGCTCTTCCGATC
mtDNA (mouse) fwd primer	CCTATCACCCTTGCCATCAT
mtDNA (mouse) rev primer	GAGGCTGTTGCTTGTGTGAC
nDNA (mouse) fwd primer	ATGGAAAGCCTGCCATCATG
nDNA (mouse) rev primer	TCCTTGTTGTTCAGCATCAC
mtDNA (human) fwd primer	CCGTCTGAACTATCCTGCC
mtDNA (human) rev primer	GCCGTAGTCGGTGTACTCGT
nDNA (human) fwd primer	GGGATAACATCCAGGGCATT
nDNA (human) rev primer	CCCTGACGTTTTAGGGCATA
18S qRT-PCR fwd primer	GTAACCCGTTGAACCCCATT
18S qRT-PCR rev primer	CCATCCAATCGGTAGTAGCG
Gapdh qRT-PCR fwd primer	ACCCAGAAGACTGTGGATGG
Gapdh qRT-PCR rev primer	GGATGCAGGGATGATGTTCT
Rhot1 qRT-PCR fwd primer	TTCATCCTACAGGGCCTCTATACT
Rhot1 qRT-PCR rev primer	CCTTTATACAAGCCGGTTTCA
Mff qRT-PCR fwd primer	GGAGTTCCAAATGCCAGTGT
Mff qRT-PCR rev primer	GATCTGCTGGTCTTGAAAATGA
Tomm70a qRT-PCR fwd primer	CAACCTATGCTGTCTACTCAGGAC
Tomm70a qRT-PCR rev primer	CCAGATCCAGCAGAATTTTCA
Slc25a46 qRT-PCR fwd primer	GGTTTCACACAAATTGAACCCTA
Slc25a46 qRT-PCR rev primer	GGCATGGCCACCATGTAT
Pdp1 qRT-PCR fwd primer	TCTAGCTAGCCCAGTATTCATATTGAC
Pdp1 qRT-PCR rev primer	AGGTCCAACAGGACAGAACAG
Sucla2 qRT-PCR fwd primer	CAATGGAGAGGTCATTTCAAGG
Sucla2 qRT-PCR rev primer	ACAATGGCTTCAGGGTTCTC
Pdha1 qRT-PCR fwd primer	GGCATCGTTGGAGCTCAG
Pdha1 qRT-PCR rev primer	ACAGACCTCATCTTTTCCATTGT
Idh3a qRT-PCR fwd primer	GAGGTTTTGCTGGTGGTGTT
Idh3a qRT-PCR rev primer	TGAAATTTCTGGGCCAATTC
Ndufs7 qRT-PCR fwd primer	CATTGTGCCAGTGGACATCT
Ndufs7 qRT-PCR rev primer	GCAAGATGCCATAAAGGAGTG
Atp5f1 qRT-PCR fwd primer	GCGCCATTACCTCTTCGAT
Atp5f1 qRT-PCR rev primer	CGTTCCCGGTAAGTGACCT
Atp5s qRT-PCR fwd primer	AGCTTAAAGAAAATCCCATGGTC
Atp5s qRT-PCR rev primer	CCCTGAGGCGTTCATAATCTA
Nadk2 qRT-PCR fwd primer	ATGGGCAGACGCTGTCATA
Nadk2 qRT-PCR rev primer	ACCCCAATGACAGGTTTAAGTC
Glul qRT-PCR fwd primer	CTCGCTCTCCTGACCTGTTC
Glul qRT-PCR rev primer	TTCAAGTGGGAACTTGCTGA
Sod2 qRT-PCR fwd primer	TGCTCTAATCAGGACCCATTG
Sod2 qRT-PCR rev primer	GTAGTAAGCGTGCTCCCACAC
Gclm qRT-PCR fwd primer	TGACTCACAATGACCCGAAA
Gclm qRT-PCR rev primer	TCAATGTCAGGGATGCTTTCT
Actb qRT-PCR fwd primer	CTAAGGCCAACCGTGAAAAG
Actb qRT-PCR rev primer	ACCAGAGGCATACAGGGACA
Neat1 qRT-PCR fwd primer	TTGGGACAGTGGACGTGTGG
Neat1 qRT-PCR rev primer	TCAAGTGCCAGCAGACAGCA
