# Supplementary figures and images for: PUMILIO hyperactivity drives premature aging of Norad-deficient mice
Source: eLife journal article supplement (doi:10.7554/elife.42650), 2019-02-08

Figure 7 – figure supplement 3

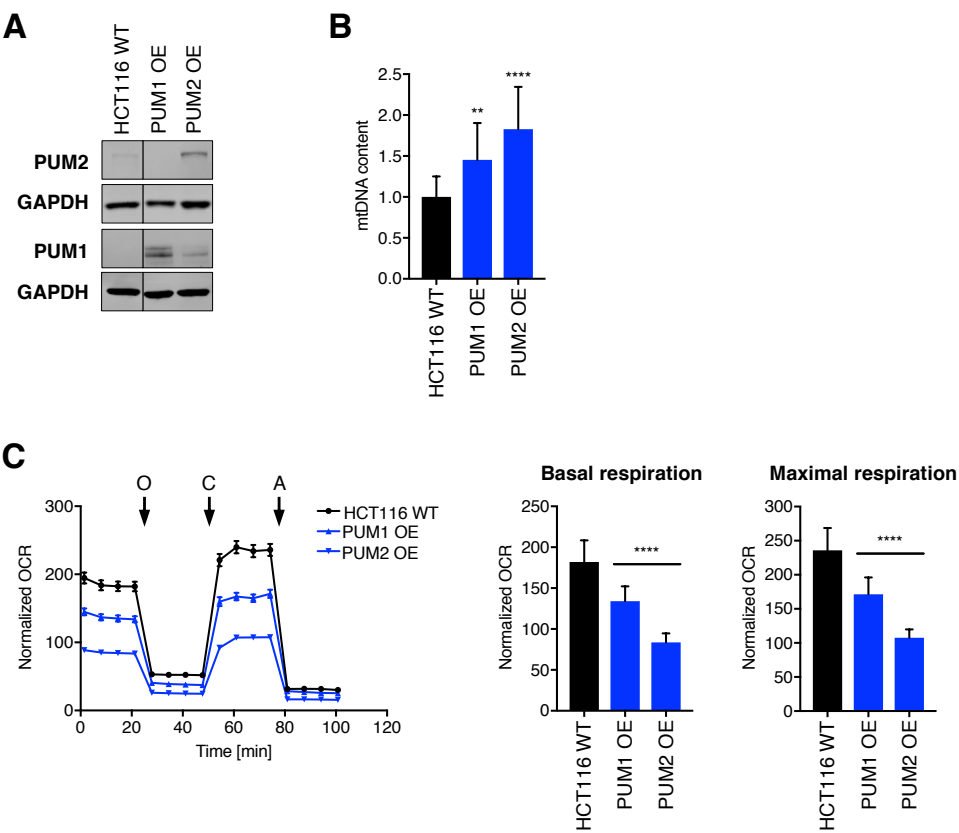

Supplement: supp [file elife-42650-supp-v1.zip]

Figure 7 – figure supplement 2

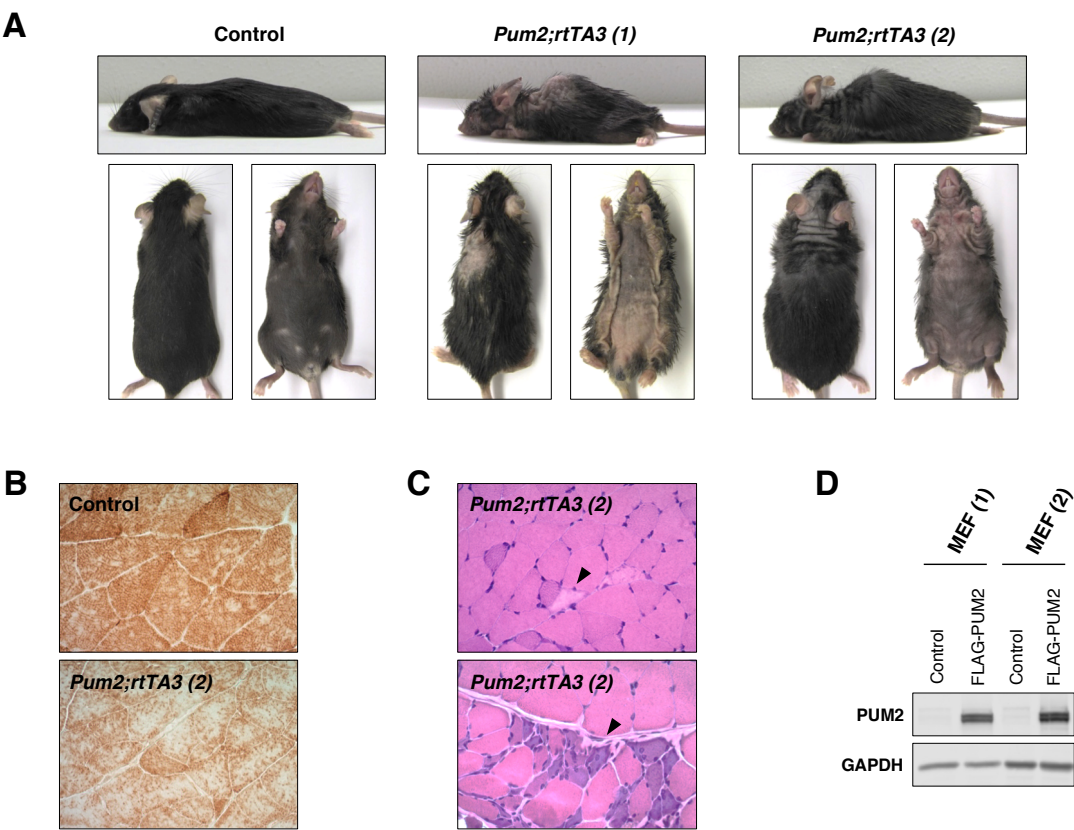

Supplement: supp [file elife-42650-supp-v1.zip]

Figure 7 – figure supplement 1

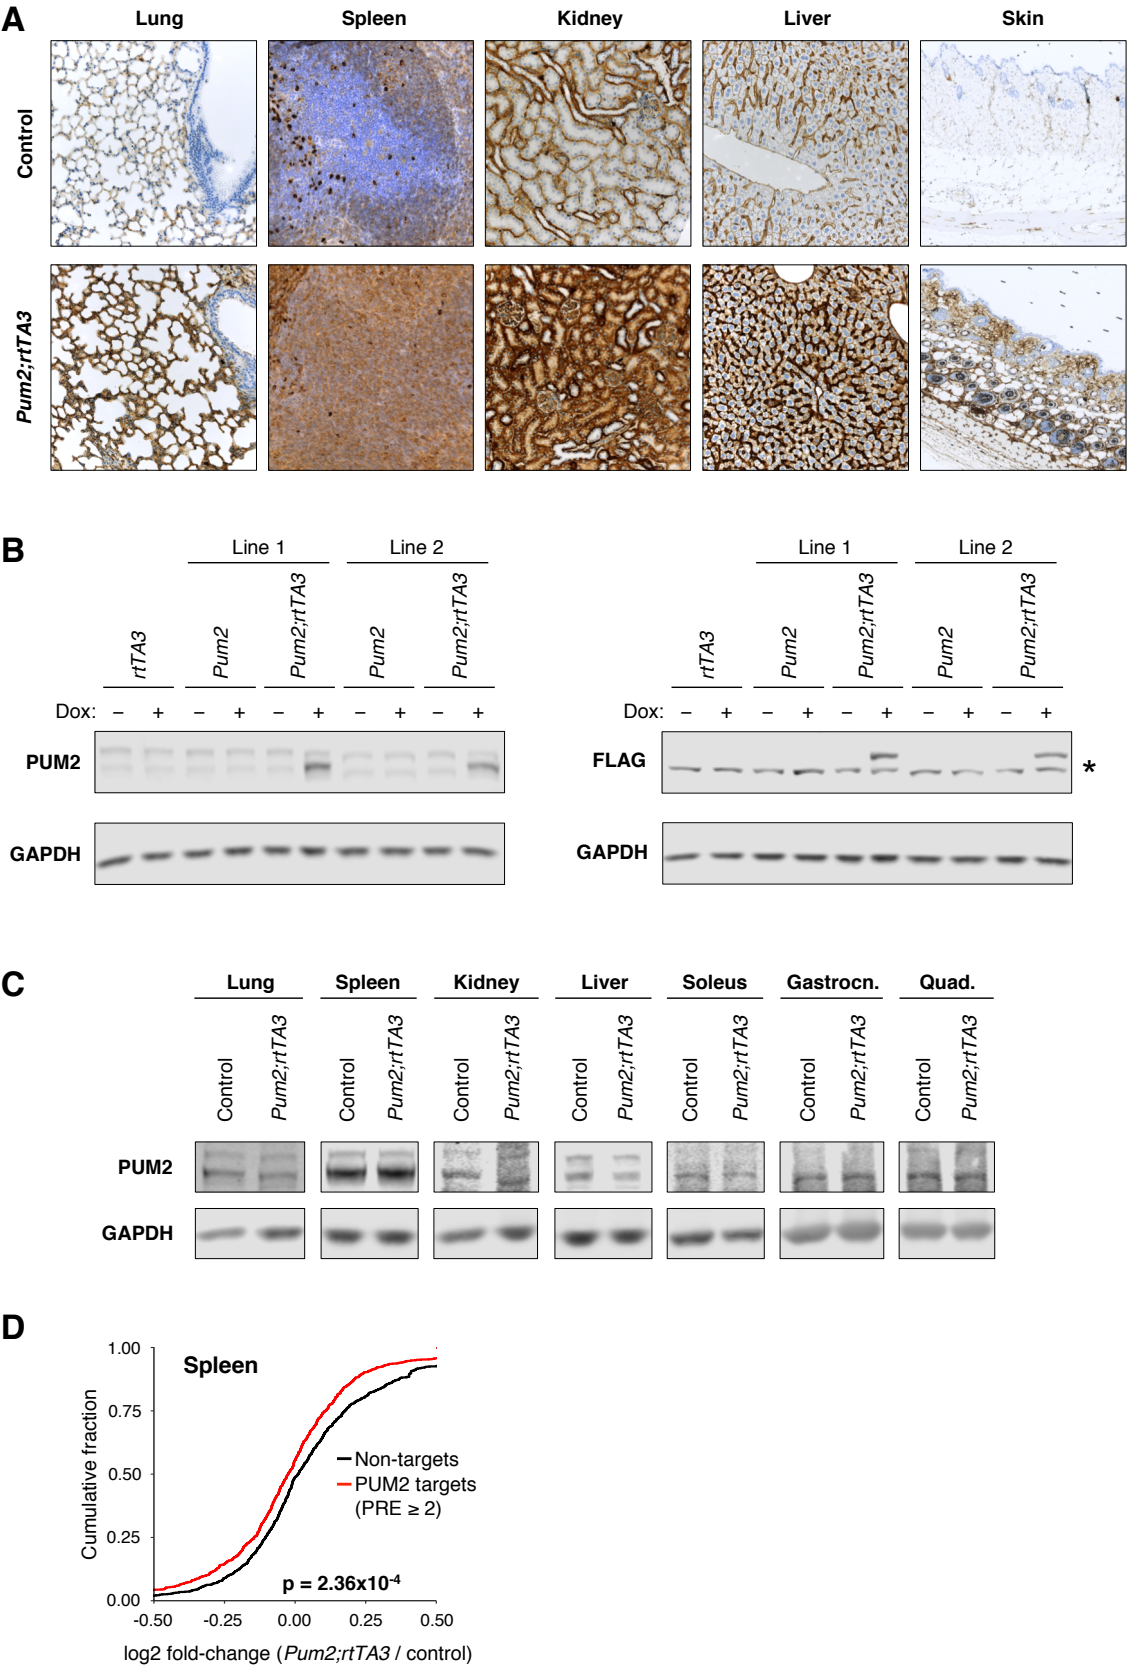

Supplement: supp [file elife-42650-supp-v1.zip]

Figure 6 – figure supplement 1

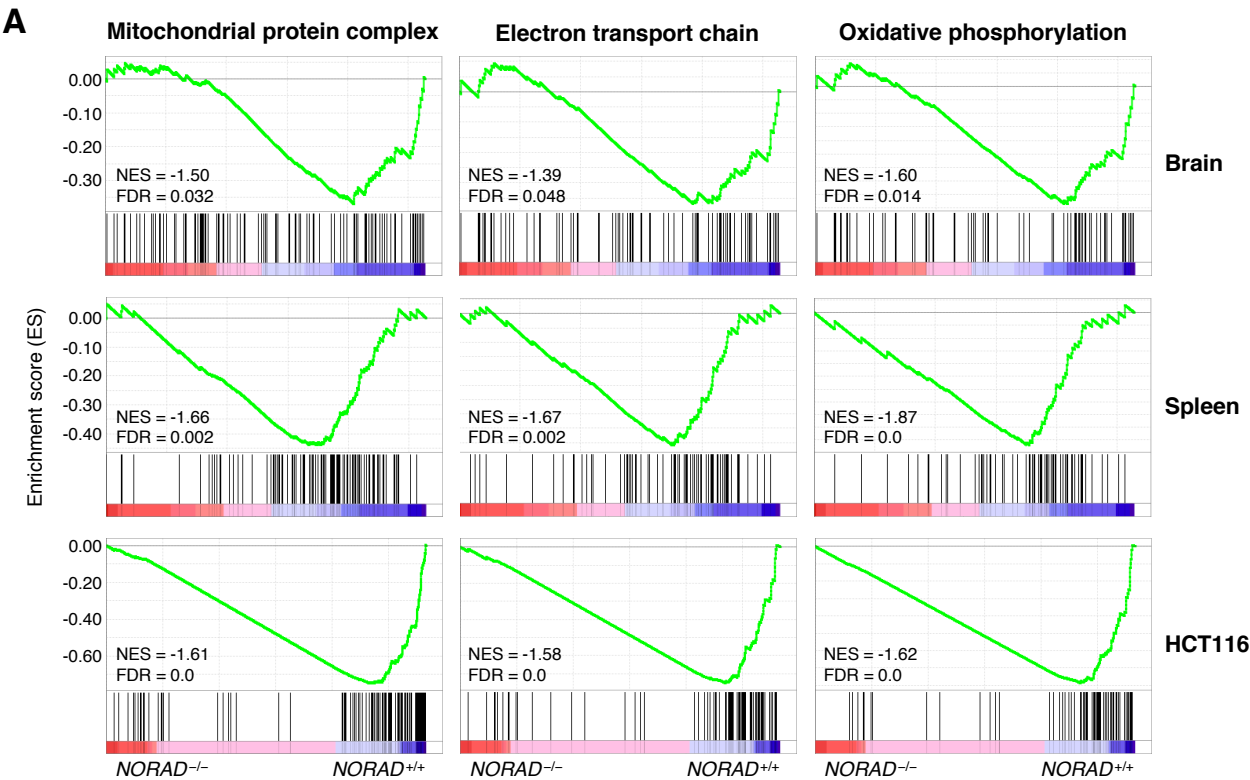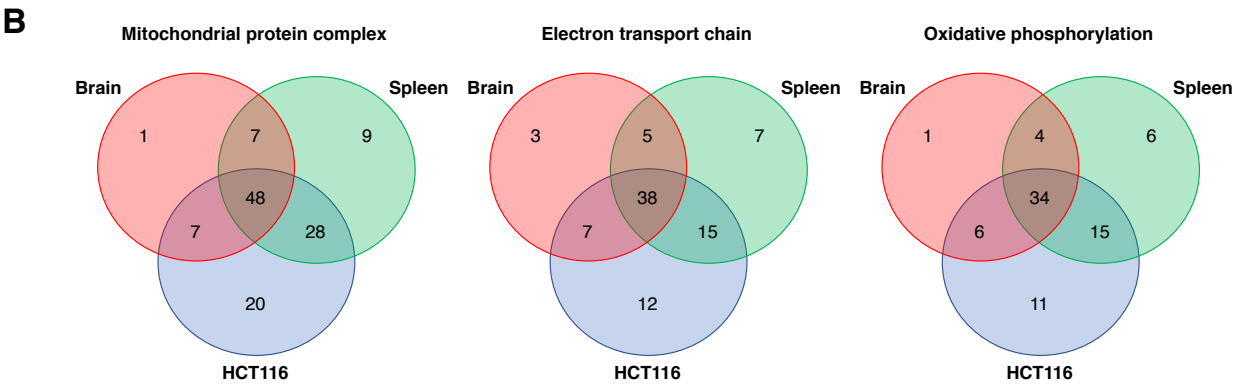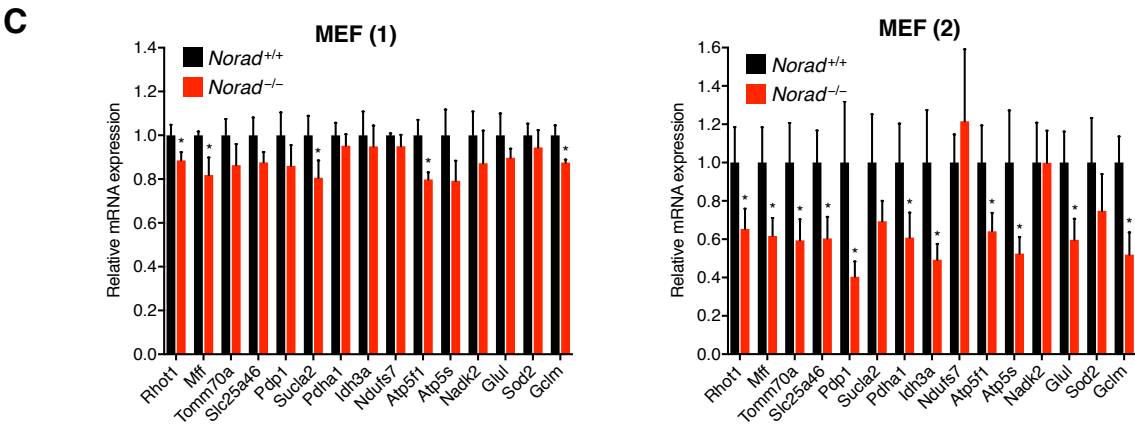

Supplement: supp [file elife-42650-supp-v1.zip]

Figure 1 – figure supplement 2

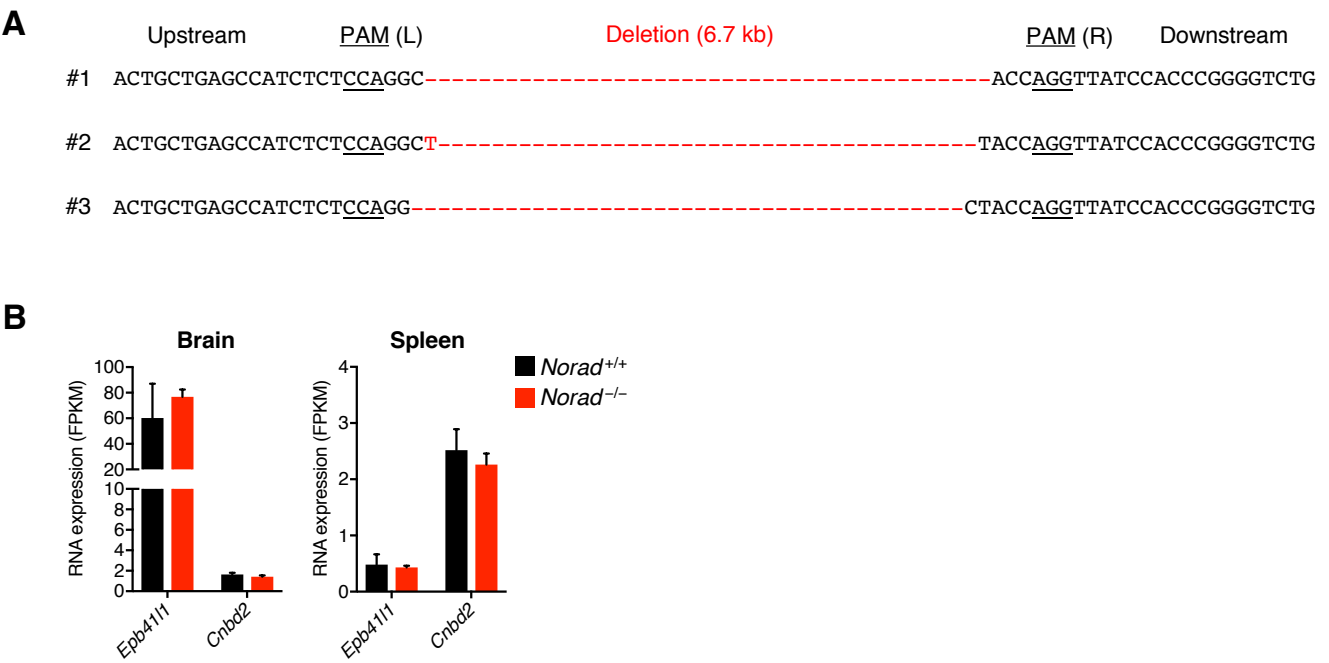

Supplement: supp [file elife-42650-supp-v1.zip]

Figure 5 – figure supplement 1

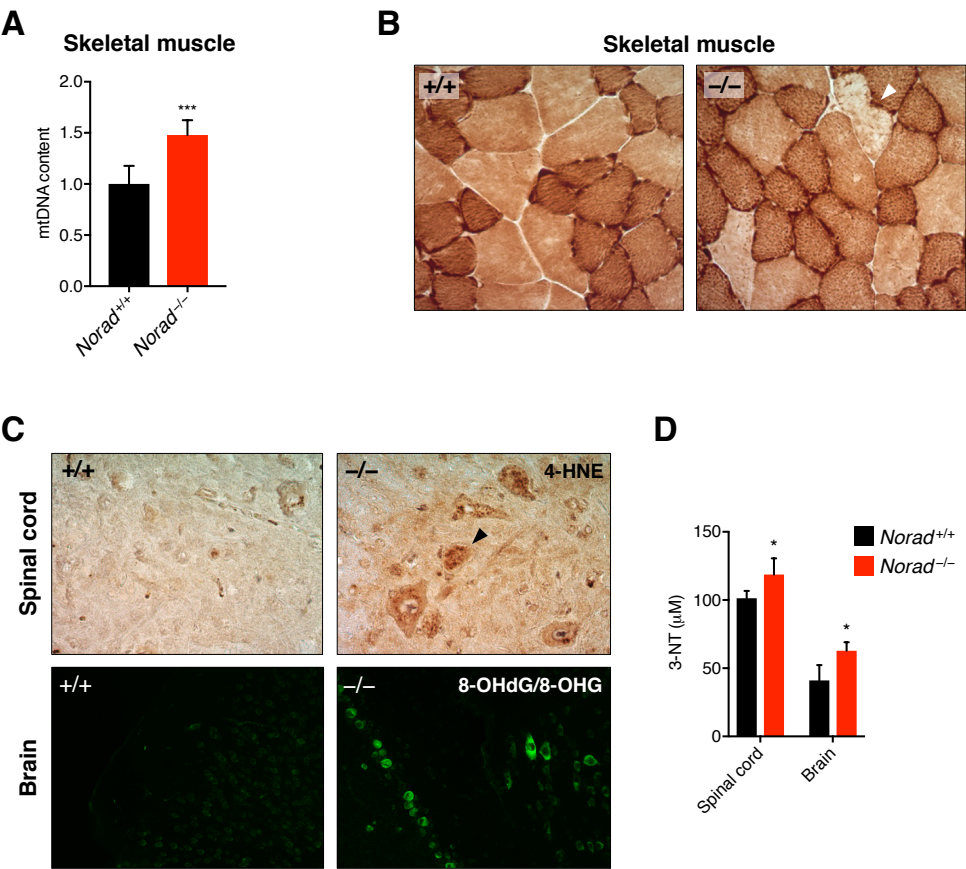

Supplement: supp [file elife-42650-supp-v1.zip]

Figure 4 – figure supplement 1

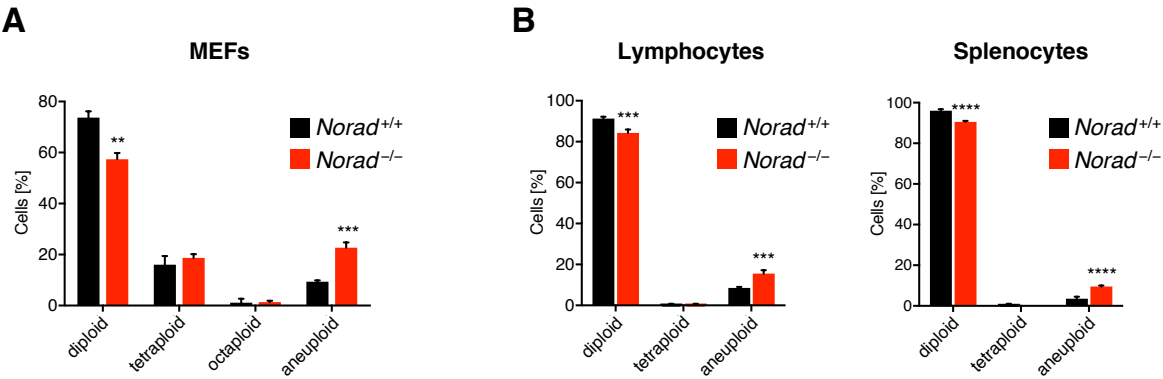

Supplement: supp [file elife-42650-supp-v1.zip]

Figure 5 – figure supplement 2

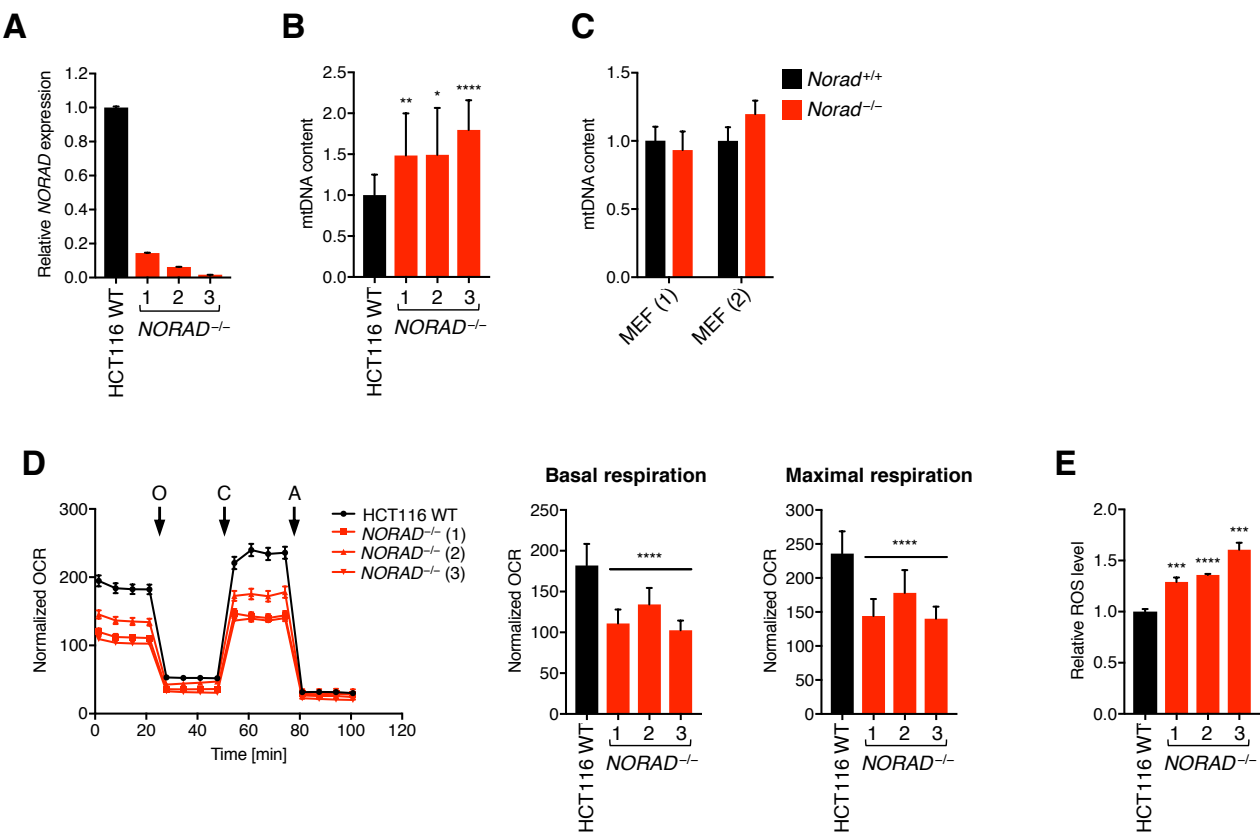

Supplement: supp [file elife-42650-supp-v1.zip]

Figure 2 – figure supplement 1

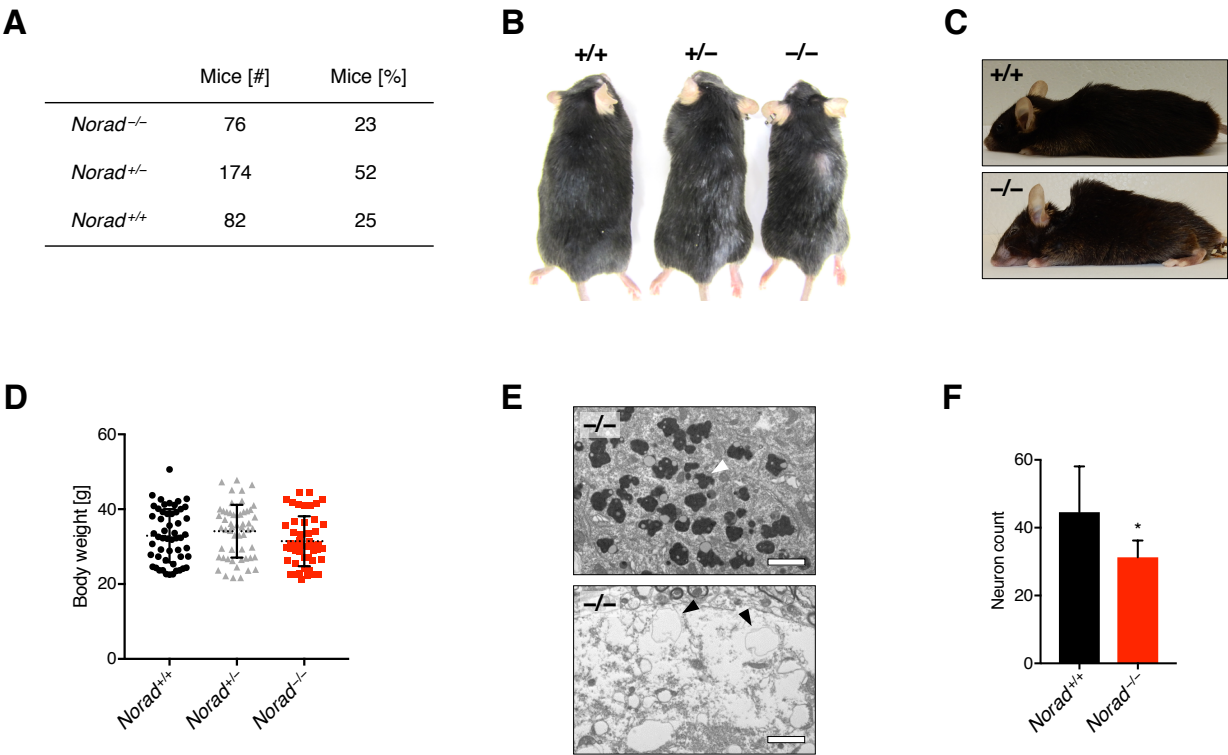

Supplement: supp [file elife-42650-supp-v1.zip]
